# Supplementary material for: Unravelling intrinsic descriptors based on a two-stage activity regulation of bimetallic 2D c-MOFs for CO2RR
Source: Royal Society of Chemistry journal article supplement (doi:10.1039/d2nr07301c), 2023-01-01
Supplement: d2nr07301c1.pdf [file d2nr07301c1.pdf]

*Supporting Information*

**Unravelling intrinsic descriptor based on two-stage activity  
regulation of bimetallic 2D c-MOFs for CO<sub>2</sub>RR**

**Table of Contents**

|                                                                            |           |
|----------------------------------------------------------------------------|-----------|
| <b>Free energy of HER on M<sub>1</sub>Pc-M<sub>2</sub>-O surfaces.....</b> | <b>S2</b> |
| <b>CO<sub>2</sub>RR and HER selectivity on 2D c-MOFs.....</b>              | <b>S2</b> |
| <b>Free energy diagrams at reaction sites on NiPc-M-O.....</b>             | <b>S3</b> |
| <b>Intrinsic descriptor <math>\phi</math> size of six catalysts.....</b>   | <b>S4</b> |
| <b>Electronic Energies of related compounds.....</b>                       | <b>S4</b> |
| <b>Gibbs Free Energies of related compounds.....</b>                       | <b>S7</b> |
| <b>Cartesian Coordinates of related compounds.....</b>                     | <b>S9</b> |

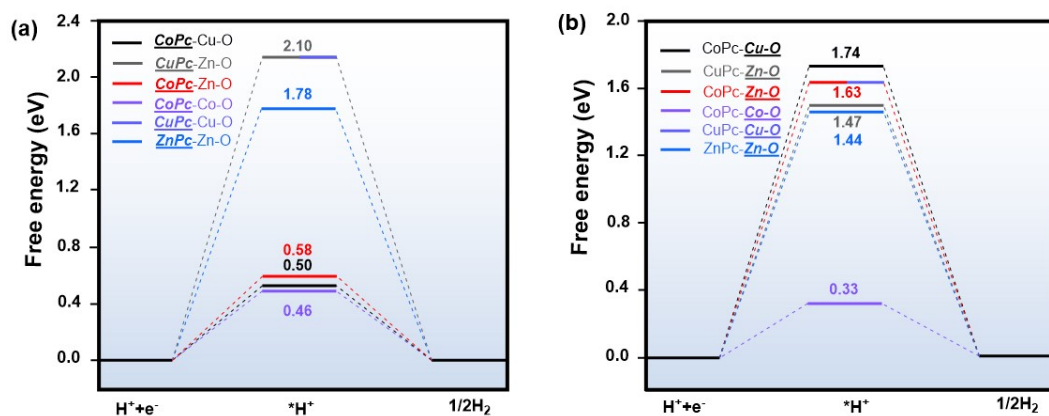

Figure S1. DFT calculation of HER. Free energy profiles of HER on (a) M<sub>1</sub>Pc and (b) M<sub>2</sub>-O of M<sub>1</sub>Pc-M<sub>2</sub>-O at  $U=0.0$  V, respectively.

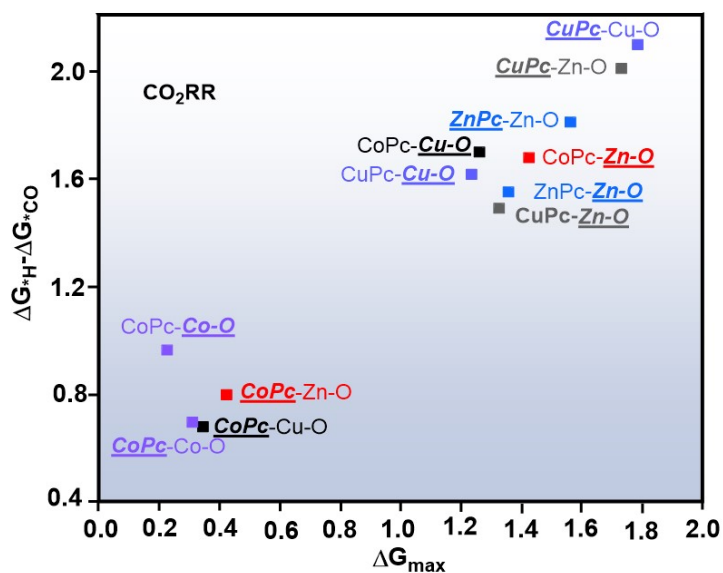

Figure S2. CO<sub>2</sub>RR and HER selectivity on 2D c-MOFs

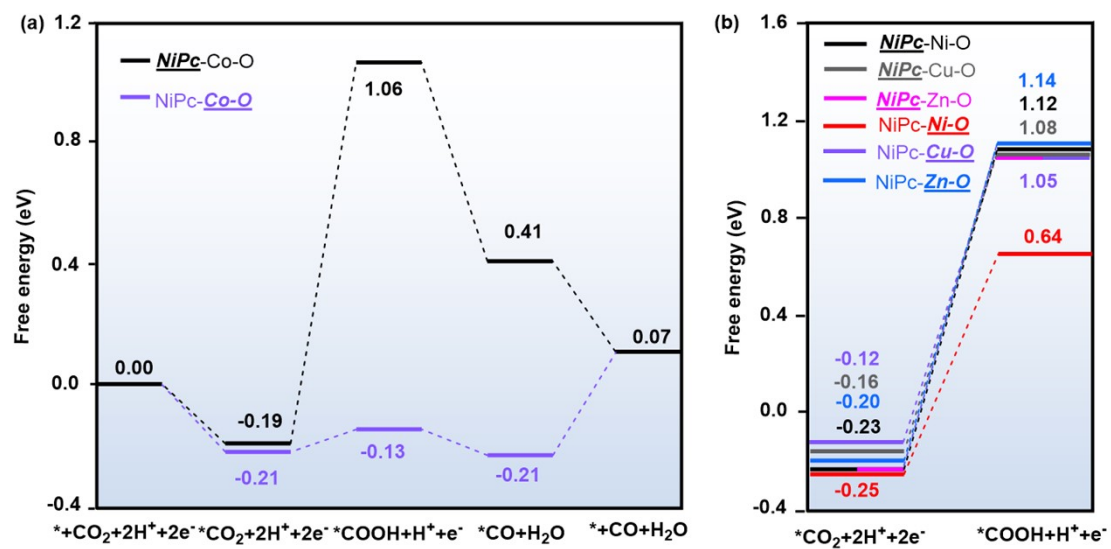

Figure S3. (a) Free energy diagrams of electrocatalytic CO<sub>2</sub> reduction at NiPc sites and Co-O sites in NiPc-Co-O at U=0.0 V, respectively. (b) Potential-determining steps and energy barriers at the reaction site of NiPc-Ni-O, NiPc-Cu-O and NiPc-Zn-O.

### Intrinsic descriptor $\phi$ size of six catalysts

Table S1 Potential-determining energy barriers of  $M_1\text{Pc}$  and  $M_2\text{-O}$  sites, M-N/M-O bond length and intrinsic descriptor  $\phi$  size for CoPc-Co-O, CoPc-Cu-O, CoPc-Zn-O, CuPc-Zn-O, ZnPc-Zn-O and CuPc-Cu-O.

| $M_1\text{Pc-M}_2\text{-O}$ | $\Delta G_{\max}$<br>[ $M_1\text{Pc}$ ] | $\Delta G_{\max}$<br>[ $M_2\text{-O}$ ] | $L_{\text{M-N}}$ | $L_{\text{M-O}}$ | $\phi = (4V_1 \times E_1 + V_2 \times E_2) \times L_{\text{M1-N}}$ | $\phi = (V_1 \times E_1 + 4V_2 \times E_2) \times L_{\text{M2-O}}$ |
|-----------------------------|-----------------------------------------|-----------------------------------------|------------------|------------------|--------------------------------------------------------------------|--------------------------------------------------------------------|
| CoPc-Co-O                   | 0.31                                    | 0.22                                    | 1.891            | 1.825            | 136.496                                                            | 128.188                                                            |
| CoPc-Cu-O                   | 0.33                                    | 1.26                                    | 1.889            | 1.931            | 142.315                                                            | 160.018                                                            |
| CoPc-Zn-O                   | 0.42                                    | 1.43                                    | 1.889            | 2.013            | 143.402                                                            | 171.448                                                            |
| CuPc-Zn-O                   | 1.72                                    | 1.32                                    | 1.957            | 2.019            | 174.469                                                            | 178.640                                                            |
| ZnPc-Zn-O                   | 1.56                                    | 1.35                                    | 1.997            | 2.017            | 182.187                                                            | 179.512                                                            |
| CuPc-Cu-O                   | 1.78                                    | 1.23                                    | 1.957            | 1.930            | 173.342                                                            | 166.322                                                            |

### Electronic Energies of related compounds

Table S2 Electronic Energies of all compounds in the manuscript

|                                | Electronic Energy (eV) |
|--------------------------------|------------------------|
| CoPc-Co-O                      | -460.13066             |
| $\text{CO}_2@\text{CoPc-Co-O}$ | -483.34332             |
| $\text{COOH}@\text{CoPc-Co-O}$ | -486.75066             |
| $\text{CO}@\text{CoPc-Co-O}$   | -475.37541             |
| $\text{CO}_2@\text{CoPc-Co-O}$ | -483.23322             |
| $\text{COOH}@\text{CoPc-Co-O}$ | -486.99486             |
| $\text{CO}@\text{CoPc-Co-O}$   | -475.78042             |
| CoPc-Cu-O                      | -452.04601             |
| $\text{CO}_2@\text{CoPc-Cu-O}$ | -475.20735             |
| $\text{COOH}@\text{CoPc-Cu-O}$ | -478.60264             |
| $\text{CO}@\text{CoPc-Cu-O}$   | -467.22753             |
| $\text{CO}_2@\text{CoPc-Cu-O}$ | -475.16053             |
| $\text{COOH}@\text{CoPc-Cu-O}$ | -477.64672             |
| $\text{CO}@\text{CoPc-Cu-O}$   | -466.95324             |
| CoPc-Zn-O                      | -449.70901             |
| $\text{CO}_2@\text{CoPc-Zn-O}$ | -472.92074             |
| $\text{COOH}@\text{CoPc-Zn-O}$ | -476.22748             |
| $\text{CO}@\text{CoPc-Zn-O}$   | -464.93703             |

|                                         |            |
|-----------------------------------------|------------|
| $\text{CO}_2@\text{CoPc-}\mathbf{Zn-O}$ | -472.88865 |
| $\text{COOH}@\text{CoPc-}\mathbf{Zn-O}$ | -475.18497 |
| $\text{CO}@\text{CoPc-}\mathbf{Zn-O}$   | -464.70451 |
| $\text{CuPc-Zn-O}$                      | -445.08695 |
| $\text{CO}_2@ \mathbf{CuPc}$ -Zn-O      | -468.27288 |
| $\text{COOH}@ \mathbf{CuPc}$ -Zn-O      | -470.20103 |
| $\text{CO}@ \mathbf{CuPc}$ -Zn-O        | -459.91192 |
| $\text{CO}_2@\text{CuPc-}\mathbf{Zn-O}$ | -468.24927 |
| $\text{COOH}@\text{CuPc-}\mathbf{Zn-O}$ | -470.58974 |
| $\text{CO}@\text{CuPc-}\mathbf{Zn-O}$   | -460.05513 |
| $\text{ZnPc-Zn-O}$                      | -443.33098 |
| $\text{CO}_2@ \mathbf{ZnPc}$ -Zn-O      | -466.5302  |
| $\text{COOH}@ \mathbf{ZnPc}$ -Zn-O      | -468.61925 |
| $\text{CO}@ \mathbf{ZnPc}$ -Zn-O        | -458.31115 |
| $\text{CO}_2@\text{ZnPc-}\mathbf{Zn-O}$ | -466.50873 |
| $\text{COOH}@\text{ZnPc-}\mathbf{Zn-O}$ | -468.91736 |
| $\text{CO}@\text{ZnPc-}\mathbf{Zn-O}$   | -458.38499 |
| $\text{CuPc-Cu-O}$                      | -447.40165 |
| $\text{CO}_2@ \mathbf{CuPc}$ -Cu-O      | -470.61417 |
| $\text{COOH}@ \mathbf{CuPc}$ -Cu-O      | -472.50474 |
| $\text{CO}@ \mathbf{CuPc}$ -Cu-O        | -462.31675 |
| $\text{CO}_2@\text{CuPc-}\mathbf{Cu-O}$ | -470.56982 |
| $\text{COOH}@\text{CuPc-}\mathbf{Cu-O}$ | -473.07429 |
| $\text{CO}@\text{CuPc-}\mathbf{Cu-O}$   | -462.32981 |
| $\text{NiPc-Co-O}$                      | -458.48715 |
| $\text{CO}_2@ \mathbf{NiPc}$ -Co-O      | -481.69795 |
| $\text{COOH}@ \mathbf{NiPc}$ -Co-O      | -484.13295 |
| $\text{CO}@ \mathbf{NiPc}$ -Co-O        | -473.41374 |
| $\text{CO}_2@\text{NiPc-}\mathbf{Co-O}$ | -481.68181 |

|                                            |            |
|--------------------------------------------|------------|
| COOH@NiPc- <b><i>Co-O</i></b>              | -485.37021 |
| CO@NiPc- <b><i>Co-O</i></b>                | -474.18906 |
| NiPc-Ni-O                                  | -455.42861 |
| CO <sub>2</sub> @ <b><i>NiPc</i></b> -Ni-O | -478.63408 |
| COOH@ <b><i>NiPc</i></b> -Ni-O             | -481.01391 |
| CO <sub>2</sub> @NiPc- <b><i>Ni-O</i></b>  | -478.61884 |
| COOH@NiPc- <b><i>Ni-O</i></b>              | -481.51946 |
| NiPc-Cu-O                                  | -450.29727 |
| CO <sub>2</sub> @ <b><i>NiPc</i></b> -Cu-O | -473.51632 |
| COOH@ <b><i>NiPc</i></b> -Cu-O             | -475.92392 |
| CO <sub>2</sub> @NiPc- <b><i>Cu-O</i></b>  | -473.43676 |
| COOH@NiPc- <b><i>Cu-O</i></b>              | -475.96776 |
| NiPc-Zn-O                                  | -447.87669 |
| CO <sub>2</sub> @ <b><i>NiPc</i></b> -Zn-O | -471.08108 |
| COOH@ <b><i>NiPc</i></b> -Zn-O             | -473.56997 |
| CO <sub>2</sub> @NiPc- <b><i>Zn-O</i></b>  | -471.06281 |
| COOH@NiPc- <b><i>Zn-O</i></b>              | -473.42496 |

### Gibbs Free Energies of related compounds

Table S3 Gibbs Free Energies of related compounds in the manuscript

|                                     | Gibbs Free Energy (eV) |
|-------------------------------------|------------------------|
| CO <sub>2</sub> @ <b>CoPc</b> -Co-O | -483.14659             |
| COOH@ <b>CoPc</b> -Co-O             | -486.242922            |
| CO@ <b>CoPc</b> -Co-O               | -475.218296            |
| CO <sub>2</sub> @CoPc- <b>Co-O</b>  | -483.071195            |
| COOH@CoPc- <b>Co-O</b>              | -486.476264            |
| CO@CoPc- <b>Co-O</b>                | -475.639062            |
| CO <sub>2</sub> @ <b>CoPc</b> -Cu-O | -475.015472            |
| COOH@ <b>CoPc</b> -Cu-O             | -478.087223            |
| CO@ <b>CoPc</b> -Cu-O               | -467.098407            |
| CO <sub>2</sub> @CoPc- <b>Cu-O</b>  | -475.029792            |
| COOH@CoPc- <b>Cu-O</b>              | -477.18083             |
| CO@CoPc- <b>Cu-O</b>                | -466.93421             |
| CO <sub>2</sub> @ <b>CoPc</b> -Zn-O | -472.725087            |
| COOH@ <b>CoPc</b> -Zn-O             | -475.711547            |
| CO@ <b>CoPc</b> -Zn-O               | -464.818242            |
| CO <sub>2</sub> @CoPc- <b>Zn-O</b>  | -472.713897            |
| COOH@CoPc- <b>Zn-O</b>              | -474.69687             |
| CO@CoPc- <b>Zn-O</b>                | -464.617584            |
| CO <sub>2</sub> @ <b>CuPc</b> -Zn-O | -468.04612             |
| COOH@ <b>CuPc</b> -Zn-O             | -469.728567            |
| CO@ <b>CuPc</b> -Zn-O               | -459.880882            |
| CO <sub>2</sub> @CuPc- <b>Zn-O</b>  | -468.059044            |
| COOH@CuPc- <b>Zn-O</b>              | -470.146136            |
| CO@CuPc- <b>Zn-O</b>                | -459.99807             |
| CO <sub>2</sub> @ <b>ZnPc</b> -Zn-O | -466.333857            |
| COOH@ <b>ZnPc</b> -Zn-O             | -468.183134            |

|                                     |             |
|-------------------------------------|-------------|
| CO@ <b>ZnPc</b> -Zn-O               | -458.258958 |
| CO <sub>2</sub> @ZnPc- <b>Zn-O</b>  | -466.345976 |
| COOH@ZnPc- <b>Zn-O</b>              | -468.405976 |
| CO@ZnPc- <b>Zn-O</b>                | -458.325421 |
| CO <sub>2</sub> @ <b>CuPc</b> -Cu-O | -470.42384  |
| COOH@ <b>CuPc</b> -Cu-O             | -472.053019 |
| CO@ <b>CuPc</b> -Cu-O               | -462.316041 |
| CO <sub>2</sub> @CuPc- <b>Cu-O</b>  | -470.439082 |
| COOH@CuPc- <b>Cu-O</b>              | -472.612539 |
| CO@CuPc- <b>Cu-O</b>                | -462.318208 |
| CO <sub>2</sub> @ <b>NiPc</b> -Co-O | -481.505431 |
| COOH@ <b>NiPc</b> -Co-O             | -483.662691 |
| CO@ <b>NiPc</b> -Co-O               | -473.439546 |
| CO <sub>2</sub> @NiPc- <b>Co-O</b>  | -481.521943 |
| COOH@NiPc- <b>Co-O</b>              | -484.85257  |
| CO@NiPc- <b>Co-O</b>                | -474.06142  |
| CO <sub>2</sub> @ <b>NiPc</b> -Ni-O | -478.479318 |
| COOH@ <b>NiPc</b> -Ni-O             | -480.545434 |
| CO <sub>2</sub> @NiPc- <b>Ni-O</b>  | -478.500253 |
| COOH@NiPc- <b>Ni-O</b>              | -481.018185 |
| CO <sub>2</sub> @ <b>NiPc</b> -Cu-O | -473.285752 |
| COOH@ <b>NiPc</b> -Cu-O             | -475.450614 |
| CO <sub>2</sub> @NiPc- <b>Cu-O</b>  | -473.240697 |
| COOH@NiPc- <b>Cu-O</b>              | -475.485326 |
| CO <sub>2</sub> @ <b>NiPc</b> -Zn-O | -470.928346 |
| COOH@ <b>NiPc</b> -Zn-O             | -473.06319  |
| CO <sub>2</sub> @NiPc- <b>Zn-O</b>  | -470.900739 |
| COOH@NiPc- <b>Zn-O</b>              | -472.965157 |

# **Cartesian Coordinates of related compounds (Angstroms)**

CoPo-Co-O

|    | ATOM | X        | Y        | Z       |
|----|------|----------|----------|---------|
| 1  | C    | 5.54284  | 6.96590  | 2.40831 |
| 1  | C    | 5.52212  | 6.93639  | 0.53945 |
| 2  | C    | 5.92365  | 5.54806  | 0.53909 |
| 3  | C    | 7.33743  | 5.54645  | 0.53339 |
| 4  | C    | 7.74167  | 6.93428  | 0.53538 |
| 5  | C    | 9.36434  | 8.55490  | 0.53587 |
| 6  | C    | 10.75267 | 8.95768  | 0.53444 |
| 7  | C    | 10.75249 | 10.37148 | 0.53757 |
| 8  | C    | 9.36462  | 10.77452 | 0.53728 |
| 9  | C    | 7.74403  | 12.39739 | 0.52837 |
| 10 | C    | 7.34243  | 13.78578 | 0.52004 |
| 11 | C    | 5.92863  | 13.78725 | 0.52509 |
| 12 | C    | 5.52453  | 12.39936 | 0.53169 |
| 13 | C    | 3.90204  | 10.77852 | 0.53210 |
| 14 | C    | 2.51371  | 10.37607 | 0.52633 |
| 15 | C    | 2.51354  | 8.96229  | 0.52345 |
| 16 | C    | 3.90140  | 8.55897  | 0.53120 |
| 17 | C    | 5.17650  | 14.95942 | 0.52295 |
| 18 | C    | 5.91817  | 16.14929 | 0.51519 |
| 19 | C    | 7.35882  | 16.14748 | 0.50729 |
| 20 | C    | 8.09748  | 14.95588 | 0.50939 |
| 21 | C    | 1.34269  | 8.20847  | 0.51494 |
| 22 | C    | 0.15201  | 8.94856  | 0.51233 |
| 23 | C    | 0.15181  | 10.38925 | 0.51755 |
| 24 | C    | 1.34246  | 11.12963 | 0.52346 |
| 25 | C    | 8.08933  | 4.37420  | 0.52408 |
| 26 | C    | 7.34729  | 3.18456  | 0.52127 |
| 27 | C    | 5.90661  | 3.18657  | 0.52971 |
| 28 | C    | 5.16824  | 4.37823  | 0.53902 |
| 29 | C    | 11.92300 | 11.12587 | 0.53617 |
| 30 | C    | 13.11397 | 10.38641 | 0.52882 |
| 31 | C    | 13.11462 | 8.94571  | 0.52356 |
| 32 | C    | 11.92428 | 8.20467  | 0.52730 |
| 33 | N    | 6.63252  | 7.77551  | 0.53848 |
| 34 | N    | 4.25048  | 7.28694  | 0.53571 |
| 35 | N    | 9.01386  | 7.28315  | 0.53397 |
| 36 | N    | 8.52439  | 9.66502  | 0.53780 |
| 37 | N    | 9.01556  | 12.04657 | 0.53202 |
| 38 | N    | 6.63366  | 11.55829 | 0.53346 |
| 39 | N    | 4.25242  | 12.05027 | 0.53266 |

|    |    |          |          |         |
|----|----|----------|----------|---------|
| 40 | N  | 4.74187  | 9.66836  | 0.53443 |
| 41 | Co | 6.63312  | 9.66681  | 0.53722 |
| 42 | Co | 15.64259 | 9.66801  | 0.51355 |
| 43 | Co | 6.62286  | 0.65732  | 0.51061 |
| 44 | O  | 14.32969 | 8.39927  | 0.51470 |
| 45 | O  | 14.32821 | 10.93472 | 0.52499 |
| 46 | O  | 16.95599 | 10.93634 | 0.51739 |
| 47 | O  | 16.95658 | 8.40086  | 0.50698 |
| 48 | O  | 5.35724  | 1.97283  | 0.52645 |
| 49 | O  | 7.89276  | 1.96905  | 0.51039 |
| 50 | O  | 5.37245  | 17.36474 | 0.51574 |
| 51 | O  | 7.90789  | 17.36134 | 0.50035 |
| 52 | H  | 11.92485 | 12.21564 | 0.53943 |
| 53 | H  | 11.92775 | 7.11484  | 0.52310 |
| 54 | H  | 1.33934  | 12.21942 | 0.52672 |
| 55 | H  | 1.34029  | 7.11868  | 0.51103 |
| 56 | H  | 9.18725  | 14.95724 | 0.50362 |
| 57 | H  | 4.08672  | 14.96378 | 0.52829 |
| 58 | H  | 9.17910  | 4.36965  | 0.51738 |
| 59 | H  | 4.07848  | 4.37729  | 0.54466 |

CO<sub>2</sub>@CoPc-Co-O

|    | ATOM | X        | Y        | Z       |
|----|------|----------|----------|---------|
| 1  | C    | 5.54284  | 6.96590  | 2.40831 |
| 2  | C    | 5.94450  | 5.57713  | 2.42536 |
| 3  | C    | 7.35831  | 5.57566  | 2.42901 |
| 4  | C    | 7.76258  | 6.96416  | 2.41414 |
| 5  | C    | 9.38615  | 8.58528  | 2.41670 |
| 6  | C    | 10.77487 | 8.98805  | 2.43282 |
| 7  | C    | 10.77514 | 10.40189 | 2.42662 |
| 8  | C    | 9.38701  | 10.80550 | 2.40707 |
| 9  | C    | 7.76557  | 12.42846 | 2.40003 |
| 10 | C    | 7.36368  | 13.81737 | 2.41581 |
| 11 | C    | 5.94985  | 13.81862 | 2.41867 |
| 12 | C    | 5.54571  | 12.43021 | 2.40432 |
| 13 | C    | 3.92235  | 10.80890 | 2.41066 |
| 14 | C    | 2.53355  | 10.40602 | 2.42783 |
| 15 | C    | 2.53352  | 8.99218  | 2.42745 |
| 16 | C    | 3.92172  | 8.58882  | 2.41006 |
| 17 | C    | 5.19811  | 14.99107 | 2.43945 |
| 18 | C    | 5.93933  | 16.18156 | 2.45487 |
| 19 | C    | 7.37973  | 16.18002 | 2.45290 |
| 20 | C    | 8.11815  | 14.98795 | 2.43418 |
| 21 | C    | 1.36254  | 8.23845  | 2.44623 |
| 22 | C    | 0.17097  | 8.97760  | 2.46261 |

|    |    |          |          |         |
|----|----|----------|----------|---------|
| 23 | C  | 0.17053  | 10.41805 | 2.46212 |
| 24 | C  | 1.36155  | 11.15855 | 2.44637 |
| 25 | C  | 8.10975  | 4.40300  | 2.44831 |
| 26 | C  | 7.36808  | 3.21271  | 2.46132 |
| 27 | C  | 5.92764  | 3.21458  | 2.45872 |
| 28 | C  | 5.18961  | 4.40683  | 2.44185 |
| 29 | C  | 11.94653 | 11.15516 | 2.44251 |
| 30 | C  | 13.13787 | 10.41566 | 2.46182 |
| 31 | C  | 13.13799 | 8.97521  | 2.46681 |
| 32 | C  | 11.94669 | 8.23517  | 2.45415 |
| 33 | C  | 6.86543  | 9.68816  | 5.67730 |
| 34 | N  | 6.65312  | 7.80531  | 2.39820 |
| 35 | N  | 4.27114  | 7.31680  | 2.41111 |
| 36 | N  | 9.03479  | 7.31368  | 2.42169 |
| 37 | N  | 8.54621  | 9.69585  | 2.40027 |
| 38 | N  | 9.03727  | 12.07746 | 2.40429 |
| 39 | N  | 6.65522  | 11.58919 | 2.39052 |
| 40 | N  | 4.27352  | 12.08058 | 2.41133 |
| 41 | N  | 4.76239  | 9.69837  | 2.39948 |
| 42 | Co | 6.65413  | 9.69711  | 2.38773 |
| 43 | Co | 15.66909 | 9.69639  | 2.48404 |
| 44 | Co | 6.64388  | 0.68237  | 2.47807 |
| 45 | O  | 14.35327 | 8.42909  | 2.48259 |
| 46 | O  | 14.35280 | 10.96252 | 2.47543 |
| 47 | O  | 16.98499 | 10.96387 | 2.47647 |
| 48 | O  | 16.98604 | 8.43048  | 2.47846 |
| 49 | O  | 5.37935  | 2.00043  | 2.47203 |
| 50 | O  | 7.91274  | 1.99697  | 2.47525 |
| 51 | O  | 5.39439  | 17.39729 | 2.47145 |
| 52 | O  | 7.92778  | 17.39428 | 2.46938 |
| 53 | O  | 7.39094  | 8.63634  | 5.65243 |
| 54 | O  | 6.34041  | 10.74027 | 5.70382 |
| 55 | H  | 11.94995 | 12.24483 | 2.44059 |
| 56 | H  | 11.95053 | 7.14555  | 2.46098 |
| 57 | H  | 1.35729  | 12.24816 | 2.44921 |
| 58 | H  | 1.35975  | 7.14877  | 2.44884 |
| 59 | H  | 9.20783  | 14.99018 | 2.43529 |
| 60 | H  | 4.10848  | 14.99597 | 2.44482 |
| 61 | H  | 9.19940  | 4.39781  | 2.45324 |
| 62 | H  | 4.09994  | 4.40506  | 2.44204 |

COOH@*CoPc*-Co-O

|   | ATOM | X       | Y       | Z       |
|---|------|---------|---------|---------|
| 1 | C    | 5.53315 | 9.45581 | 6.27646 |

|    |    |          |          |         |
|----|----|----------|----------|---------|
| 2  | C  | 5.93389  | 8.06558  | 6.27003 |
| 3  | C  | 7.35165  | 8.06273  | 6.26633 |
| 4  | C  | 7.75830  | 9.45073  | 6.26995 |
| 5  | C  | 9.38452  | 11.07243 | 6.25277 |
| 6  | C  | 10.77329 | 11.47761 | 6.24811 |
| 7  | C  | 10.77108 | 12.89562 | 6.24900 |
| 8  | C  | 9.37999  | 13.29651 | 6.25255 |
| 9  | C  | 7.75376  | 14.92457 | 6.24719 |
| 10 | C  | 7.35429  | 16.31603 | 6.23976 |
| 11 | C  | 5.93629  | 16.31979 | 6.23556 |
| 12 | C  | 5.52950  | 14.93158 | 6.24019 |
| 13 | C  | 3.90584  | 13.30719 | 6.25346 |
| 14 | C  | 2.51728  | 12.90206 | 6.24899 |
| 15 | C  | 2.51872  | 11.48429 | 6.25565 |
| 16 | C  | 3.90855  | 11.08216 | 6.26684 |
| 17 | C  | 5.18377  | 17.48910 | 6.23286 |
| 18 | C  | 5.90864  | 0.64826  | 6.23616 |
| 19 | C  | 7.35311  | 0.64516  | 6.23762 |
| 20 | C  | 8.11120  | 17.48262 | 6.23810 |
| 21 | C  | 1.35112  | 10.72866 | 6.25149 |
| 22 | C  | 0.16023  | 11.46942 | 6.24711 |
| 23 | C  | 0.15918  | 12.91398 | 6.24337 |
| 24 | C  | 1.34880  | 13.65619 | 6.24131 |
| 25 | C  | 8.10472  | 6.89356  | 6.25747 |
| 26 | C  | 7.36139  | 5.70464  | 6.25515 |
| 27 | C  | 5.91685  | 5.70713  | 6.25741 |
| 28 | C  | 5.17724  | 6.89869  | 6.26333 |
| 29 | C  | 11.93847 | 13.65128 | 6.24620 |
| 30 | C  | 13.12971 | 12.91071 | 6.24594 |
| 31 | C  | 13.13128 | 11.46624 | 6.24625 |
| 32 | C  | 11.94178 | 10.72370 | 6.24594 |
| 33 | C  | 6.67279  | 12.23335 | 8.28243 |
| 34 | N  | 6.64756  | 10.28267 | 6.26842 |
| 35 | N  | 4.26434  | 9.81301  | 6.27878 |
| 36 | N  | 9.02915  | 9.80261  | 6.26937 |
| 37 | N  | 8.55437  | 12.18270 | 6.24146 |
| 38 | N  | 9.02232  | 14.56560 | 6.26164 |
| 39 | N  | 6.63892  | 14.10020 | 6.23420 |
| 40 | N  | 4.25923  | 14.57758 | 6.25265 |
| 41 | N  | 4.73652  | 12.19571 | 6.25607 |
| 42 | Co | 6.64357  | 12.19032 | 6.36149 |
| 43 | Co | 15.66000 | 12.19051 | 6.24506 |
| 44 | Co | 6.63527  | 3.17644  | 6.24464 |
| 45 | O  | 14.34634 | 10.92813 | 6.24725 |

|    |   |          |          |         |
|----|---|----------|----------|---------|
| 46 | O | 14.34384 | 13.45089 | 6.24601 |
| 47 | O | 16.97402 | 13.45253 | 6.24293 |
| 48 | O | 16.97561 | 10.92972 | 6.24791 |
| 49 | O | 5.37594  | 4.49333  | 6.25340 |
| 50 | O | 7.89866  | 4.48918  | 6.25029 |
| 51 | O | 5.37170  | 1.86381  | 6.23955 |
| 52 | O | 7.89441  | 1.85878  | 6.24057 |
| 53 | O | 7.42365  | 12.96706 | 8.89032 |
| 54 | O | 5.78987  | 11.38151 | 8.80231 |
| 55 | H | 11.94068 | 14.74102 | 6.24625 |
| 56 | H | 11.94504 | 9.63397  | 6.24592 |
| 57 | H | 1.34545  | 14.74587 | 6.23748 |
| 58 | H | 1.34942  | 9.63894  | 6.25432 |
| 59 | H | 9.20094  | 17.48333 | 6.24029 |
| 60 | H | 4.09409  | 17.49357 | 6.23171 |
| 61 | H | 9.19439  | 6.88943  | 6.25402 |
| 62 | H | 4.08754  | 6.89786  | 6.26387 |
| 63 | H | 5.82404  | 11.42649 | 9.78924 |

CO@*CoPc*-Co-O

|    | ATOM | X        | Y        | Z       |
|----|------|----------|----------|---------|
| 1  | C    | 5.52839  | 6.92464  | 3.15800 |
| 2  | C    | 5.93096  | 5.53534  | 3.11767 |
| 3  | C    | 7.34995  | 5.53389  | 3.11227 |
| 4  | C    | 7.75538  | 6.92270  | 3.14964 |
| 5  | C    | 9.38590  | 8.55124  | 3.14889 |
| 6  | C    | 10.77528 | 8.95555  | 3.11111 |
| 7  | C    | 10.77486 | 10.37452 | 3.11533 |
| 8  | C    | 9.38584  | 10.77819 | 3.15553 |
| 9  | C    | 7.75721  | 12.40835 | 3.16408 |
| 10 | C    | 7.35450  | 13.79798 | 3.12994 |
| 11 | C    | 5.93558  | 13.79945 | 3.13535 |
| 12 | C    | 5.53068  | 12.41016 | 3.17226 |
| 13 | C    | 3.90061  | 10.78148 | 3.17341 |
| 14 | C    | 2.51090  | 10.37829 | 3.13708 |
| 15 | C    | 2.51043  | 8.95935  | 3.13296 |
| 16 | C    | 3.89974  | 8.55482  | 3.16704 |
| 17 | C    | 5.18255  | 14.96754 | 3.10753 |
| 18 | C    | 5.92611  | 16.15600 | 3.07879 |
| 19 | C    | 7.37005  | 16.15413 | 3.07329 |
| 20 | C    | 8.11050  | 14.96385 | 3.09638 |
| 21 | C    | 1.34336  | 8.20521  | 3.09956 |
| 22 | C    | 0.15437  | 8.94778  | 3.07489 |
| 23 | C    | 0.15460  | 10.39169 | 3.07898 |

|    |    |          |          |         |
|----|----|----------|----------|---------|
| 24 | C  | 1.34411  | 11.13331 | 3.10795 |
| 25 | C  | 8.10269  | 4.36569  | 3.07996 |
| 26 | C  | 7.35888  | 3.17736  | 3.05980 |
| 27 | C  | 5.91493  | 3.17924  | 3.06519 |
| 28 | C  | 5.17468  | 4.36947  | 3.09098 |
| 29 | C  | 11.94116 | 11.13030 | 3.08813 |
| 30 | C  | 13.13096 | 10.38944 | 3.06303 |
| 31 | C  | 13.13187 | 8.94556  | 3.05893 |
| 32 | C  | 11.94319 | 8.20218  | 3.07959 |
| 33 | C  | 6.66614  | 9.64616  | 5.28921 |
| 34 | N  | 6.64253  | 7.74513  | 3.17608 |
| 35 | N  | 4.25796  | 7.28410  | 3.16777 |
| 36 | N  | 9.02641  | 7.28073  | 3.15118 |
| 37 | N  | 8.56436  | 9.66479  | 3.17470 |
| 38 | N  | 9.02759  | 12.04884 | 3.16442 |
| 39 | N  | 6.64344  | 11.58776 | 3.18761 |
| 40 | N  | 4.25987  | 12.05199 | 3.18055 |
| 41 | N  | 4.72168  | 9.66772  | 3.18940 |
| 42 | Co | 6.64396  | 9.66556  | 3.37775 |
| 43 | Co | 15.65783 | 9.66972  | 3.03827 |
| 44 | Co | 6.63294  | 0.65193  | 3.03930 |
| 45 | O  | 14.34625 | 8.40639  | 3.04008 |
| 46 | O  | 14.34444 | 10.93094 | 3.04709 |
| 47 | O  | 16.97052 | 10.93218 | 3.05661 |
| 48 | O  | 16.97034 | 8.40764  | 3.04955 |
| 49 | O  | 5.37278  | 1.96618  | 3.04960 |
| 50 | O  | 7.89730  | 1.96262  | 3.04020 |
| 51 | O  | 5.38752  | 17.37058 | 3.05823 |
| 52 | O  | 7.91205  | 17.36710 | 3.04860 |
| 53 | O  | 6.71471  | 9.60163  | 6.43680 |
| 54 | H  | 11.94354 | 12.21999 | 3.09205 |
| 55 | H  | 11.94805 | 7.11247  | 3.07720 |
| 56 | H  | 1.34096  | 12.22302 | 3.11064 |
| 57 | H  | 1.33943  | 7.11551  | 3.09607 |
| 58 | H  | 9.20018  | 14.96574 | 3.09200 |
| 59 | H  | 4.09287  | 14.97264 | 3.11137 |
| 60 | H  | 9.19240  | 4.36055  | 3.07653 |
| 61 | H  | 4.08500  | 4.36763  | 3.09568 |

CO<sub>2</sub>@CoPc-**Co-O**

|   | ATOM | X       | Y       | Z       |
|---|------|---------|---------|---------|
| 1 | C    | 5.54552 | 6.96492 | 2.48966 |
| 2 | C    | 5.94656 | 5.57566 | 2.50269 |
| 3 | C    | 7.36146 | 5.57422 | 2.50282 |

|    |    |          |          |         |
|----|----|----------|----------|---------|
| 4  | C  | 7.76508  | 6.96313  | 2.48969 |
| 5  | C  | 9.38802  | 8.58376  | 2.45698 |
| 6  | C  | 10.77813 | 8.98570  | 2.42092 |
| 7  | C  | 10.77818 | 10.40100 | 2.41944 |
| 8  | C  | 9.38852  | 10.80343 | 2.45520 |
| 9  | C  | 7.76732  | 12.42586 | 2.48590 |
| 10 | C  | 7.36616  | 13.81516 | 2.49785 |
| 11 | C  | 5.95123  | 13.81659 | 2.49690 |
| 12 | C  | 5.54768  | 12.42770 | 2.48472 |
| 13 | C  | 3.92493  | 10.80682 | 2.45358 |
| 14 | C  | 2.53486  | 10.40477 | 2.41721 |
| 15 | C  | 2.53484  | 8.98951  | 2.41944 |
| 16 | C  | 3.92442  | 8.58718  | 2.45651 |
| 17 | C  | 5.19937  | 14.98856 | 2.49824 |
| 18 | C  | 5.94119  | 16.17949 | 2.50125 |
| 19 | C  | 7.38248  | 16.17770 | 2.50218 |
| 20 | C  | 8.12111  | 14.98499 | 2.50029 |
| 21 | C  | 1.36594  | 8.23549  | 2.38339 |
| 22 | C  | 0.17374  | 8.97512  | 2.33930 |
| 23 | C  | 0.17336  | 10.41686 | 2.33690 |
| 24 | C  | 1.36514  | 11.15765 | 2.37859 |
| 25 | C  | 8.11318  | 4.40223  | 2.50483 |
| 26 | C  | 7.37118  | 3.21138  | 2.50636 |
| 27 | C  | 5.92987  | 3.21324  | 2.50598 |
| 28 | C  | 5.19138  | 4.40601  | 2.50423 |
| 29 | C  | 11.94733 | 11.15468 | 2.38161 |
| 30 | C  | 13.13946 | 10.41482 | 2.33981 |
| 31 | C  | 13.13972 | 8.97307  | 2.34184 |
| 32 | C  | 11.94781 | 8.23259  | 2.38511 |
| 33 | C  | 15.71612 | 9.71967  | 5.56210 |
| 34 | N  | 6.65580  | 7.80502  | 2.48538 |
| 35 | N  | 4.27384  | 7.31540  | 2.47299 |
| 36 | N  | 9.03731  | 7.31217  | 2.47310 |
| 37 | N  | 8.54722  | 9.69391  | 2.47013 |
| 38 | N  | 9.03906  | 12.07527 | 2.46986 |
| 39 | N  | 6.65688  | 11.58583 | 2.48203 |
| 40 | N  | 4.27550  | 12.07844 | 2.46767 |
| 41 | N  | 4.76569  | 9.69667  | 2.46958 |
| 42 | Co | 6.65642  | 9.69537  | 2.47942 |
| 43 | Co | 15.67133 | 9.69479  | 2.27595 |
| 44 | Co | 6.64664  | 0.68066  | 2.50337 |
| 45 | O  | 14.35373 | 8.43019  | 2.30106 |
| 46 | O  | 14.35305 | 10.95845 | 2.29695 |
| 47 | O  | 16.98906 | 10.95946 | 2.29456 |

|    |   |          |          |         |
|----|---|----------|----------|---------|
| 48 | O | 16.98994 | 8.43129  | 2.29889 |
| 49 | O | 5.38328  | 1.99940  | 2.50477 |
| 50 | O | 7.91415  | 1.99588  | 2.50558 |
| 51 | O | 5.39818  | 17.39502 | 2.50151 |
| 52 | O | 7.92904  | 17.39161 | 2.50300 |
| 53 | O | 16.89223 | 9.72136  | 5.55142 |
| 54 | O | 14.54001 | 9.71800  | 5.56909 |
| 55 | H | 11.95006 | 12.24443 | 2.38085 |
| 56 | H | 11.95133 | 7.14282  | 2.38696 |
| 57 | H | 1.36153  | 12.24739 | 2.37760 |
| 58 | H | 1.36354  | 7.14570  | 2.38611 |
| 59 | H | 9.21095  | 14.98704 | 2.49856 |
| 60 | H | 4.10953  | 14.99376 | 2.49490 |
| 61 | H | 9.20301  | 4.39700  | 2.50239 |
| 62 | H | 4.10154  | 4.40420  | 2.50128 |

COOH@CoPc-*Co-O*

|    | ATOM | X        | Y        | Z       |
|----|------|----------|----------|---------|
| 1  | C    | 5.54477  | 6.96502  | 2.47021 |
| 2  | C    | 5.94624  | 5.57641  | 2.47954 |
| 3  | C    | 7.35980  | 5.57486  | 2.47993 |
| 4  | C    | 7.76411  | 6.96306  | 2.47117 |
| 5  | C    | 9.38773  | 8.58366  | 2.46087 |
| 6  | C    | 10.77688 | 8.98433  | 2.46253 |
| 7  | C    | 10.77691 | 10.40569 | 2.45700 |
| 8  | C    | 9.38819  | 10.80676 | 2.45422 |
| 9  | C    | 7.76638  | 12.42917 | 2.46196 |
| 10 | C    | 7.36462  | 13.81781 | 2.47087 |
| 11 | C    | 5.95103  | 13.81917 | 2.47161 |
| 12 | C    | 5.54701  | 12.43094 | 2.46230 |
| 13 | C    | 3.92353  | 10.81027 | 2.45016 |
| 14 | C    | 2.53442  | 10.40955 | 2.44280 |
| 15 | C    | 2.53440  | 8.98822  | 2.44778 |
| 16 | C    | 3.92302  | 8.58720  | 2.45582 |
| 17 | C    | 5.19895  | 14.99185 | 2.47932 |
| 18 | C    | 5.94044  | 16.18197 | 2.48598 |
| 19 | C    | 7.38094  | 16.18025 | 2.48520 |
| 20 | C    | 8.11952  | 14.98851 | 2.47763 |
| 21 | C    | 1.37119  | 8.23499  | 2.45495 |
| 22 | C    | 0.16916  | 8.97128  | 2.46866 |
| 23 | C    | 0.16878  | 10.42469 | 2.46231 |
| 24 | C    | 1.37045  | 11.16188 | 2.44331 |
| 25 | C    | 8.11147  | 4.40198  | 2.48572 |
| 26 | C    | 7.36955  | 3.21207  | 2.49059 |

|    |    |          |          |         |
|----|----|----------|----------|---------|
| 27 | C  | 5.92901  | 3.21402  | 2.49037 |
| 28 | C  | 5.19084  | 4.40601  | 2.48506 |
| 29 | C  | 11.94038 | 11.15932 | 2.47064 |
| 30 | C  | 13.14052 | 10.42170 | 2.50178 |
| 31 | C  | 13.14082 | 8.97021  | 2.50839 |
| 32 | C  | 11.94093 | 8.23158  | 2.48318 |
| 33 | C  | 15.79680 | 9.70730  | 4.55039 |
| 34 | N  | 6.65503  | 7.80426  | 2.46587 |
| 35 | N  | 4.27329  | 7.31537  | 2.46464 |
| 36 | N  | 9.03615  | 7.31199  | 2.46822 |
| 37 | N  | 8.54768  | 9.69549  | 2.45657 |
| 38 | N  | 9.03788  | 12.07870 | 2.45731 |
| 39 | N  | 6.65612  | 11.58985 | 2.45892 |
| 40 | N  | 4.27504  | 12.08192 | 2.45576 |
| 41 | N  | 4.76347  | 9.69840  | 2.45550 |
| 42 | Co | 6.65566  | 9.69699  | 2.45803 |
| 43 | Co | 15.67403 | 9.69767  | 2.65107 |
| 44 | Co | 6.64535  | 0.68225  | 2.49471 |
| 45 | O  | 14.33999 | 8.42819  | 2.53150 |
| 46 | O  | 14.33927 | 10.96484 | 2.51956 |
| 47 | O  | 17.00176 | 10.96955 | 2.45100 |
| 48 | O  | 17.00262 | 8.42527  | 2.46281 |
| 49 | O  | 5.38016  | 1.99957  | 2.49415 |
| 50 | O  | 7.91471  | 1.99593  | 2.49426 |
| 51 | O  | 5.39510  | 17.39807 | 2.49241 |
| 52 | O  | 7.92962  | 17.39480 | 2.49110 |
| 53 | O  | 16.86752 | 9.71198  | 5.12937 |
| 54 | O  | 14.58842 | 9.70824  | 5.12180 |
| 55 | H  | 11.94193 | 12.24896 | 2.46641 |
| 56 | H  | 11.94330 | 7.14194  | 2.48857 |
| 57 | H  | 1.36833  | 12.25155 | 2.43774 |
| 58 | H  | 1.37026  | 7.14533  | 2.45853 |
| 59 | H  | 9.20936  | 14.99017 | 2.47673 |
| 60 | H  | 4.10910  | 14.99648 | 2.47985 |
| 61 | H  | 9.20131  | 4.39717  | 2.48546 |
| 62 | H  | 4.10098  | 4.40472  | 2.48431 |
| 63 | H  | 14.68115 | 9.71350  | 6.10484 |

CO@CoPc-*Co-O*

|   | ATOM | X       | Y       | Z       |
|---|------|---------|---------|---------|
| 1 | C    | 5.52786 | 6.94050 | 3.03485 |
| 2 | C    | 5.93000 | 5.55219 | 3.05627 |
| 3 | C    | 7.34367 | 5.55081 | 3.05888 |
| 4 | C    | 7.74834 | 6.93875 | 3.03778 |

|    |    |          |          |         |
|----|----|----------|----------|---------|
| 5  | C  | 9.37331  | 8.55937  | 3.03634 |
| 6  | C  | 10.76147 | 8.96123  | 3.07171 |
| 7  | C  | 10.76093 | 10.37939 | 3.07032 |
| 8  | C  | 9.37323  | 10.78062 | 3.03492 |
| 9  | C  | 7.75044  | 12.40311 | 3.03688 |
| 10 | C  | 7.34838  | 13.79150 | 3.05875 |
| 11 | C  | 5.93476  | 13.79298 | 3.05645 |
| 12 | C  | 5.53023  | 12.40500 | 3.03460 |
| 13 | C  | 3.90592  | 10.78410 | 3.03252 |
| 14 | C  | 2.51786  | 10.38328 | 3.06805 |
| 15 | C  | 2.51722  | 8.96515  | 3.06860 |
| 16 | C  | 3.90484  | 8.56290  | 3.03302 |
| 17 | C  | 5.18338  | 14.96595 | 3.08113 |
| 18 | C  | 5.92464  | 16.15554 | 3.10768 |
| 19 | C  | 7.36510  | 16.15361 | 3.11130 |
| 20 | C  | 8.10301  | 14.96211 | 3.08706 |
| 21 | C  | 1.35168  | 8.21358  | 3.13718 |
| 22 | C  | 0.15657  | 8.95250  | 3.19926 |
| 23 | C  | 0.15707  | 10.39888 | 3.19793 |
| 24 | C  | 1.35309  | 11.13626 | 3.13552 |
| 25 | C  | 8.09508  | 4.37794  | 3.08679 |
| 26 | C  | 7.35385  | 3.18832  | 3.11061 |
| 27 | C  | 5.91338  | 3.19012  | 3.10698 |
| 28 | C  | 5.17541  | 4.38145  | 3.08049 |
| 29 | C  | 11.92519 | 11.13306 | 3.13716 |
| 30 | C  | 13.12147 | 10.39646 | 3.20012 |
| 31 | C  | 13.12258 | 8.95009  | 3.20229 |
| 32 | C  | 11.92766 | 8.21042  | 3.14062 |
| 33 | C  | 15.65835 | 9.68081  | 5.30731 |
| 34 | N  | 6.63868  | 7.77971  | 3.02489 |
| 35 | N  | 4.25594  | 7.29097  | 3.03594 |
| 36 | N  | 9.02077  | 7.28776  | 3.04045 |
| 37 | N  | 8.53526  | 9.67022  | 3.01900 |
| 38 | N  | 9.02215  | 12.05255 | 3.03856 |
| 39 | N  | 6.63972  | 11.56400 | 3.02433 |
| 40 | N  | 4.25804  | 12.05579 | 3.03544 |
| 41 | N  | 4.74344  | 9.67311  | 3.01671 |
| 42 | Co | 6.63928  | 9.67168  | 3.01421 |
| 43 | Co | 15.65455 | 9.67647  | 3.57956 |
| 44 | Co | 6.62983  | 0.65718  | 3.14266 |
| 45 | O  | 14.32146 | 8.39798  | 3.27650 |
| 46 | O  | 14.31919 | 10.95150 | 3.27181 |
| 47 | O  | 16.98865 | 10.95301 | 3.27019 |
| 48 | O  | 16.98792 | 8.39942  | 3.27344 |

|    |   |          |          |         |
|----|---|----------|----------|---------|
| 49 | O | 5.36432  | 1.97516  | 3.12856 |
| 50 | O | 7.89940  | 1.97179  | 3.13573 |
| 51 | O | 5.37915  | 17.37217 | 3.12918 |
| 52 | O | 7.91416  | 17.36855 | 3.13660 |
| 53 | O | 15.66253 | 9.68467  | 6.46342 |
| 54 | H | 11.92748 | 12.22264 | 3.14509 |
| 55 | H | 11.93295 | 7.12083  | 3.15116 |
| 56 | H | 1.35006  | 12.22584 | 3.14444 |
| 57 | H | 1.34732  | 7.12400  | 3.14739 |
| 58 | H | 9.19276  | 14.96398 | 3.09106 |
| 59 | H | 4.09363  | 14.97120 | 3.08054 |
| 60 | H | 9.18479  | 4.37277  | 3.09089 |
| 61 | H | 4.08567  | 4.37926  | 3.07976 |

# CoPc-Cu-O

|    | ATOM | X        | Y        | Z       |
|----|------|----------|----------|---------|
| 1  | C    | 5.61635  | 7.02823  | 3.04984 |
| 2  | C    | 6.01607  | 5.64135  | 3.04618 |
| 3  | C    | 7.43851  | 5.64066  | 3.04162 |
| 4  | C    | 7.83956  | 7.02732  | 3.04633 |
| 5  | C    | 9.46069  | 8.64767  | 3.04791 |
| 6  | C    | 10.84798 | 9.04798  | 3.04644 |
| 7  | C    | 10.84802 | 10.47068 | 3.04775 |
| 8  | C    | 9.46092  | 10.87095 | 3.04791 |
| 9  | C    | 7.84059  | 12.49182 | 3.04046 |
| 10 | C    | 7.44081  | 13.87853 | 3.03144 |
| 11 | C    | 6.01842  | 13.87927 | 3.03581 |
| 12 | C    | 5.61752  | 12.49276 | 3.04371 |
| 13 | C    | 3.99648  | 10.87270 | 3.04608 |
| 14 | C    | 2.60925  | 10.47266 | 3.04218 |
| 15 | C    | 2.60922  | 9.05001  | 3.04116 |
| 16 | C    | 3.99625  | 8.64949  | 3.04648 |
| 17 | C    | 5.26862  | 15.04364 | 3.03072 |
| 18 | C    | 5.99406  | 16.25685 | 3.01999 |
| 19 | C    | 7.46830  | 16.25586 | 3.01267 |
| 20 | C    | 8.19210  | 15.04178 | 3.01891 |
| 21 | C    | 1.44604  | 8.29915  | 3.03489 |
| 22 | C    | 0.23191  | 9.02361  | 3.03129 |
| 23 | C    | 0.23174  | 10.49863 | 3.03315 |
| 24 | C    | 1.44582  | 11.22339 | 3.03817 |
| 25 | C    | 8.18811  | 4.47613  | 3.03065 |
| 26 | C    | 7.46271  | 3.26272  | 3.02397 |
| 27 | C    | 5.98847  | 3.26361  | 3.03124 |
| 28 | C    | 5.26479  | 4.47790  | 3.04273 |

|    |    |          |          |         |
|----|----|----------|----------|---------|
| 29 | C  | 12.01121 | 11.22171 | 3.04529 |
| 30 | C  | 13.22544 | 10.49736 | 3.03969 |
| 31 | C  | 13.22557 | 9.02234  | 3.03726 |
| 32 | C  | 12.01151 | 8.29750  | 3.04128 |
| 33 | N  | 6.72825  | 7.87084  | 3.05002 |
| 34 | N  | 4.34568  | 7.37880  | 3.04867 |
| 35 | N  | 9.11052  | 7.37711  | 3.04595 |
| 36 | N  | 8.61764  | 9.75941  | 3.04923 |
| 37 | N  | 9.11132  | 12.14153 | 3.04317 |
| 38 | N  | 6.72878  | 11.64922 | 3.04588 |
| 39 | N  | 4.34656  | 12.14319 | 3.04535 |
| 40 | N  | 4.83956  | 9.76089  | 3.04823 |
| 41 | Co | 6.72856  | 9.76001  | 3.04959 |
| 42 | O  | 14.39765 | 8.45177  | 3.03081 |
| 43 | O  | 14.39736 | 11.06833 | 3.03536 |
| 44 | O  | 17.23828 | 11.06914 | 3.03005 |
| 45 | O  | 17.23874 | 8.45258  | 3.02666 |
| 46 | O  | 5.41660  | 2.09149  | 3.02529 |
| 47 | O  | 8.03296  | 2.08986  | 3.01094 |
| 48 | O  | 5.42374  | 17.42967 | 3.01638 |
| 49 | O  | 8.04043  | 17.42776 | 3.00157 |
| 50 | H  | 12.01130 | 12.31148 | 3.04640 |
| 51 | H  | 12.01208 | 7.20776  | 3.03890 |
| 52 | H  | 1.44531  | 12.31316 | 3.03886 |
| 53 | H  | 1.44606  | 7.20941  | 3.03269 |
| 54 | H  | 9.28189  | 15.04138 | 3.01394 |
| 55 | H  | 4.17880  | 15.04475 | 3.03501 |
| 56 | H  | 9.27792  | 4.47513  | 3.02538 |
| 57 | H  | 4.17496  | 4.47858  | 3.04704 |
| 58 | Cu | 15.81807 | 9.76033  | 3.02842 |
| 59 | Cu | 6.72371  | 0.67023  | 3.00922 |

CO<sub>2</sub>@CoPc-Cu-O

|   | ATOM | X        | Y        | Z       |
|---|------|----------|----------|---------|
| 1 | C    | 5.61823  | 7.02644  | 2.97121 |
| 2 | C    | 6.01800  | 5.63972  | 2.97771 |
| 3 | C    | 7.44042  | 5.63913  | 2.98009 |
| 4 | C    | 7.84130  | 7.02570  | 2.97417 |
| 5 | C    | 9.46274  | 8.64590  | 2.97560 |
| 6 | C    | 10.84955 | 9.04653  | 2.98376 |
| 7 | C    | 10.84924 | 10.46903 | 2.97860 |
| 8 | C    | 9.46286  | 10.86882 | 2.96814 |
| 9 | C    | 7.84279  | 12.48938 | 2.96446 |

|    |    |          |          |         |
|----|----|----------|----------|---------|
| 10 | C  | 7.44313  | 13.87584 | 2.97114 |
| 11 | C  | 6.02075  | 13.87645 | 2.97672 |
| 12 | C  | 5.62003  | 12.49012 | 2.97299 |
| 13 | C  | 3.99879  | 10.87048 | 2.98040 |
| 14 | C  | 2.61212  | 10.47104 | 2.98994 |
| 15 | C  | 2.61150  | 9.04854  | 2.98728 |
| 16 | C  | 3.99789  | 8.64745  | 2.97637 |
| 17 | C  | 5.27061  | 15.04045 | 2.98522 |
| 18 | C  | 5.99617  | 16.25403 | 2.98747 |
| 19 | C  | 7.47110  | 16.25316 | 2.98352 |
| 20 | C  | 8.19492  | 15.03873 | 2.97511 |
| 21 | C  | 1.44738  | 8.29856  | 2.99576 |
| 22 | C  | 0.23378  | 9.02388  | 3.00568 |
| 23 | C  | 0.23432  | 10.49874 | 3.00676 |
| 24 | C  | 1.44883  | 11.22260 | 2.99992 |
| 25 | C  | 8.19044  | 4.47490  | 2.98752 |
| 26 | C  | 7.46514  | 3.26101  | 2.99068 |
| 27 | C  | 5.99024  | 3.26183  | 2.98839 |
| 28 | C  | 5.26650  | 4.47651  | 2.98277 |
| 29 | C  | 12.01216 | 11.22104 | 2.98644 |
| 30 | C  | 13.22677 | 10.49763 | 2.99892 |
| 31 | C  | 13.22746 | 9.02275  | 3.00397 |
| 32 | C  | 12.01391 | 8.29698  | 2.99670 |
| 33 | C  | 6.59402  | 9.88193  | 6.26693 |
| 34 | N  | 6.72998  | 7.86921  | 2.96587 |
| 35 | N  | 4.34764  | 7.37678  | 2.97464 |
| 36 | N  | 9.11209  | 7.37544  | 2.97896 |
| 37 | N  | 8.61953  | 9.75745  | 2.96582 |
| 38 | N  | 9.11328  | 12.13943 | 2.96546 |
| 39 | N  | 6.73118  | 11.64642 | 2.96265 |
| 40 | N  | 4.34937  | 12.14081 | 2.98144 |
| 41 | N  | 4.84173  | 9.75857  | 2.97128 |
| 42 | Co | 6.73060  | 9.75777  | 2.96067 |
| 43 | O  | 14.40004 | 8.45298  | 3.01540 |
| 44 | O  | 14.39889 | 11.06876 | 3.00667 |
| 45 | O  | 17.24072 | 11.06954 | 3.01379 |
| 46 | O  | 17.24002 | 8.45373  | 3.01359 |
| 47 | O  | 5.41897  | 2.08975  | 2.99202 |
| 48 | O  | 8.03491  | 2.08819  | 2.99583 |
| 49 | O  | 5.42636  | 17.42670 | 2.99383 |
| 50 | O  | 8.04258  | 17.42505 | 2.98872 |
| 51 | O  | 7.10540  | 8.82319  | 6.29221 |
| 52 | O  | 6.08251  | 10.94062 | 6.24195 |
| 53 | H  | 12.00957 | 12.31088 | 2.98395 |

|    |    |          |          |         |
|----|----|----------|----------|---------|
| 54 | H  | 12.01419 | 7.20714  | 3.00185 |
| 55 | H  | 1.45079  | 12.31245 | 3.00216 |
| 56 | H  | 1.44767  | 7.20871  | 2.99494 |
| 57 | H  | 9.28482  | 15.03657 | 2.97292 |
| 58 | H  | 4.18071  | 15.03999 | 2.99059 |
| 59 | H  | 9.28038  | 4.47550  | 2.99097 |
| 60 | H  | 4.17656  | 4.47862  | 2.98261 |
| 61 | Cu | 15.81995 | 9.76162  | 3.01498 |
| 62 | Cu | 6.72590  | 0.66791  | 2.99478 |

COOH@*CoPc*-Cu-O

|    | ATOM | X        | Y        | Z       |
|----|------|----------|----------|---------|
| 1  | C    | 5.74673  | 10.76321 | 6.68918 |
| 2  | C    | 6.14742  | 9.37361  | 6.68392 |
| 3  | C    | 7.56689  | 9.37145  | 6.67101 |
| 4  | C    | 7.97179  | 10.75916 | 6.66691 |
| 5  | C    | 9.59596  | 12.38062 | 6.63721 |
| 6  | C    | 10.98268 | 12.78466 | 6.62270 |
| 7  | C    | 10.98052 | 14.20319 | 6.61645 |
| 8  | C    | 9.59134  | 14.60329 | 6.62845 |
| 9  | C    | 7.96545  | 16.22955 | 6.62130 |
| 10 | C    | 7.56627  | 17.62012 | 6.60899 |
| 11 | C    | 6.14661  | 17.62321 | 6.60064 |
| 12 | C    | 5.74145  | 16.23529 | 6.60929 |
| 13 | C    | 4.11894  | 14.61167 | 6.63267 |
| 14 | C    | 2.73213  | 14.20704 | 6.62688 |
| 15 | C    | 2.73366  | 12.78886 | 6.65537 |
| 16 | C    | 4.12197  | 12.38809 | 6.67643 |
| 17 | C    | 5.38787  | 0.60893  | 6.59565 |
| 18 | C    | 6.11508  | 1.82138  | 6.60529 |
| 19 | C    | 7.58563  | 1.81883  | 6.61083 |
| 20 | C    | 8.30923  | 0.60364  | 6.60933 |
| 21 | C    | 1.56903  | 12.03785 | 6.64972 |
| 22 | C    | 0.35522  | 12.76170 | 6.62187 |
| 23 | C    | 0.35421  | 14.23069 | 6.59659 |
| 24 | C    | 1.56694  | 14.95628 | 6.59510 |
| 25 | C    | 8.31677  | 8.20758  | 6.65644 |
| 26 | C    | 7.59037  | 6.99472  | 6.65435 |
| 27 | C    | 6.11999  | 6.99639  | 6.66218 |
| 28 | C    | 5.39573  | 8.21079  | 6.67758 |
| 29 | C    | 12.14467 | 14.95415 | 6.59854 |
| 30 | C    | 13.35850 | 14.22960 | 6.59434 |
| 31 | C    | 13.35988 | 12.76032 | 6.60569 |
| 32 | C    | 12.14745 | 12.03467 | 6.61621 |

|    |    |          |          |          |
|----|----|----------|----------|----------|
| 33 | C  | 6.88780  | 13.54207 | 8.67840  |
| 34 | N  | 6.86078  | 11.59355 | 6.66686  |
| 35 | N  | 4.47757  | 11.11838 | 6.70111  |
| 36 | N  | 9.24254  | 11.10984 | 6.66027  |
| 37 | N  | 8.76214  | 13.48995 | 6.62617  |
| 38 | N  | 9.23472  | 15.87336 | 6.63643  |
| 39 | N  | 6.85108  | 15.40123 | 6.61091  |
| 40 | N  | 4.47094  | 15.88302 | 6.62014  |
| 41 | N  | 4.95326  | 13.50111 | 6.65201  |
| 42 | Co | 6.85611  | 13.49643 | 6.75292  |
| 43 | O  | 14.53335 | 12.18386 | 6.60686  |
| 44 | O  | 14.53140 | 14.80684 | 6.58296  |
| 45 | O  | 17.35930 | 14.80673 | 6.57701  |
| 46 | O  | 17.36090 | 12.18409 | 6.61887  |
| 47 | O  | 5.54344  | 5.82406  | 6.65357  |
| 48 | O  | 8.16464  | 5.82126  | 6.64360  |
| 49 | O  | 5.54140  | 2.99496  | 6.61377  |
| 50 | O  | 8.16232  | 2.99084  | 6.62160  |
| 51 | O  | 7.61641  | 14.30251 | 9.27901  |
| 52 | O  | 6.03725  | 12.66055 | 9.19940  |
| 53 | H  | 12.14348 | 16.04415 | 6.59085  |
| 54 | H  | 12.14759 | 10.94462 | 6.62230  |
| 55 | H  | 1.56701  | 16.04607 | 6.57275  |
| 56 | H  | 1.56979  | 10.94795 | 6.66743  |
| 57 | H  | 9.39920  | 0.60097  | 6.61507  |
| 58 | H  | 4.29789  | 0.60993  | 6.59173  |
| 59 | H  | 9.40673  | 8.20748  | 6.64714  |
| 60 | H  | 4.30577  | 8.21214  | 6.68286  |
| 61 | H  | 6.07654  | 12.69842 | 10.18675 |
| 62 | Cu | 15.94593 | 13.49530 | 6.59317  |
| 63 | Cu | 6.85294  | 4.40793  | 6.63247  |

CO@*CoPc*-Cu-O

|    | ATOM | X        | Y        | Z       |
|----|------|----------|----------|---------|
| 1  | C    | 5.61513  | 7.02062  | 3.09741 |
| 2  | C    | 6.02016  | 5.63665  | 3.07791 |
| 3  | C    | 7.43892  | 5.63593  | 3.07506 |
| 4  | C    | 7.84528  | 7.01969  | 3.09333 |
| 5  | C    | 9.47323  | 8.64639  | 3.09134 |
| 6  | C    | 10.85724 | 9.05202  | 3.07431 |
| 7  | C    | 10.85716 | 10.47034 | 3.07210 |
| 8  | C    | 9.47334  | 10.87585 | 3.08791 |
| 9  | C    | 7.84619  | 12.50313 | 3.08520 |
| 10 | C    | 7.44114  | 13.88697 | 3.06507 |

|    |    |          |          |         |
|----|----|----------|----------|---------|
| 11 | C  | 6.02240  | 13.88765 | 3.06739 |
| 12 | C  | 5.61627  | 12.50400 | 3.08859 |
| 13 | C  | 3.98846  | 10.87749 | 3.09514 |
| 14 | C  | 2.60440  | 10.47220 | 3.07993 |
| 15 | C  | 2.60424  | 9.05391  | 3.08256 |
| 16 | C  | 3.98810  | 8.64811  | 3.09919 |
| 17 | C  | 5.27308  | 15.05306 | 3.02325 |
| 18 | C  | 5.99720  | 16.26524 | 2.99573 |
| 19 | C  | 7.46919  | 16.26433 | 2.99315 |
| 20 | C  | 8.19179  | 15.05133 | 3.01835 |
| 21 | C  | 1.43880  | 8.30407  | 3.04040 |
| 22 | C  | 0.22713  | 9.02814  | 3.01178 |
| 23 | C  | 0.22710  | 10.49812 | 3.00931 |
| 24 | C  | 1.43899  | 11.22216 | 3.03523 |
| 25 | C  | 8.18786  | 4.47036  | 3.02739 |
| 26 | C  | 7.46371  | 3.25811  | 3.00076 |
| 27 | C  | 5.99172  | 3.25906  | 3.00383 |
| 28 | C  | 5.26940  | 4.47221  | 3.03338 |
| 29 | C  | 12.02234 | 11.22062 | 3.02864 |
| 30 | C  | 13.23434 | 10.49693 | 3.00405 |
| 31 | C  | 13.23458 | 9.02694  | 3.00621 |
| 32 | C  | 12.02299 | 8.30251  | 3.03304 |
| 33 | C  | 6.73876  | 9.76732  | 5.04546 |
| 34 | N  | 6.73044  | 7.84877  | 3.07271 |
| 35 | N  | 4.34516  | 7.37782  | 3.12009 |
| 36 | N  | 9.11555  | 7.37622  | 3.11255 |
| 37 | N  | 8.64477  | 9.76120  | 3.06646 |
| 38 | N  | 9.11618  | 12.14607 | 3.10561 |
| 39 | N  | 6.73092  | 11.67495 | 3.06557 |
| 40 | N  | 4.34610  | 12.14762 | 3.11195 |
| 41 | N  | 4.81679  | 9.76259  | 3.07355 |
| 42 | Co | 6.73120  | 9.76219  | 3.29451 |
| 43 | O  | 14.40619 | 8.44664  | 2.98748 |
| 44 | O  | 14.40568 | 11.07775 | 2.98360 |
| 45 | O  | 17.23430 | 11.07855 | 2.98678 |
| 46 | O  | 17.23445 | 8.44744  | 2.99107 |
| 47 | O  | 5.40990  | 2.08939  | 2.98349 |
| 48 | O  | 8.04371  | 2.08758  | 2.97789 |
| 49 | O  | 5.41705  | 17.43570 | 2.97777 |
| 50 | O  | 8.05096  | 17.43397 | 2.97296 |
| 51 | O  | 6.74684  | 9.77182  | 6.19728 |
| 52 | H  | 12.02158 | 12.31052 | 3.01958 |
| 53 | H  | 12.02321 | 7.21261  | 3.02731 |
| 54 | H  | 1.43936  | 12.31205 | 3.02549 |

|    |    |          |          |         |
|----|----|----------|----------|---------|
| 55 | H  | 1.43897  | 7.21417  | 3.03460 |
| 56 | H  | 9.28181  | 15.04977 | 3.00836 |
| 57 | H  | 4.18303  | 15.05299 | 3.01695 |
| 58 | H  | 9.27786  | 4.47053  | 3.01670 |
| 59 | H  | 4.17937  | 4.47402  | 3.02725 |
| 60 | Cu | 15.82017 | 9.76247  | 2.98021 |
| 61 | Cu | 6.72554  | 0.67234  | 2.96867 |

CO<sub>2</sub>@CoPc-**Cu-O**

|    | ATOM | X        | Y        | Z       |
|----|------|----------|----------|---------|
| 1  | C    | 5.61548  | 7.02875  | 3.03770 |
| 2  | C    | 6.01526  | 5.64216  | 3.05365 |
| 3  | C    | 7.43811  | 5.64161  | 3.05416 |
| 4  | C    | 7.83888  | 7.02802  | 3.03795 |
| 5  | C    | 9.46038  | 8.64769  | 2.99933 |
| 6  | C    | 10.84692 | 9.04775  | 2.95987 |
| 7  | C    | 10.84702 | 10.47075 | 2.95859 |
| 8  | C    | 9.46061  | 10.87079 | 2.99799 |
| 9  | C    | 7.83969  | 12.49086 | 3.03648 |
| 10 | C    | 7.44009  | 13.87729 | 3.05318 |
| 11 | C    | 6.01728  | 13.87807 | 3.05547 |
| 12 | C    | 5.61639  | 12.49174 | 3.03941 |
| 13 | C    | 3.99486  | 10.87224 | 3.00298 |
| 14 | C    | 2.60825  | 10.47235 | 2.96452 |
| 15 | C    | 2.60823  | 9.04940  | 2.96325 |
| 16 | C    | 3.99467  | 8.64908  | 3.00147 |
| 17 | C    | 5.26743  | 15.04238 | 3.06170 |
| 18 | C    | 5.99307  | 16.25603 | 3.06607 |
| 19 | C    | 7.46831  | 16.25492 | 3.06361 |
| 20 | C    | 8.19188  | 15.04028 | 3.05671 |
| 21 | C    | 1.44486  | 8.29886  | 2.92417 |
| 22 | C    | 0.23154  | 9.02335  | 2.88021 |
| 23 | C    | 0.23134  | 10.49780 | 2.88294 |
| 24 | C    | 1.44448  | 11.22266 | 2.92761 |
| 25 | C    | 8.18823  | 4.47738  | 3.05927 |
| 26 | C    | 7.46304  | 3.26344  | 3.06433 |
| 27 | C    | 5.98777  | 3.26414  | 3.06349 |
| 28 | C    | 5.26393  | 4.47890  | 3.05779 |
| 29 | C    | 12.01041 | 11.22136 | 2.91924 |
| 30 | C    | 13.22377 | 10.49685 | 2.87516 |
| 31 | C    | 13.22384 | 9.02219  | 2.87775 |
| 32 | C    | 12.01060 | 8.29748  | 2.92253 |
| 33 | C    | 15.86989 | 9.72787  | 6.13256 |
| 34 | N    | 6.72737  | 7.87196  | 3.03292 |

|    |    |          |          |         |
|----|----|----------|----------|---------|
| 35 | N  | 4.34491  | 7.37880  | 3.01860 |
| 36 | N  | 9.10962  | 7.37746  | 3.01829 |
| 37 | N  | 8.61692  | 9.75929  | 3.01443 |
| 38 | N  | 9.11024  | 12.14101 | 3.01588 |
| 39 | N  | 6.72776  | 11.64771 | 3.03302 |
| 40 | N  | 4.34563  | 12.14238 | 3.02127 |
| 41 | N  | 4.83835  | 9.76050  | 3.01730 |
| 42 | Co | 6.72765  | 9.75977  | 3.02694 |
| 43 | O  | 14.39628 | 8.45216  | 2.83539 |
| 44 | O  | 14.39608 | 11.06680 | 2.82907 |
| 45 | O  | 17.23720 | 11.06746 | 2.84088 |
| 46 | O  | 17.23800 | 8.45309  | 2.83444 |
| 47 | O  | 5.41669  | 2.09212  | 3.06615 |
| 48 | O  | 8.03275  | 2.09062  | 3.06753 |
| 49 | O  | 5.42359  | 17.42880 | 3.07013 |
| 50 | O  | 8.03993  | 17.42677 | 3.06587 |
| 51 | O  | 17.04497 | 9.68385  | 6.13630 |
| 52 | O  | 14.69496 | 9.77207  | 6.11272 |
| 53 | H  | 12.00927 | 12.31131 | 2.91720 |
| 54 | H  | 12.00986 | 7.20757  | 2.92286 |
| 55 | H  | 1.44508  | 12.31259 | 2.92793 |
| 56 | H  | 1.44584  | 7.20894  | 2.92193 |
| 57 | H  | 9.28178  | 15.03829 | 3.05169 |
| 58 | H  | 4.17747  | 15.04249 | 3.06080 |
| 59 | H  | 9.27817  | 4.47794  | 3.05699 |
| 60 | H  | 4.17394  | 4.48059  | 3.05421 |
| 61 | Cu | 15.81696 | 9.75945  | 2.80738 |
| 62 | Cu | 6.72362  | 0.67014  | 3.06900 |

COOH@CoPc-**Cu-O**

|    | ATOM | X        | Y        | Z       |
|----|------|----------|----------|---------|
| 1  | C    | 5.59572  | 7.02522  | 3.07644 |
| 2  | C    | 5.99409  | 5.63897  | 3.06560 |
| 3  | C    | 7.41664  | 5.63927  | 3.04221 |
| 4  | C    | 7.81478  | 7.02527  | 3.04232 |
| 5  | C    | 9.42636  | 8.64893  | 3.02905 |
| 6  | C    | 10.81109 | 9.04692  | 3.01958 |
| 7  | C    | 10.81168 | 10.47741 | 3.03392 |
| 8  | C    | 9.42862  | 10.87555 | 3.04328 |
| 9  | C    | 7.81751  | 12.49966 | 3.04789 |
| 10 | C    | 7.42060  | 13.88580 | 3.03977 |
| 11 | C    | 5.99788  | 13.88731 | 3.03927 |
| 12 | C    | 5.59850  | 12.50142 | 3.04789 |
| 13 | C    | 3.98660  | 10.87753 | 3.05442 |

|    |    |          |          |         |
|----|----|----------|----------|---------|
| 14 | C  | 2.60302  | 10.47999 | 3.03698 |
| 15 | C  | 2.60183  | 9.04975  | 3.05953 |
| 16 | C  | 3.98537  | 8.65070  | 3.08099 |
| 17 | C  | 5.24872  | 15.05208 | 3.02953 |
| 18 | C  | 5.97579  | 16.26267 | 3.02238 |
| 19 | C  | 7.45165  | 16.26062 | 3.02204 |
| 20 | C  | 8.17409  | 15.04761 | 3.03015 |
| 21 | C  | 1.45061  | 8.29593  | 3.06243 |
| 22 | C  | 0.22943  | 9.01277  | 2.96862 |
| 23 | C  | 0.23070  | 10.51962 | 2.93637 |
| 24 | C  | 1.45387  | 11.23597 | 3.00931 |
| 25 | C  | 8.16853  | 4.47645  | 3.02144 |
| 26 | C  | 7.44477  | 3.26403  | 3.02410 |
| 27 | C  | 5.96909  | 3.26341  | 3.04600 |
| 28 | C  | 5.24372  | 4.47492  | 3.06778 |
| 29 | C  | 11.96243 | 11.23283 | 3.05917 |
| 30 | C  | 13.18362 | 10.51449 | 3.01289 |
| 31 | C  | 13.18368 | 9.00983  | 2.99706 |
| 32 | C  | 11.96038 | 8.29093  | 3.02381 |
| 33 | C  | 16.07028 | 9.79935  | 5.20658 |
| 34 | N  | 6.70586  | 7.86893  | 3.06089 |
| 35 | N  | 4.32789  | 7.37919  | 3.08955 |
| 36 | N  | 9.08333  | 7.37812  | 3.02664 |
| 37 | N  | 8.58967  | 9.76191  | 3.04573 |
| 38 | N  | 9.08579  | 12.14630 | 3.04746 |
| 39 | N  | 6.70763  | 11.65685 | 3.05231 |
| 40 | N  | 4.33019  | 12.14840 | 3.04622 |
| 41 | N  | 4.82340  | 9.76336  | 3.07501 |
| 42 | Co | 6.70714  | 9.76276  | 3.06147 |
| 43 | O  | 14.33069 | 8.44125  | 2.96070 |
| 44 | O  | 14.33251 | 11.08307 | 2.97464 |
| 45 | O  | 17.26977 | 11.09085 | 2.82056 |
| 46 | O  | 17.26560 | 8.43956  | 2.88517 |
| 47 | O  | 5.39929  | 2.08952  | 3.04306 |
| 48 | O  | 8.01608  | 2.09088  | 3.00692 |
| 49 | O  | 5.40728  | 17.43711 | 3.01638 |
| 50 | O  | 8.02443  | 17.43310 | 3.01440 |
| 51 | O  | 17.18699 | 9.82817  | 5.68012 |
| 52 | O  | 14.90423 | 9.78161  | 5.83376 |
| 53 | H  | 11.95573 | 12.32213 | 3.08731 |
| 54 | H  | 11.95456 | 7.20135  | 3.02908 |
| 55 | H  | 1.46078  | 12.32563 | 3.00390 |
| 56 | H  | 1.45499  | 7.20680  | 3.09847 |
| 57 | H  | 9.26395  | 15.04376 | 3.02879 |

|    |    |          |          |         |
|----|----|----------|----------|---------|
| 58 | H  | 4.15884  | 15.05295 | 3.02747 |
| 59 | H  | 9.25824  | 4.47911  | 3.00242 |
| 60 | H  | 4.15395  | 4.47560  | 3.08330 |
| 61 | H  | 15.02869 | 9.79515  | 6.81632 |
| 62 | Cu | 15.81046 | 9.76994  | 3.27193 |
| 63 | Cu | 6.70852  | 0.67325  | 3.01648 |

CO@CoPc-*Cu-O*

|    | ATOM | X        | Y        | Z       |
|----|------|----------|----------|---------|
| 1  | C    | 5.63959  | 7.02947  | 3.00852 |
| 2  | C    | 6.03874  | 5.64266  | 3.01798 |
| 3  | C    | 7.46100  | 5.64160  | 3.03820 |
| 4  | C    | 7.86216  | 7.02825  | 3.03888 |
| 5  | C    | 9.48242  | 8.64889  | 3.05653 |
| 6  | C    | 10.86928 | 9.04923  | 3.06745 |
| 7  | C    | 10.86947 | 10.47139 | 3.06825 |
| 8  | C    | 9.48279  | 10.87210 | 3.05615 |
| 9  | C    | 7.86346  | 12.49357 | 3.03449 |
| 10 | C    | 7.46353  | 13.88037 | 3.03133 |
| 11 | C    | 6.04128  | 13.88078 | 3.01148 |
| 12 | C    | 5.64082  | 12.49426 | 3.00452 |
| 13 | C    | 4.02055  | 10.87396 | 2.98926 |
| 14 | C    | 2.63346  | 10.47417 | 2.98081 |
| 15 | C    | 2.63355  | 9.05088  | 2.98015 |
| 16 | C    | 4.02036  | 8.65078  | 2.98951 |
| 17 | C    | 5.29011  | 15.04406 | 3.00641 |
| 18 | C    | 6.01463  | 16.25789 | 3.02298 |
| 19 | C    | 7.48912  | 16.25781 | 3.04339 |
| 20 | C    | 8.21421  | 15.04409 | 3.04729 |
| 21 | C    | 1.47177  | 8.29943  | 2.97914 |
| 22 | C    | 0.25668  | 9.02333  | 2.98065 |
| 23 | C    | 0.25636  | 10.50050 | 2.98312 |
| 24 | C    | 1.47121  | 11.22507 | 2.98174 |
| 25 | C    | 8.21005  | 4.47676  | 3.05477 |
| 26 | C    | 7.48346  | 3.26379  | 3.04983 |
| 27 | C    | 6.00898  | 3.26554  | 3.02942 |
| 28 | C    | 5.28614  | 4.48035  | 3.01329 |
| 29 | C    | 12.03273 | 11.22210 | 3.07312 |
| 30 | C    | 13.24663 | 10.49756 | 3.06661 |
| 31 | C    | 13.24658 | 9.02291  | 3.06327 |
| 32 | C    | 12.03259 | 8.29847  | 3.06975 |
| 33 | C    | 15.63328 | 9.72457  | 5.75045 |
| 34 | N    | 6.75131  | 7.87206  | 3.02131 |
| 35 | N    | 4.36917  | 7.38010  | 2.99314 |

|    |    |          |          |         |
|----|----|----------|----------|---------|
| 36 | N  | 9.13296  | 7.37804  | 3.05421 |
| 37 | N  | 8.63942  | 9.76067  | 3.04701 |
| 38 | N  | 9.13396  | 12.14305 | 3.05161 |
| 39 | N  | 6.75196  | 11.65078 | 3.01828 |
| 40 | N  | 4.37012  | 12.14446 | 2.99107 |
| 41 | N  | 4.86341  | 9.76219  | 2.99683 |
| 42 | Co | 6.75128  | 9.76140  | 3.01969 |
| 43 | O  | 14.41869 | 8.45104  | 3.04762 |
| 44 | O  | 14.41871 | 11.06950 | 3.05640 |
| 45 | O  | 17.26498 | 11.07154 | 2.98450 |
| 46 | O  | 17.26578 | 8.45143  | 2.97811 |
| 47 | O  | 5.43624  | 2.09388  | 3.02746 |
| 48 | O  | 8.05232  | 2.09038  | 3.06264 |
| 49 | O  | 5.44349  | 17.43029 | 3.02243 |
| 50 | O  | 8.05965  | 17.43028 | 3.05822 |
| 51 | O  | 14.64294 | 9.67816  | 6.32241 |
| 52 | H  | 12.03211 | 12.31196 | 3.07414 |
| 53 | H  | 12.03179 | 7.20867  | 3.06808 |
| 54 | H  | 1.47210  | 12.31503 | 2.98515 |
| 55 | H  | 1.47340  | 7.20952  | 2.98051 |
| 56 | H  | 9.30381  | 15.04351 | 3.06385 |
| 57 | H  | 4.20038  | 15.04290 | 2.99229 |
| 58 | H  | 9.29970  | 4.47604  | 3.07133 |
| 59 | H  | 4.19639  | 4.48319  | 2.99874 |
| 60 | Cu | 15.84278 | 9.76053  | 3.04944 |
| 61 | Cu | 6.74201  | 0.67189  | 3.04546 |

# CoPc-Zn-O

|    | ATOM | X        | Y        | Z       |
|----|------|----------|----------|---------|
| 1  | C    | 5.86844  | 7.15755  | 3.04368 |
| 2  | C    | 6.26866  | 5.77118  | 3.03850 |
| 3  | C    | 7.69151  | 5.77118  | 3.02894 |
| 4  | C    | 8.09215  | 7.15755  | 3.03241 |
| 5  | C    | 9.71370  | 8.77881  | 3.03193 |
| 6  | C    | 11.10011 | 9.17932  | 3.03044 |
| 7  | C    | 11.10005 | 10.60216 | 3.02794 |
| 8  | C    | 9.71366  | 11.00254 | 3.02902 |
| 9  | C    | 8.09219  | 12.62372 | 3.02778 |
| 10 | C    | 7.69166  | 14.01022 | 3.02371 |
| 11 | C    | 6.26873  | 14.01018 | 3.03205 |
| 12 | C    | 5.86862  | 12.62369 | 3.03750 |
| 13 | C    | 4.24753  | 11.00251 | 3.04342 |
| 14 | C    | 2.86104  | 10.60233 | 3.04364 |
| 15 | C    | 2.86095  | 9.17939  | 3.04733 |

|    |    |          |          |         |
|----|----|----------|----------|---------|
| 16 | C  | 4.24740  | 8.77899  | 3.04784 |
| 17 | C  | 5.52128  | 15.17449 | 3.03275 |
| 18 | C  | 6.23225  | 16.40091 | 3.02338 |
| 19 | C  | 7.72814  | 16.40088 | 3.01211 |
| 20 | C  | 8.43915  | 15.17439 | 3.01317 |
| 21 | C  | 1.69677  | 8.43184  | 3.04669 |
| 22 | C  | 0.47028  | 9.14284  | 3.04099 |
| 23 | C  | 0.47036  | 10.63883 | 3.03589 |
| 24 | C  | 1.69683  | 11.34983 | 3.03811 |
| 25 | C  | 8.43906  | 4.60725  | 3.01722 |
| 26 | C  | 7.72818  | 3.38067  | 3.01590 |
| 27 | C  | 6.23233  | 3.38055  | 3.02878 |
| 28 | C  | 5.52133  | 4.60693  | 3.03955 |
| 29 | C  | 12.26425 | 11.34952 | 3.02441 |
| 30 | C  | 13.49071 | 10.63857 | 3.02415 |
| 31 | C  | 13.49077 | 9.14270  | 3.02777 |
| 32 | C  | 12.26425 | 8.43180  | 3.03036 |
| 33 | N  | 6.98029  | 8.00181  | 3.03944 |
| 34 | N  | 4.59774  | 7.50815  | 3.04884 |
| 35 | N  | 9.36301  | 7.50801  | 3.03030 |
| 36 | N  | 8.86943  | 9.89074  | 3.03277 |
| 37 | N  | 9.36304  | 12.27331 | 3.02556 |
| 38 | N  | 6.98036  | 11.77968 | 3.03522 |
| 39 | N  | 4.59787  | 12.27331 | 3.04143 |
| 40 | N  | 5.09149  | 9.89081  | 3.04454 |
| 41 | Co | 6.98020  | 9.89090  | 3.03864 |
| 42 | O  | 14.64240 | 8.55335  | 3.02839 |
| 43 | O  | 14.64219 | 11.22830 | 3.02105 |
| 44 | O  | 17.65137 | 11.22827 | 3.02857 |
| 45 | O  | 17.65117 | 8.55364  | 3.03860 |
| 46 | O  | 5.64274  | 2.22900  | 3.02867 |
| 47 | O  | 8.31748  | 2.22915  | 3.00394 |
| 48 | O  | 5.64283  | 17.55258 | 3.02364 |
| 49 | O  | 8.31717  | 17.55264 | 3.00200 |
| 50 | H  | 12.26100 | 12.43953 | 3.02180 |
| 51 | H  | 12.26048 | 7.34174  | 3.03236 |
| 52 | H  | 1.70006  | 12.43992 | 3.03378 |
| 53 | H  | 1.70026  | 7.34167  | 3.04890 |
| 54 | H  | 9.52931  | 15.17062 | 3.00533 |
| 55 | H  | 4.43118  | 15.17155 | 3.04009 |
| 56 | H  | 9.52910  | 4.61131  | 3.00818 |
| 57 | H  | 4.43133  | 4.60984  | 3.04764 |
| 58 | Zn | 16.14647 | 9.89127  | 3.02497 |
| 59 | Zn | 6.97967  | 0.72489  | 3.00936 |

CO<sub>2</sub>@CoPc-Zn-O

|    | ATOM | X        | Y        | Z       |
|----|------|----------|----------|---------|
| 1  | C    | 5.87060  | 7.15792  | 2.94856 |
| 2  | C    | 6.27057  | 5.77175  | 2.97047 |
| 3  | C    | 7.69386  | 5.77129  | 2.96556 |
| 4  | C    | 8.09433  | 7.15778  | 2.94199 |
| 5  | C    | 9.71536  | 8.77925  | 2.93395 |
| 6  | C    | 11.10182 | 9.17968  | 2.95528 |
| 7  | C    | 11.10170 | 10.60298 | 2.94729 |
| 8  | C    | 9.71544  | 11.00278 | 2.92211 |
| 9  | C    | 8.09445  | 12.62400 | 2.92268 |
| 10 | C    | 7.69358  | 14.01030 | 2.94604 |
| 11 | C    | 6.27052  | 14.00946 | 2.95803 |
| 12 | C    | 5.87097  | 12.62311 | 2.93966 |
| 13 | C    | 4.24984  | 11.00214 | 2.95011 |
| 14 | C    | 2.86345  | 10.60269 | 2.97640 |
| 15 | C    | 2.86293  | 9.17958  | 2.97781 |
| 16 | C    | 4.24928  | 8.77880  | 2.95188 |
| 17 | C    | 5.52199  | 15.17263 | 2.99287 |
| 18 | C    | 6.23248  | 16.39910 | 3.01815 |
| 19 | C    | 7.72836  | 16.40015 | 3.00529 |
| 20 | C    | 8.44049  | 15.17472 | 2.96809 |
| 21 | C    | 1.69873  | 8.43257  | 3.00760 |
| 22 | C    | 0.47302  | 9.14458  | 3.03627 |
| 23 | C    | 0.47358  | 10.64049 | 3.03385 |
| 24 | C    | 1.69995  | 11.35112 | 3.00372 |
| 25 | C    | 8.44080  | 4.60703  | 2.98919 |
| 26 | C    | 7.72869  | 3.38130  | 3.01983 |
| 27 | C    | 6.23266  | 3.38214  | 3.02680 |
| 28 | C    | 5.52213  | 4.60858  | 3.00076 |
| 29 | C    | 12.26509 | 11.35117 | 2.97450 |
| 30 | C    | 13.49117 | 10.64042 | 3.01232 |
| 31 | C    | 13.49141 | 9.14441  | 3.01982 |
| 32 | C    | 12.26561 | 8.43257  | 2.99017 |
| 33 | C    | 7.06319  | 10.02287 | 6.15542 |
| 34 | N    | 6.98257  | 8.00183  | 2.93069 |
| 35 | N    | 4.59981  | 7.50811  | 2.95472 |
| 36 | N    | 9.36498  | 7.50849  | 2.94176 |
| 37 | N    | 8.87147  | 9.89088  | 2.91471 |
| 38 | N    | 9.36519  | 12.27362 | 2.91991 |
| 39 | N    | 6.98306  | 11.77942 | 2.91874 |
| 40 | N    | 4.60046  | 12.27267 | 2.95071 |
| 41 | N    | 5.09348  | 9.89013  | 2.93380 |

|    |    |          |          |         |
|----|----|----------|----------|---------|
| 42 | Co | 6.98263  | 9.89043  | 2.91358 |
| 43 | O  | 14.64262 | 8.55604  | 3.05562 |
| 44 | O  | 14.64215 | 11.22975 | 3.04307 |
| 45 | O  | 17.65486 | 11.22978 | 3.06023 |
| 46 | O  | 17.65390 | 8.55639  | 3.06519 |
| 47 | O  | 5.64302  | 2.23128  | 3.05737 |
| 48 | O  | 8.31670  | 2.22960  | 3.04329 |
| 49 | O  | 5.64296  | 17.55004 | 3.05404 |
| 50 | O  | 8.31640  | 17.55198 | 3.03091 |
| 51 | O  | 7.98926  | 9.29780  | 6.16381 |
| 52 | O  | 6.13747  | 10.74831 | 6.14947 |
| 53 | H  | 12.26188 | 12.44121 | 2.97157 |
| 54 | H  | 12.26276 | 7.34263  | 2.99905 |
| 55 | H  | 1.70351  | 12.44124 | 3.00399 |
| 56 | H  | 1.70159  | 7.34255  | 3.01105 |
| 57 | H  | 9.53050  | 15.17230 | 2.96124 |
| 58 | H  | 4.43193  | 15.16878 | 3.00475 |
| 59 | H  | 9.53079  | 4.60950  | 2.98672 |
| 60 | H  | 4.43211  | 4.61241  | 3.00719 |
| 61 | Zn | 16.14859 | 9.89358  | 3.07618 |
| 62 | Zn | 6.97833  | 0.72400  | 3.06527 |

COOH@*CoPc*-Zn-O

|    | ATOM | X        | Y        | Z       |
|----|------|----------|----------|---------|
| 1  | C    | 5.86414  | 7.15391  | 3.08146 |
| 2  | C    | 6.26527  | 5.76559  | 3.06833 |
| 3  | C    | 7.68469  | 5.76377  | 3.07398 |
| 4  | C    | 8.08980  | 7.15008  | 3.08630 |
| 5  | C    | 9.71499  | 8.77215  | 3.07404 |
| 6  | C    | 11.10182 | 9.17727  | 3.07228 |
| 7  | C    | 11.09879 | 10.59696 | 3.05900 |
| 8  | C    | 9.70959  | 10.99636 | 3.05244 |
| 9  | C    | 8.08325  | 12.62349 | 3.02075 |
| 10 | C    | 7.68387  | 14.01282 | 2.99777 |
| 11 | C    | 6.26408  | 14.01563 | 2.99408 |
| 12 | C    | 5.85881  | 12.62906 | 3.01251 |
| 13 | C    | 4.23573  | 11.00475 | 3.04371 |
| 14 | C    | 2.84912  | 10.60023 | 3.04726 |
| 15 | C    | 2.85036  | 9.18078  | 3.06429 |
| 16 | C    | 4.23863  | 8.77937  | 3.07181 |
| 17 | C    | 5.51784  | 15.18095 | 2.98167 |
| 18 | C    | 6.23056  | 16.40569 | 2.97691 |
| 19 | C    | 7.72176  | 16.40392 | 2.97537 |
| 20 | C    | 8.43235  | 15.17697 | 2.98364 |

|    |    |          |          |         |
|----|----|----------|----------|---------|
| 21 | C  | 1.68527  | 8.43329  | 3.06524 |
| 22 | C  | 0.45934  | 9.14498  | 3.05618 |
| 23 | C  | 0.45895  | 10.63590 | 3.04038 |
| 24 | C  | 1.68417  | 11.34752 | 3.03312 |
| 25 | C  | 8.43148  | 4.59851  | 3.05690 |
| 26 | C  | 7.71939  | 3.37379  | 3.03350 |
| 27 | C  | 6.22843  | 3.37498  | 3.02396 |
| 28 | C  | 5.51742  | 4.60117  | 3.04096 |
| 29 | C  | 12.26239 | 11.34601 | 3.04607 |
| 30 | C  | 13.48939 | 10.63613 | 3.05034 |
| 31 | C  | 13.49184 | 9.14507  | 3.06541 |
| 32 | C  | 12.26745 | 8.43158  | 3.07482 |
| 33 | C  | 6.99344  | 9.95152  | 5.08765 |
| 34 | N  | 6.97838  | 7.98563  | 3.07838 |
| 35 | N  | 4.59427  | 7.50953  | 3.08614 |
| 36 | N  | 9.36122  | 7.50142  | 3.09579 |
| 37 | N  | 8.88034  | 9.88176  | 3.04716 |
| 38 | N  | 9.35264  | 12.26619 | 3.04627 |
| 39 | N  | 6.96854  | 11.79418 | 3.01295 |
| 40 | N  | 4.58789  | 12.27593 | 3.03241 |
| 41 | N  | 5.07053  | 9.89317  | 3.05006 |
| 42 | Co | 6.97305  | 9.88955  | 3.16181 |
| 43 | O  | 14.64481 | 8.55274  | 3.06885 |
| 44 | O  | 14.64069 | 11.23157 | 3.04154 |
| 45 | O  | 17.63905 | 11.22994 | 3.03433 |
| 46 | O  | 17.63943 | 8.55150  | 3.06253 |
| 47 | O  | 5.63385  | 2.22326  | 3.00028 |
| 48 | O  | 8.31309  | 2.22114  | 3.01792 |
| 49 | O  | 5.63730  | 17.55841 | 2.97695 |
| 50 | O  | 8.31620  | 17.55576 | 2.97165 |
| 51 | O  | 7.74012  | 10.69390 | 5.68917 |
| 52 | O  | 6.11065  | 9.10305  | 5.61164 |
| 53 | H  | 12.25758 | 12.43605 | 3.03360 |
| 54 | H  | 12.26571 | 7.34152  | 3.08372 |
| 55 | H  | 1.68760  | 12.43758 | 3.01945 |
| 56 | H  | 1.68822  | 7.34313  | 3.07474 |
| 57 | H  | 9.52253  | 15.17269 | 2.98463 |
| 58 | H  | 4.42772  | 15.17840 | 2.98165 |
| 59 | H  | 9.52160  | 4.60159  | 3.06024 |
| 60 | H  | 4.42730  | 4.60479  | 3.03155 |
| 61 | H  | 6.13877  | 9.15767  | 6.59859 |
| 62 | Zn | 16.14105 | 9.89287  | 3.05364 |
| 63 | Zn | 6.97504  | 0.72392  | 2.98797 |

## CO@CoPc-Zn-O

|    | ATOM | X        | Y        | Z       |
|----|------|----------|----------|---------|
| 1  | C    | 5.87141  | 7.14941  | 3.11314 |
| 2  | C    | 6.27550  | 5.76456  | 3.08891 |
| 3  | C    | 7.69484  | 5.76377  | 3.07972 |
| 4  | C    | 8.10058  | 7.14865  | 3.10002 |
| 5  | C    | 9.72895  | 8.77746  | 3.09193 |
| 6  | C    | 11.11355 | 9.18262  | 3.06815 |
| 7  | C    | 11.11308 | 10.60188 | 3.06458 |
| 8  | C    | 9.72859  | 11.00662 | 3.08712 |
| 9  | C    | 8.10068  | 12.63554 | 3.09120 |
| 10 | C    | 7.69518  | 14.02021 | 3.07068 |
| 11 | C    | 6.27589  | 14.01963 | 3.08039 |
| 12 | C    | 5.87171  | 12.63488 | 3.10475 |
| 13 | C    | 4.24289  | 11.00657 | 3.11334 |
| 14 | C    | 2.85782  | 10.60187 | 3.09493 |
| 15 | C    | 2.85750  | 9.18248  | 3.09771 |
| 16 | C    | 4.24250  | 8.77751  | 3.11753 |
| 17 | C    | 5.52833  | 15.18431 | 3.03694 |
| 18 | C    | 6.23764  | 16.40902 | 2.99256 |
| 19 | C    | 7.72836  | 16.40983 | 2.98104 |
| 20 | C    | 8.44042  | 15.18602 | 3.01595 |
| 21 | C    | 1.69202  | 8.43642  | 3.05059 |
| 22 | C    | 0.46796  | 9.14772  | 3.00999 |
| 23 | C    | 0.46840  | 10.63853 | 3.00767 |
| 24 | C    | 1.69293  | 11.34877 | 3.04508 |
| 25 | C    | 8.43990  | 4.59797  | 3.02382 |
| 26 | C    | 7.72774  | 3.37440  | 2.98672 |
| 27 | C    | 6.23692  | 3.37557  | 2.99666 |
| 28 | C    | 5.52759  | 4.60032  | 3.04313 |
| 29 | C    | 12.27786 | 11.34896 | 3.01614 |
| 30 | C    | 13.50252 | 10.63880 | 2.98409 |
| 31 | C    | 13.50330 | 9.14804  | 2.98777 |
| 32 | C    | 12.27932 | 8.43681  | 3.02369 |
| 33 | C    | 6.99799  | 9.90012  | 5.08417 |
| 34 | N    | 6.98594  | 7.97681  | 3.08831 |
| 35 | N    | 4.60071  | 7.50700  | 3.13849 |
| 36 | N    | 9.37133  | 7.50660  | 3.11378 |
| 37 | N    | 8.90066  | 9.89182  | 3.07331 |
| 38 | N    | 9.37136  | 12.27756 | 3.10538 |
| 39 | N    | 6.98612  | 11.80721 | 3.08005 |
| 40 | N    | 4.60112  | 12.27704 | 3.13074 |
| 41 | N    | 5.07035  | 9.89178  | 3.09459 |
| 42 | Co   | 6.98707  | 9.89255  | 3.31743 |

|    |    |          |          |         |
|----|----|----------|----------|---------|
| 43 | O  | 14.65422 | 8.55083  | 2.96326 |
| 44 | O  | 14.65279 | 11.23718 | 2.95702 |
| 45 | O  | 17.65062 | 11.23629 | 2.97528 |
| 46 | O  | 17.64974 | 8.55094  | 2.97862 |
| 47 | O  | 5.63811  | 2.22570  | 2.96594 |
| 48 | O  | 8.32378  | 2.22344  | 2.94785 |
| 49 | O  | 5.63882  | 17.55915 | 2.96539 |
| 50 | O  | 8.32463  | 17.56080 | 2.94346 |
| 51 | O  | 7.00730  | 9.90859  | 6.23704 |
| 52 | H  | 12.27332 | 12.43887 | 3.00950 |
| 53 | H  | 12.27640 | 7.34679  | 3.02279 |
| 54 | H  | 1.69699  | 12.43869 | 3.03861 |
| 55 | H  | 1.69485  | 7.34636  | 3.04840 |
| 56 | H  | 9.53031  | 15.18322 | 3.00455 |
| 57 | H  | 4.43829  | 15.17977 | 3.04106 |
| 58 | H  | 9.52979  | 4.60049  | 3.01231 |
| 59 | H  | 4.43752  | 4.60500  | 3.04629 |
| 60 | Zn | 16.15150 | 9.89476  | 2.95650 |
| 61 | Zn | 6.97949  | 0.72602  | 2.93700 |

CO<sub>2</sub>@CoPc-**Zn-O**

|    | ATOM | X        | Y        | Z       |
|----|------|----------|----------|---------|
| 1  | C    | 5.81408  | 7.15793  | 3.02379 |
| 2  | C    | 6.21492  | 5.77176  | 3.04375 |
| 3  | C    | 7.63789  | 5.77253  | 3.03820 |
| 4  | C    | 8.03789  | 7.15867  | 3.01905 |
| 5  | C    | 9.65958  | 8.77906  | 2.98566 |
| 6  | C    | 11.04593 | 9.17952  | 2.95735 |
| 7  | C    | 11.04549 | 10.60267 | 2.95195 |
| 8  | C    | 9.65923  | 11.00268 | 2.97873 |
| 9  | C    | 8.03807  | 12.62355 | 3.01183 |
| 10 | C    | 7.63813  | 14.00982 | 3.03207 |
| 11 | C    | 6.21520  | 14.01047 | 3.04804 |
| 12 | C    | 5.81427  | 12.62416 | 3.03011 |
| 13 | C    | 4.19370  | 11.00278 | 2.99951 |
| 14 | C    | 2.80775  | 10.60261 | 2.97075 |
| 15 | C    | 2.80740  | 9.17988  | 2.96494 |
| 16 | C    | 4.19335  | 8.77900  | 2.99244 |
| 17 | C    | 5.46890  | 15.17527 | 3.07032 |
| 18 | C    | 6.18154  | 16.40098 | 3.07655 |
| 19 | C    | 7.67725  | 16.39993 | 3.05428 |
| 20 | C    | 8.38698  | 15.17305 | 3.03253 |
| 21 | C    | 1.64325  | 8.43280  | 2.93662 |
| 22 | C    | 0.41787  | 9.14457  | 2.91329 |
| 23 | C    | 0.41833  | 10.64012 | 2.91989 |

|    |    |          |          |         |
|----|----|----------|----------|---------|
| 24 | C  | 1.64411  | 11.35065 | 2.94940 |
| 25 | C  | 8.38680  | 4.60951  | 3.04494 |
| 26 | C  | 7.67697  | 3.38270  | 3.06161 |
| 27 | C  | 6.18120  | 3.38146  | 3.07220 |
| 28 | C  | 5.46850  | 4.60703  | 3.06049 |
| 29 | C  | 12.20898 | 11.35068 | 2.92656 |
| 30 | C  | 13.43562 | 10.64019 | 2.90734 |
| 31 | C  | 13.43625 | 9.14412  | 2.91263 |
| 32 | C  | 12.21014 | 8.43242  | 2.93782 |
| 33 | C  | 17.24028 | 9.79088  | 6.34209 |
| 34 | N  | 6.92592  | 8.00234  | 3.01521 |
| 35 | N  | 4.54332  | 7.50800  | 3.00743 |
| 36 | N  | 9.30870  | 7.50852  | 3.00192 |
| 37 | N  | 8.81551  | 9.89071  | 2.99468 |
| 38 | N  | 9.30868  | 12.27339 | 2.98980 |
| 39 | N  | 6.92606  | 11.77983 | 3.01491 |
| 40 | N  | 4.54351  | 12.27379 | 3.01922 |
| 41 | N  | 5.03770  | 9.89069  | 3.00535 |
| 42 | Co | 6.92621  | 9.89096  | 3.00861 |
| 43 | O  | 14.58816 | 8.55592  | 2.89433 |
| 44 | O  | 14.58691 | 11.22975 | 2.88614 |
| 45 | O  | 17.59905 | 11.22997 | 2.90094 |
| 46 | O  | 17.59803 | 8.55607  | 2.88977 |
| 47 | O  | 5.59364  | 2.22919  | 3.08964 |
| 48 | O  | 8.26735  | 2.23158  | 3.06674 |
| 49 | O  | 5.59410  | 17.55330 | 3.09823 |
| 50 | O  | 8.26742  | 17.55120 | 3.05511 |
| 51 | O  | 16.26490 | 9.86108  | 5.68618 |
| 52 | O  | 18.21396 | 9.72108  | 6.99336 |
| 53 | H  | 12.20437 | 12.44070 | 2.92235 |
| 54 | H  | 12.20683 | 7.34233  | 2.94206 |
| 55 | H  | 1.64847  | 12.44064 | 2.95448 |
| 56 | H  | 1.64657  | 7.34276  | 2.93196 |
| 57 | H  | 9.47688  | 15.16785 | 3.01515 |
| 58 | H  | 4.37888  | 15.17264 | 3.08168 |
| 59 | H  | 9.47680  | 4.61481  | 3.03567 |
| 60 | H  | 4.37844  | 4.60952  | 3.06379 |
| 61 | Zn | 16.09306 | 9.89405  | 2.88369 |
| 62 | Zn | 6.93249  | 0.72524  | 3.08461 |

COOH@CoPc-**Zn-O**

|   | ATOM | X       | Y       | Z       |
|---|------|---------|---------|---------|
| 1 | C    | 5.89595 | 6.89886 | 8.60777 |
| 2 | C    | 6.29822 | 5.51359 | 8.61565 |

|    |    |          |          |          |
|----|----|----------|----------|----------|
| 3  | C  | 7.72118  | 5.51472  | 8.60552  |
| 4  | C  | 8.12154  | 6.90040  | 8.60392  |
| 5  | C  | 9.74811  | 8.51977  | 8.62263  |
| 6  | C  | 11.14027 | 8.91898  | 8.65927  |
| 7  | C  | 11.14049 | 10.34248 | 8.65530  |
| 8  | C  | 9.74821  | 10.74154 | 8.61791  |
| 9  | C  | 8.12145  | 12.36064 | 8.59578  |
| 10 | C  | 7.72091  | 13.74609 | 8.59619  |
| 11 | C  | 6.29789  | 13.74732 | 8.60513  |
| 12 | C  | 5.89564  | 12.36208 | 8.59806  |
| 13 | C  | 4.26893  | 10.74468 | 8.58400  |
| 14 | C  | 2.87285  | 10.34984 | 8.56812  |
| 15 | C  | 2.87318  | 8.91069  | 8.57327  |
| 16 | C  | 4.26920  | 8.51629  | 8.59045  |
| 17 | C  | 5.55133  | 14.91224 | 8.62026  |
| 18 | C  | 6.26297  | 16.13858 | 8.62384  |
| 19 | C  | 7.75815  | 16.13820 | 8.60788  |
| 20 | C  | 8.46846  | 14.91150 | 8.59432  |
| 21 | C  | 1.72873  | 8.15634  | 8.56274  |
| 22 | C  | 0.48557  | 8.86837  | 8.50700  |
| 23 | C  | 0.48507  | 10.39004 | 8.49888  |
| 24 | C  | 1.72800  | 11.10342 | 8.55001  |
| 25 | C  | 8.46857  | 4.34927  | 8.60230  |
| 26 | C  | 7.75809  | 3.12261  | 8.61453  |
| 27 | C  | 6.26318  | 3.12230  | 8.63181  |
| 28 | C  | 5.55159  | 4.34875  | 8.63051  |
| 29 | C  | 12.30293 | 11.08852 | 8.70667  |
| 30 | C  | 13.53255 | 10.37694 | 8.77130  |
| 31 | C  | 13.53227 | 8.88451  | 8.77679  |
| 32 | C  | 12.30254 | 8.17294  | 8.71530  |
| 33 | C  | 17.09698 | 9.65181  | 11.03320 |
| 34 | N  | 7.00708  | 7.74459  | 8.60237  |
| 35 | N  | 4.62277  | 7.24842  | 8.60195  |
| 36 | N  | 9.39433  | 7.25044  | 8.61439  |
| 37 | N  | 8.90976  | 9.63063  | 8.60745  |
| 38 | N  | 9.39429  | 12.01080 | 8.60622  |
| 39 | N  | 7.00689  | 11.51653 | 8.59536  |
| 40 | N  | 4.62240  | 12.01257 | 8.59104  |
| 41 | N  | 5.10015  | 9.63057  | 8.59201  |
| 42 | Co | 7.00239  | 9.63057  | 8.59771  |
| 43 | O  | 14.68005 | 8.29511  | 8.85109  |
| 44 | O  | 14.68052 | 10.96630 | 8.84011  |
| 45 | O  | 17.68497 | 10.95775 | 8.44798  |
| 46 | O  | 17.68561 | 8.29917  | 8.46537  |

|    |    |          |          |          |
|----|----|----------|----------|----------|
| 47 | O  | 5.67391  | 1.97062  | 8.64614  |
| 48 | O  | 8.34704  | 1.97025  | 8.61275  |
| 49 | O  | 5.67338  | 17.29001 | 8.63999  |
| 50 | O  | 8.34749  | 17.29030 | 8.60883  |
| 51 | O  | -0.01739 | 9.65362  | 11.16176 |
| 52 | O  | 16.23935 | 9.66356  | 12.06749 |
| 53 | H  | 12.29960 | 12.17876 | 8.70683  |
| 54 | H  | 12.29888 | 7.08273  | 8.72224  |
| 55 | H  | 1.73487  | 12.19323 | 8.54808  |
| 56 | H  | 1.73643  | 7.06660  | 8.56953  |
| 57 | H  | 9.55853  | 14.90797 | 8.58377  |
| 58 | H  | 4.46124  | 14.90882 | 8.63085  |
| 59 | H  | 9.55862  | 4.35277  | 8.59066  |
| 60 | H  | 4.46150  | 4.35210  | 8.64172  |
| 61 | H  | 16.73308 | 9.67414  | 12.92453 |
| 62 | Zn | 16.19079 | 9.63071  | 9.17358  |
| 63 | Zn | 7.01126  | 0.46410  | 8.63265  |

CO@CoPc-**Zn-O**

|    | ATOM | X        | Y        | Z       |
|----|------|----------|----------|---------|
| 1  | C    | 5.86221  | 7.16269  | 8.90176 |
| 2  | C    | 6.26267  | 5.77674  | 8.89600 |
| 3  | C    | 7.68559  | 5.77635  | 8.89177 |
| 4  | C    | 8.08671  | 7.16277  | 8.89671 |
| 5  | C    | 9.70914  | 8.78312  | 8.92299 |
| 6  | C    | 11.09600 | 9.18277  | 8.96751 |
| 7  | C    | 11.09595 | 10.60630 | 8.97521 |
| 8  | C    | 9.70890  | 11.00626 | 8.93050 |
| 9  | C    | 8.08624  | 12.62674 | 8.90209 |
| 10 | C    | 7.68523  | 14.01308 | 8.89512 |
| 11 | C    | 6.26235  | 14.01270 | 8.89484 |
| 12 | C    | 5.86210  | 12.62674 | 8.90129 |
| 13 | C    | 4.24007  | 11.00597 | 8.92564 |
| 14 | C    | 2.85348  | 10.60554 | 8.96170 |
| 15 | C    | 2.85371  | 9.18306  | 8.95885 |
| 16 | C    | 4.24010  | 8.78309  | 8.92412 |
| 17 | C    | 5.51416  | 15.17680 | 8.89647 |
| 18 | C    | 6.22420  | 16.40302 | 8.89922 |
| 19 | C    | 7.71984  | 16.40364 | 8.89977 |
| 20 | C    | 8.43194  | 15.17800 | 8.89725 |
| 21 | C    | 1.69015  | 8.43608  | 9.00924 |
| 22 | C    | 0.46368  | 9.14439  | 9.09744 |
| 23 | C    | 0.46324  | 10.64157 | 9.10593 |
| 24 | C    | 1.68923  | 11.35115 | 9.01869 |
| 25 | C    | 8.43226  | 4.61133  | 8.89183 |

|    |    |          |          |          |
|----|----|----------|----------|----------|
| 26 | C  | 7.72017  | 3.38539  | 8.89711  |
| 27 | C  | 6.22441  | 3.38609  | 8.90113  |
| 28 | C  | 5.51449  | 4.61260  | 8.90052  |
| 29 | C  | 12.25760 | 11.35322 | 9.04486  |
| 30 | C  | 13.48395 | 10.64310 | 9.13748  |
| 31 | C  | 13.48412 | 9.14327  | 9.12216  |
| 32 | C  | 12.25742 | 8.43454  | 9.02411  |
| 33 | C  | 16.26289 | 9.79932  | 11.74881 |
| 34 | N  | 6.97449  | 8.00731  | 8.89967  |
| 35 | N  | 4.59110  | 7.51234  | 8.91515  |
| 36 | N  | 9.35778  | 7.51232  | 8.90869  |
| 37 | N  | 8.86698  | 9.89460  | 8.91025  |
| 38 | N  | 9.35717  | 12.27694 | 8.91919  |
| 39 | N  | 6.97422  | 11.78230 | 8.90149  |
| 40 | N  | 4.59115  | 12.27663 | 8.91533  |
| 41 | N  | 5.08463  | 9.89452  | 8.91126  |
| 42 | Co | 6.97309  | 9.89471  | 8.90166  |
| 43 | O  | 14.62730 | 8.55188  | 9.21019  |
| 44 | O  | 14.62649 | 11.23306 | 9.24450  |
| 45 | O  | 17.65093 | 11.23387 | 9.20549  |
| 46 | O  | 17.65135 | 8.55065  | 9.18447  |
| 47 | O  | 5.63445  | 2.23437  | 8.90620  |
| 48 | O  | 8.30821  | 2.23281  | 8.89989  |
| 49 | O  | 5.63458  | 17.55498 | 8.90278  |
| 50 | O  | 8.30775  | 17.55635 | 8.90389  |
| 51 | O  | 16.42532 | 9.69058  | 12.86883 |
| 52 | H  | 12.25314 | 12.44330 | 9.05516  |
| 53 | H  | 12.25248 | 7.34428  | 9.01894  |
| 54 | H  | 1.69374  | 12.44138 | 9.02478  |
| 55 | H  | 1.69547  | 7.34572  | 9.00787  |
| 56 | H  | 9.52210  | 15.17516 | 8.89931  |
| 57 | H  | 4.42412  | 15.17182 | 8.89806  |
| 58 | H  | 9.52254  | 4.61422  | 8.89016  |
| 59 | H  | 4.42438  | 4.61768  | 8.90550  |
| 60 | Zn | 16.14416 | 9.89174  | 9.50881  |
| 61 | Zn | 6.96990  | 0.72868  | 8.90574  |

CuPc-Zn-O

|   | ATOM | X        | Y       | Z       |
|---|------|----------|---------|---------|
| 1 | C    | 5.72196  | 7.09561 | 7.28797 |
| 2 | C    | 6.12676  | 5.70010 | 7.29100 |
| 3 | C    | 7.55288  | 5.69888 | 7.28672 |
| 4 | C    | 7.95966  | 7.09409 | 7.28498 |
| 5 | C    | 9.60824  | 8.74056 | 7.28552 |
| 6 | C    | 11.00393 | 9.14657 | 7.28613 |

|    |   |          |          |         |
|----|---|----------|----------|---------|
| 7  | C | 11.00312 | 10.57269 | 7.28760 |
| 8  | C | 9.60794  | 10.97776 | 7.28554 |
| 9  | C | 7.96144  | 12.62567 | 7.27880 |
| 10 | C | 7.55684  | 14.02120 | 7.27542 |
| 11 | C | 6.13085  | 14.02219 | 7.27944 |
| 12 | C | 5.72428  | 12.62708 | 7.28150 |
| 13 | C | 4.07644  | 10.98074 | 7.28323 |
| 14 | C | 2.68098  | 10.57610 | 7.28110 |
| 15 | C | 2.67994  | 9.15015  | 7.27972 |
| 16 | C | 4.07511  | 8.74358  | 7.28340 |
| 17 | C | 5.38919  | 15.18937 | 7.28304 |
| 18 | C | 6.10082  | 16.41749 | 7.28366 |
| 19 | C | 7.59117  | 16.41632 | 7.27626 |
| 20 | C | 8.30058  | 15.18703 | 7.27162 |
| 21 | C | 1.51251  | 8.40893  | 7.27560 |
| 22 | C | 0.28431  | 9.12079  | 7.27509 |
| 23 | C | 0.28557  | 10.61110 | 7.27838 |
| 24 | C | 1.51535  | 11.32013 | 7.28041 |
| 25 | C | 8.29414  | 4.53133  | 7.28502 |
| 26 | C | 7.58235  | 3.30322  | 7.28941 |
| 27 | C | 6.09205  | 3.30486  | 7.29734 |
| 28 | C | 5.38296  | 4.53429  | 7.29718 |
| 29 | C | 12.16830 | 11.31733 | 7.28877 |
| 30 | C | 13.39806 | 10.60847 | 7.28644 |
| 31 | C | 13.39967 | 9.11814  | 7.28309 |
| 32 | C | 12.17157 | 8.40552  | 7.28387 |
| 33 | N | 6.84127  | 7.90316  | 7.28559 |
| 34 | N | 4.44943  | 7.47074  | 7.28616 |
| 35 | N | 9.23266  | 7.46803  | 7.28450 |
| 36 | N | 8.79944  | 9.85921  | 7.28574 |
| 37 | N | 9.23375  | 12.25057 | 7.28154 |
| 38 | N | 6.84237  | 11.81791 | 7.28156 |
| 39 | N | 4.45151  | 12.25338 | 7.28279 |
| 40 | N | 4.88441  | 9.86173  | 7.28481 |
| 41 | O | 14.54997 | 8.52240  | 7.27943 |
| 42 | O | 14.54686 | 11.20743 | 7.28641 |
| 43 | O | 17.56810 | 11.20997 | 7.27960 |
| 44 | O | 17.56581 | 8.52398  | 7.27279 |
| 45 | O | 5.49303  | 2.15578  | 7.30343 |
| 46 | O | 8.17858  | 2.15275  | 7.28704 |
| 47 | O | 5.50427  | 17.56777 | 7.29131 |
| 48 | O | 8.18973  | 17.56559 | 7.27609 |
| 49 | H | 12.16598 | 12.40764 | 7.29091 |
| 50 | H | 12.17366 | 7.31523  | 7.28177 |

|    |    |          |          |         |
|----|----|----------|----------|---------|
| 51 | H  | 1.51718  | 12.41032 | 7.28214 |
| 52 | H  | 1.51104  | 7.31878  | 7.27311 |
| 53 | H  | 9.39080  | 15.18525 | 7.26654 |
| 54 | H  | 4.29899  | 15.18967 | 7.28736 |
| 55 | H  | 9.38435  | 4.53066  | 7.27993 |
| 56 | H  | 4.29276  | 4.53622  | 7.30197 |
| 57 | Cu | 6.84189  | 9.86042  | 7.28518 |
| 58 | Zn | 6.83304  | 0.64544  | 7.29124 |
| 59 | Zn | 16.05763 | 9.86772  | 7.28091 |

CO<sub>2</sub>@CuPc-Zn-O

|    | ATOM | X        | Y        | Z       |
|----|------|----------|----------|---------|
| 1  | C    | 5.69662  | 7.12546  | 2.85278 |
| 2  | C    | 6.10087  | 5.73050  | 2.89005 |
| 3  | C    | 7.52658  | 5.72882  | 2.89892 |
| 4  | C    | 7.93394  | 7.12326  | 2.86572 |
| 5  | C    | 9.58254  | 8.76956  | 2.86920 |
| 6  | C    | 10.97898 | 9.17475  | 2.90180 |
| 7  | C    | 10.97924 | 10.60325 | 2.89787 |
| 8  | C    | 9.58332  | 11.00930 | 2.86399 |
| 9  | C    | 7.93633  | 12.65694 | 2.86342 |
| 10 | C    | 7.53053  | 14.05159 | 2.89917 |
| 11 | C    | 6.10473  | 14.05141 | 2.90172 |
| 12 | C    | 5.69898  | 12.65665 | 2.86615 |
| 13 | C    | 4.04977  | 11.01013 | 2.86020 |
| 14 | C    | 2.65350  | 10.60405 | 2.89223 |
| 15 | C    | 2.65309  | 9.17978  | 2.88526 |
| 16 | C    | 4.04878  | 8.77304  | 2.85002 |
| 17 | C    | 5.36215  | 15.21797 | 2.94502 |
| 18 | C    | 6.07317  | 16.44609 | 2.98954 |
| 19 | C    | 7.56317  | 16.44588 | 2.98605 |
| 20 | C    | 8.27365  | 15.21762 | 2.93933 |
| 21 | C    | 1.48546  | 8.43737  | 2.92293 |
| 22 | C    | 0.25815  | 9.14801  | 2.97239 |
| 23 | C    | 0.25830  | 10.63492 | 2.97918 |
| 24 | C    | 1.48581  | 11.34613 | 2.93677 |
| 25 | C    | 8.26740  | 4.56146  | 2.94590 |
| 26 | C    | 7.55442  | 3.33428  | 2.98840 |
| 27 | C    | 6.06439  | 3.33629  | 2.97950 |
| 28 | C    | 5.35596  | 4.56531  | 2.92802 |
| 29 | C    | 12.14215 | 11.34799 | 2.93502 |
| 30 | C    | 13.37185 | 10.63645 | 2.97995 |
| 31 | C    | 13.37184 | 9.14268  | 2.98416 |
| 32 | C    | 12.14211 | 8.43057  | 2.94308 |

|    |    |          |          |         |
|----|----|----------|----------|---------|
| 33 | C  | 6.71815  | 9.79408  | 6.13828 |
| 34 | N  | 6.81590  | 7.93308  | 2.83573 |
| 35 | N  | 4.42358  | 7.50080  | 2.85296 |
| 36 | N  | 9.20664  | 7.49764  | 2.87636 |
| 37 | N  | 8.77617  | 9.88975  | 2.84423 |
| 38 | N  | 9.20880  | 12.28160 | 2.86759 |
| 39 | N  | 6.81759  | 11.84818 | 2.84083 |
| 40 | N  | 4.42572  | 12.28203 | 2.87133 |
| 41 | N  | 4.85896  | 9.89135  | 2.83162 |
| 42 | O  | 14.51992 | 8.55059  | 3.02679 |
| 43 | O  | 14.51978 | 11.22920 | 3.01927 |
| 44 | O  | 17.53747 | 11.23230 | 3.02586 |
| 45 | O  | 17.53728 | 8.55028  | 3.01425 |
| 46 | O  | 5.46514  | 2.18770  | 3.02132 |
| 47 | O  | 8.14964  | 2.18412  | 3.03694 |
| 48 | O  | 5.47633  | 17.59569 | 3.03487 |
| 49 | O  | 8.16078  | 17.59511 | 3.02784 |
| 50 | O  | 7.49397  | 8.91060  | 6.13592 |
| 51 | O  | 5.94298  | 10.67785 | 6.12060 |
| 52 | H  | 12.13984 | 12.43819 | 2.93365 |
| 53 | H  | 12.14045 | 7.34036  | 2.94773 |
| 54 | H  | 1.48648  | 12.43655 | 2.94334 |
| 55 | H  | 1.48664  | 7.34698  | 2.91913 |
| 56 | H  | 9.36407  | 15.21600 | 2.93860 |
| 57 | H  | 4.27177  | 15.21689 | 2.94846 |
| 58 | H  | 9.35781  | 4.56088  | 2.95422 |
| 59 | H  | 4.26562  | 4.56870  | 2.92267 |
| 60 | Cu | 6.81696  | 9.89075  | 2.81340 |
| 61 | Zn | 6.80428  | 0.67582  | 3.05939 |
| 62 | Zn | 16.03829 | 9.89085  | 3.04826 |

COOH@*CuPc*-Zn-O

|    | ATOM | X        | Y        | Z       |
|----|------|----------|----------|---------|
| 1  | C    | 5.68678  | 7.12643  | 3.01724 |
| 2  | C    | 6.09492  | 5.73384  | 3.04847 |
| 3  | C    | 7.52372  | 5.73335  | 3.05482 |
| 4  | C    | 7.93357  | 7.12609  | 3.02920 |
| 5  | C    | 9.58993  | 8.77072  | 2.97457 |
| 6  | C    | 10.98454 | 9.17407  | 3.01062 |
| 7  | C    | 10.98450 | 10.59960 | 3.01381 |
| 8  | C    | 9.59020  | 11.00343 | 2.98121 |
| 9  | C    | 7.93518  | 12.64798 | 3.04765 |
| 10 | C    | 7.52770  | 14.04217 | 3.06003 |
| 11 | C    | 6.09902  | 14.04378 | 3.05511 |
| 12 | C    | 5.68937  | 12.65039 | 3.03757 |

|    |   |          |          |         |
|----|---|----------|----------|---------|
| 13 | C | 4.03391  | 11.00604 | 2.95402 |
| 14 | C | 2.64193  | 10.60233 | 2.99795 |
| 15 | C | 2.64164  | 9.17790  | 2.99328 |
| 16 | C | 4.03290  | 8.77377  | 2.94534 |
| 17 | C | 5.35762  | 15.21031 | 3.02304 |
| 18 | C | 6.06996  | 16.43897 | 3.00775 |
| 19 | C | 7.56439  | 16.43689 | 3.01057 |
| 20 | C | 8.27304  | 15.20602 | 3.03041 |
| 21 | C | 1.47202  | 8.43658  | 2.99851 |
| 22 | C | 0.24656  | 9.14710  | 3.01191 |
| 23 | C | 0.24679  | 10.63340 | 3.01548 |
| 24 | C | 1.47267  | 11.34391 | 3.00669 |
| 25 | C | 8.26657  | 4.56733  | 3.03181 |
| 26 | C | 7.55567  | 3.33802  | 3.01492 |
| 27 | C | 6.06127  | 3.33864  | 3.01049 |
| 28 | C | 5.35152  | 4.56806  | 3.02160 |
| 29 | C | 12.15113 | 11.34220 | 3.01638 |
| 30 | C | 13.37837 | 10.63143 | 3.02087 |
| 31 | C | 13.37882 | 9.14415  | 3.01854 |
| 32 | C | 12.15198 | 8.43247  | 3.01083 |
| 33 | C | 6.76153  | 9.80517  | 5.27146 |
| 34 | N | 6.81118  | 7.93197  | 2.98264 |
| 35 | N | 4.41563  | 7.50273  | 3.00703 |
| 36 | N | 9.20634  | 7.49988  | 3.02917 |
| 37 | N | 8.78692  | 9.88770  | 2.89728 |
| 38 | N | 9.20783  | 12.27438 | 3.04070 |
| 39 | N | 6.81228  | 11.84318 | 3.02060 |
| 40 | N | 4.41757  | 12.27674 | 3.02181 |
| 41 | N | 4.83862  | 9.89039  | 2.85174 |
| 42 | O | 14.53020 | 8.54550  | 3.02845 |
| 43 | O | 14.52915 | 11.23129 | 3.03199 |
| 44 | O | 17.52600 | 11.23372 | 3.03215 |
| 45 | O | 17.52546 | 8.54698  | 3.02639 |
| 46 | O | 5.46631  | 2.19017  | 3.00074 |
| 47 | O | 8.14959  | 2.18923  | 3.00826 |
| 48 | O | 5.47744  | 17.58830 | 2.99562 |
| 49 | O | 8.16057  | 17.58426 | 2.99986 |
| 50 | O | 7.80757  | 9.79331  | 5.87602 |
| 51 | O | 5.52200  | 9.76696  | 5.71760 |
| 52 | H | 12.14958 | 12.43260 | 3.01676 |
| 53 | H | 12.15157 | 7.34209  | 3.00738 |
| 54 | H | 1.47346  | 12.43442 | 3.00849 |
| 55 | H | 1.47271  | 7.34608  | 2.99451 |
| 56 | H | 9.36326  | 15.20243 | 3.02688 |

|    |    |          |          |         |
|----|----|----------|----------|---------|
| 57 | H  | 4.26744  | 15.21033 | 3.01452 |
| 58 | H  | 9.35681  | 4.56866  | 3.03040 |
| 59 | H  | 4.26135  | 4.57032  | 3.01304 |
| 60 | H  | 5.50309  | 9.72037  | 6.70867 |
| 61 | Cu | 6.80747  | 9.88558  | 3.16779 |
| 62 | Zn | 6.80646  | 0.67368  | 2.99886 |
| 63 | Zn | 16.03041 | 9.88992  | 3.04117 |

CO@*CuPc*-Zn-O

|    | ATOM | X        | Y        | Z       |
|----|------|----------|----------|---------|
| 1  | C    | 5.70339  | 7.12391  | 2.97573 |
| 2  | C    | 6.10790  | 5.72711  | 2.98895 |
| 3  | C    | 7.53490  | 5.72633  | 2.97945 |
| 4  | C    | 7.94057  | 7.12288  | 2.95926 |
| 5  | C    | 9.58994  | 8.76945  | 2.95495 |
| 6  | C    | 10.98649 | 9.17496  | 2.96277 |
| 7  | C    | 10.98661 | 10.59997 | 2.96903 |
| 8  | C    | 9.59057  | 11.00598 | 2.96683 |
| 9  | C    | 7.94271  | 12.65342 | 2.99184 |
| 10 | C    | 7.53843  | 14.05010 | 3.00170 |
| 11 | C    | 6.11156  | 14.05131 | 3.01293 |
| 12 | C    | 5.70518  | 12.65481 | 3.01040 |
| 13 | C    | 4.05590  | 11.00849 | 3.01236 |
| 14 | C    | 2.65966  | 10.60269 | 3.01321 |
| 15 | C    | 2.65948  | 9.17786  | 3.00529 |
| 16 | C    | 4.05532  | 8.77151  | 2.99839 |
| 17 | C    | 5.36957  | 15.21701 | 3.02376 |
| 18 | C    | 6.08215  | 16.44601 | 3.02344 |
| 19 | C    | 7.57383  | 16.44432 | 3.01230 |
| 20 | C    | 8.28331  | 15.21393 | 3.00161 |
| 21 | C    | 1.49182  | 8.43580  | 3.00286 |
| 22 | C    | 0.26349  | 9.14657  | 3.00581 |
| 23 | C    | 0.26346  | 10.63371 | 3.01362 |
| 24 | C    | 1.49190  | 11.34467 | 3.01842 |
| 25 | C    | 8.27756  | 4.56116  | 2.98491 |
| 26 | C    | 7.56560  | 3.33193  | 2.99927 |
| 27 | C    | 6.07380  | 3.33299  | 3.00770 |
| 28 | C    | 5.36360  | 4.56313  | 3.00294 |
| 29 | C    | 12.15353 | 11.34246 | 2.97874 |
| 30 | C    | 13.38204 | 10.63172 | 2.98198 |
| 31 | C    | 13.38227 | 9.14428  | 2.97616 |
| 32 | C    | 12.15381 | 8.43300  | 2.96677 |
| 33 | C    | 6.84778  | 9.83792  | 6.07054 |
| 34 | N    | 6.82216  | 7.92899  | 2.94745 |

|    |    |          |          |         |
|----|----|----------|----------|---------|
| 35 | N  | 4.43068  | 7.49902  | 2.99117 |
| 36 | N  | 9.21367  | 7.49711  | 2.95779 |
| 37 | N  | 8.78157  | 9.88805  | 2.95378 |
| 38 | N  | 9.21534  | 12.27854 | 2.98071 |
| 39 | N  | 6.82346  | 11.84792 | 2.99844 |
| 40 | N  | 4.43211  | 12.28089 | 3.01754 |
| 41 | N  | 4.86503  | 9.88982  | 3.00352 |
| 42 | O  | 14.53395 | 8.54663  | 2.98054 |
| 43 | O  | 14.53345 | 11.22998 | 2.99066 |
| 44 | O  | 17.54311 | 11.23176 | 3.01416 |
| 45 | O  | 17.54326 | 8.54820  | 3.00017 |
| 46 | O  | 5.47542  | 2.18528  | 3.02064 |
| 47 | O  | 8.16222  | 2.18330  | 3.00655 |
| 48 | O  | 5.48622  | 17.59506 | 3.03235 |
| 49 | O  | 8.17290  | 17.59189 | 3.01245 |
| 50 | O  | 6.32179  | 10.24126 | 7.00157 |
| 51 | H  | 12.15195 | 12.43294 | 2.98400 |
| 52 | H  | 12.15295 | 7.34251  | 2.96357 |
| 53 | H  | 1.49258  | 12.43520 | 3.02397 |
| 54 | H  | 1.49271  | 7.34529  | 2.99731 |
| 55 | H  | 9.37353  | 15.21144 | 2.99389 |
| 56 | H  | 4.27936  | 15.21737 | 3.03227 |
| 57 | H  | 9.36780  | 4.56131  | 2.97956 |
| 58 | H  | 4.27339  | 4.56508  | 3.01072 |
| 59 | Cu | 6.82360  | 9.88819  | 2.99109 |
| 60 | Zn | 6.81713  | 0.67384  | 3.02065 |
| 61 | Zn | 16.03884 | 9.88938  | 2.99691 |

CO<sub>2</sub>@CuPc-**Zn-O**

|    | ATOM | X        | Y        | Z       |
|----|------|----------|----------|---------|
| 1  | C    | 5.69662  | 7.12546  | 2.85278 |
| 2  | C    | 6.10087  | 5.73050  | 2.89005 |
| 3  | C    | 7.52658  | 5.72882  | 2.89892 |
| 4  | C    | 7.93394  | 7.12326  | 2.86572 |
| 5  | C    | 9.58254  | 8.76956  | 2.86920 |
| 6  | C    | 10.97898 | 9.17475  | 2.90180 |
| 7  | C    | 10.97924 | 10.60325 | 2.89787 |
| 8  | C    | 9.58332  | 11.00930 | 2.86399 |
| 9  | C    | 7.93633  | 12.65694 | 2.86342 |
| 10 | C    | 7.53053  | 14.05159 | 2.89917 |
| 11 | C    | 6.10473  | 14.05141 | 2.90172 |
| 12 | C    | 5.69898  | 12.65665 | 2.86615 |
| 13 | C    | 4.04977  | 11.01013 | 2.86020 |
| 14 | C    | 2.65350  | 10.60405 | 2.89223 |

|    |   |          |          |         |
|----|---|----------|----------|---------|
| 15 | C | 2.65309  | 9.17978  | 2.88526 |
| 16 | C | 4.04878  | 8.77304  | 2.85002 |
| 17 | C | 5.36215  | 15.21797 | 2.94502 |
| 18 | C | 6.07317  | 16.44609 | 2.98954 |
| 19 | C | 7.56317  | 16.44588 | 2.98605 |
| 20 | C | 8.27365  | 15.21762 | 2.93933 |
| 21 | C | 1.48546  | 8.43737  | 2.92293 |
| 22 | C | 0.25815  | 9.14801  | 2.97239 |
| 23 | C | 0.25830  | 10.63492 | 2.97918 |
| 24 | C | 1.48581  | 11.34613 | 2.93677 |
| 25 | C | 8.26740  | 4.56146  | 2.94590 |
| 26 | C | 7.55442  | 3.33428  | 2.98840 |
| 27 | C | 6.06439  | 3.33629  | 2.97950 |
| 28 | C | 5.35596  | 4.56531  | 2.92802 |
| 29 | C | 12.14215 | 11.34799 | 2.93502 |
| 30 | C | 13.37185 | 10.63645 | 2.97995 |
| 31 | C | 13.37184 | 9.14268  | 2.98416 |
| 32 | C | 12.14211 | 8.43057  | 2.94308 |
| 33 | C | 6.71815  | 9.79408  | 6.13828 |
| 34 | N | 6.81590  | 7.93308  | 2.83573 |
| 35 | N | 4.42358  | 7.50080  | 2.85296 |
| 36 | N | 9.20664  | 7.49764  | 2.87636 |
| 37 | N | 8.77617  | 9.88975  | 2.84423 |
| 38 | N | 9.20880  | 12.28160 | 2.86759 |
| 39 | N | 6.81759  | 11.84818 | 2.84083 |
| 40 | N | 4.42572  | 12.28203 | 2.87133 |
| 41 | N | 4.85896  | 9.89135  | 2.83162 |
| 42 | O | 14.51992 | 8.55059  | 3.02679 |
| 43 | O | 14.51978 | 11.22920 | 3.01927 |
| 44 | O | 17.53747 | 11.23230 | 3.02586 |
| 45 | O | 17.53728 | 8.55028  | 3.01425 |
| 46 | O | 5.46514  | 2.18770  | 3.02132 |
| 47 | O | 8.14964  | 2.18412  | 3.03694 |
| 48 | O | 5.47633  | 17.59569 | 3.03487 |
| 49 | O | 8.16078  | 17.59511 | 3.02784 |
| 50 | O | 7.49397  | 8.91060  | 6.13592 |
| 51 | O | 5.94298  | 10.67785 | 6.12060 |
| 52 | H | 12.13984 | 12.43819 | 2.93365 |
| 53 | H | 12.14045 | 7.34036  | 2.94773 |
| 54 | H | 1.48648  | 12.43655 | 2.94334 |
| 55 | H | 1.48664  | 7.34698  | 2.91913 |
| 56 | H | 9.36407  | 15.21600 | 2.93860 |
| 57 | H | 4.27177  | 15.21689 | 2.94846 |
| 58 | H | 9.35781  | 4.56088  | 2.95422 |

|    |    |          |         |         |
|----|----|----------|---------|---------|
| 59 | H  | 4.26562  | 4.56870 | 2.92267 |
| 60 | Cu | 6.81696  | 9.89075 | 2.81340 |
| 61 | Zn | 6.80428  | 0.67582 | 3.05939 |
| 62 | Zn | 16.03829 | 9.89085 | 3.0482  |

COOH@CuPc-**Zn-O**

| ATOM |   | X        | Y        | Z       |
|------|---|----------|----------|---------|
| 1    | C | 5.67452  | 7.12739  | 2.94991 |
| 2    | C | 6.08008  | 5.73195  | 2.97613 |
| 3    | C | 7.50743  | 5.73177  | 2.96662 |
| 4    | C | 7.91277  | 7.12700  | 2.93582 |
| 5    | C | 9.56447  | 8.77013  | 2.91535 |
| 6    | C | 10.96617 | 9.17297  | 2.91756 |
| 7    | C | 10.96629 | 10.60562 | 2.91473 |
| 8    | C | 9.56505  | 11.00901 | 2.91195 |
| 9    | C | 7.91473  | 12.65349 | 2.93092 |
| 10   | C | 7.51124  | 14.04903 | 2.96205 |
| 11   | C | 6.08389  | 14.05093 | 2.97224 |
| 12   | C | 5.67645  | 12.65580 | 2.94584 |
| 13   | C | 4.02536  | 11.01157 | 2.94217 |
| 14   | C | 2.62567  | 10.60900 | 2.95061 |
| 15   | C | 2.62545  | 9.17613  | 2.95231 |
| 16   | C | 4.02481  | 8.77299  | 2.94447 |
| 17   | C | 5.34282  | 15.21708 | 3.00789 |
| 18   | C | 6.05625  | 16.44552 | 3.03408 |
| 19   | C | 7.54836  | 16.44314 | 3.02338 |
| 20   | C | 8.25706  | 15.21241 | 2.98735 |
| 21   | C | 1.46581  | 8.43099  | 2.97180 |
| 22   | C | 0.22827  | 9.14202  | 2.97484 |
| 23   | C | 0.22832  | 10.64306 | 2.97311 |
| 24   | C | 1.46597  | 11.35414 | 2.96820 |
| 25   | C | 8.25100  | 4.56688  | 2.99118 |
| 26   | C | 7.53985  | 3.33732  | 3.02571 |
| 27   | C | 6.04776  | 3.33766  | 3.03557 |
| 28   | C | 5.33674  | 4.56723  | 3.01024 |
| 29   | C | 12.12415 | 11.35172 | 2.95296 |
| 30   | C | 13.35889 | 10.63886 | 2.98599 |
| 31   | C | 13.35902 | 9.14058  | 2.98949 |
| 32   | C | 12.12421 | 8.42728  | 2.95948 |
| 33   | C | 16.22619 | 9.89423  | 5.57176 |
| 34   | N | 6.79485  | 7.93547  | 2.92727 |
| 35   | N | 4.40162  | 7.50156  | 2.95198 |
| 36   | N | 9.18780  | 7.49994  | 2.92348 |
| 37   | N | 8.76066  | 9.88982  | 2.92338 |

|    |    |          |          |         |
|----|----|----------|----------|---------|
| 38 | N  | 9.18934  | 12.27942 | 2.91787 |
| 39 | N  | 6.79589  | 11.84641 | 2.92318 |
| 40 | N  | 4.40315  | 12.28279 | 2.94793 |
| 41 | N  | 4.82998  | 9.89204  | 2.93814 |
| 42 | O  | 14.50323 | 8.56061  | 3.05269 |
| 43 | O  | 14.50295 | 11.21965 | 3.04641 |
| 44 | O  | 17.51774 | 11.22779 | 2.98399 |
| 45 | O  | 17.51771 | 8.55720  | 2.98687 |
| 46 | O  | 5.45135  | 2.18981  | 3.06769 |
| 47 | O  | 8.13604  | 2.18914  | 3.04961 |
| 48 | O  | 5.46231  | 17.59450 | 3.06778 |
| 49 | O  | 8.14686  | 17.59017 | 3.04816 |
| 50 | O  | 17.31819 | 9.89635  | 6.12512 |
| 51 | O  | 15.05195 | 9.89226  | 6.23617 |
| 52 | H  | 12.12086 | 12.44185 | 2.96158 |
| 53 | H  | 12.12127 | 7.33721  | 2.97323 |
| 54 | H  | 1.46870  | 12.44440 | 2.97150 |
| 55 | H  | 1.46871  | 7.34073  | 2.97792 |
| 56 | H  | 9.34736  | 15.20868 | 2.98182 |
| 57 | H  | 4.25257  | 15.21790 | 3.01754 |
| 58 | H  | 9.34132  | 4.56824  | 2.98597 |
| 59 | H  | 4.24649  | 4.56851  | 3.01903 |
| 60 | H  | 15.21178 | 9.89269  | 7.21187 |
| 61 | Cu | 6.79495  | 9.89095  | 2.91877 |
| 62 | Zn | 6.79255  | 0.67607  | 3.07927 |
| 63 | Zn | 16.01346 | 9.89275  | 3.52904 |

CO@CuPc-**Zn-O**

|    | ATOM | X        | Y        | Z       |
|----|------|----------|----------|---------|
| 1  | C    | 5.70068  | 7.12342  | 2.92348 |
| 2  | C    | 6.10570  | 5.73012  | 2.95193 |
| 3  | C    | 7.52871  | 5.72898  | 2.95666 |
| 4  | C    | 7.93610  | 7.12218  | 2.93133 |
| 5  | C    | 9.58553  | 8.76885  | 2.93204 |
| 6  | C    | 10.98530 | 9.17373  | 2.96299 |
| 7  | C    | 10.98560 | 10.60293 | 2.96421 |
| 8  | C    | 9.58632  | 11.00852 | 2.93357 |
| 9  | C    | 7.93817  | 12.65653 | 2.93427 |
| 10 | C    | 7.53259  | 14.04977 | 2.95871 |
| 11 | C    | 6.10957  | 14.05049 | 2.95467 |
| 12 | C    | 5.70272  | 12.65720 | 2.92753 |
| 13 | C    | 4.05328  | 11.01076 | 2.91741 |
| 14 | C    | 2.65356  | 10.60584 | 2.94559 |
| 15 | C    | 2.65337  | 9.17671  | 2.94295 |

|    |    |          |          |         |
|----|----|----------|----------|---------|
| 16 | C  | 4.05264  | 8.77134  | 2.91439 |
| 17 | C  | 5.36917  | 15.22161 | 2.98389 |
| 18 | C  | 6.07994  | 16.44841 | 3.01933 |
| 19 | C  | 7.56521  | 16.44758 | 3.02254 |
| 20 | C  | 8.27434  | 15.22019 | 2.99146 |
| 21 | C  | 1.49264  | 8.43325  | 2.99739 |
| 22 | C  | 0.26181  | 9.14343  | 3.08012 |
| 23 | C  | 0.26192  | 10.63809 | 3.08506 |
| 24 | C  | 1.49277  | 11.34892 | 3.00418 |
| 25 | C  | 8.26828  | 4.55742  | 2.99131 |
| 26 | C  | 7.55669  | 3.33097  | 3.02299 |
| 27 | C  | 6.07143  | 3.33258  | 3.01944 |
| 28 | C  | 5.36313  | 4.56020  | 2.98261 |
| 29 | C  | 12.14647 | 11.34616 | 3.01994 |
| 30 | C  | 13.37738 | 10.63568 | 3.09889 |
| 31 | C  | 13.37737 | 9.14084  | 3.09635 |
| 32 | C  | 12.14613 | 8.43044  | 3.01680 |
| 33 | C  | 16.04998 | 9.86732  | 5.69163 |
| 34 | N  | 6.81907  | 7.93398  | 2.91180 |
| 35 | N  | 4.42660  | 7.50008  | 2.92040 |
| 36 | N  | 9.21056  | 7.49771  | 2.93631 |
| 37 | N  | 8.78135  | 9.88884  | 2.91697 |
| 38 | N  | 9.21227  | 12.27982 | 2.93886 |
| 39 | N  | 6.82006  | 11.84570 | 2.91559 |
| 40 | N  | 4.42821  | 12.28184 | 2.92520 |
| 41 | N  | 4.85768  | 9.89092  | 2.90112 |
| 42 | O  | 14.51882 | 8.54431  | 3.18368 |
| 43 | O  | 14.51880 | 11.23210 | 3.18976 |
| 44 | O  | 17.55253 | 11.23453 | 3.18132 |
| 45 | O  | 17.55219 | 8.54637  | 3.17027 |
| 46 | O  | 5.47003  | 2.18069  | 3.05121 |
| 47 | O  | 8.15525  | 2.17791  | 3.05619 |
| 48 | O  | 5.48066  | 17.60112 | 3.05047 |
| 49 | O  | 8.16577  | 17.59987 | 3.05526 |
| 50 | O  | 16.05948 | 9.84801  | 6.82743 |
| 51 | H  | 12.14377 | 12.43622 | 3.02661 |
| 52 | H  | 12.14368 | 7.34037  | 3.02131 |
| 53 | H  | 1.49525  | 12.43907 | 3.01410 |
| 54 | H  | 1.49541  | 7.34309  | 3.00246 |
| 55 | H  | 9.36498  | 15.21900 | 2.99589 |
| 56 | H  | 4.27853  | 15.22200 | 2.98263 |
| 57 | H  | 9.35892  | 4.55621  | 2.99643 |
| 58 | H  | 4.27249  | 4.56205  | 2.98109 |
| 59 | Cu | 6.81958  | 9.88987  | 2.90276 |

|    |    |          |         |         |
|----|----|----------|---------|---------|
| 60 | Zn | 6.80980  | 0.67494 | 3.07407 |
| 61 | Zn | 16.03684 | 9.88916 | 3.50617 |

# ZnPc-Zn-O

|    | ATOM | X        | Y        | Z       |
|----|------|----------|----------|---------|
| 1  | C    | 5.69369  | 7.07884  | 3.01611 |
| 2  | C    | 6.10079  | 5.67967  | 3.02580 |
| 3  | C    | 7.53182  | 5.67820  | 3.02355 |
| 4  | C    | 7.94159  | 7.07680  | 3.01495 |
| 5  | C    | 9.61009  | 8.74292  | 3.01503 |
| 6  | C    | 11.00929 | 9.15145  | 3.01612 |
| 7  | C    | 11.00879 | 10.58243 | 3.01730 |
| 8  | C    | 9.61024  | 10.99064 | 3.01497 |
| 9  | C    | 7.94435  | 12.65912 | 3.01028 |
| 10 | C    | 7.53746  | 14.05826 | 3.01509 |
| 11 | C    | 6.10651  | 14.05985 | 3.01711 |
| 12 | C    | 5.69684  | 12.66124 | 3.01124 |
| 13 | C    | 4.02873  | 10.99504 | 3.01195 |
| 14 | C    | 2.62958  | 10.58765 | 3.01064 |
| 15 | C    | 2.62869  | 9.15665  | 3.00959 |
| 16 | C    | 4.02732  | 8.74729  | 3.01215 |
| 17 | C    | 5.36848  | 15.22877 | 3.02723 |
| 18 | C    | 6.08061  | 16.45708 | 3.03631 |
| 19 | C    | 7.57010  | 16.45506 | 3.03215 |
| 20 | C    | 8.27874  | 15.22503 | 3.02100 |
| 21 | C    | 1.46023  | 8.41794  | 3.00608 |
| 22 | C    | 0.23158  | 9.12926  | 3.00429 |
| 23 | C    | 0.23240  | 10.61878 | 3.00714 |
| 24 | C    | 1.46225  | 11.32822 | 3.01005 |
| 25 | C    | 8.27000  | 4.50936  | 3.03077 |
| 26 | C    | 7.55812  | 3.28087  | 3.04151 |
| 27 | C    | 6.06860  | 3.28266  | 3.04618 |
| 28 | C    | 5.35977  | 4.51275  | 3.03770 |
| 29 | C    | 12.17571 | 11.32343 | 3.01851 |
| 30 | C    | 13.40552 | 10.61454 | 3.01542 |
| 31 | C    | 13.40679 | 9.12500  | 3.01233 |
| 32 | C    | 12.17809 | 8.41313  | 3.01420 |
| 33 | N    | 6.81830  | 7.87191  | 3.00946 |
| 34 | N    | 4.42018  | 7.47331  | 3.01498 |
| 35 | N    | 9.21581  | 7.46933  | 3.01540 |
| 36 | N    | 8.81601  | 9.86696  | 3.01410 |
| 37 | N    | 9.21766  | 12.26460 | 3.01303 |
| 38 | N    | 6.81991  | 11.86597 | 3.00653 |
| 39 | N    | 4.42285  | 12.26862 | 3.01234 |
| 40 | N    | 4.82217  | 9.87067  | 3.01270 |

|    |    |          |          |         |
|----|----|----------|----------|---------|
| 41 | O  | 14.55686 | 8.52763  | 3.00737 |
| 42 | O  | 14.55429 | 11.21479 | 3.01393 |
| 43 | O  | 17.56899 | 11.21818 | 3.00677 |
| 44 | O  | 17.56750 | 8.53107  | 3.00073 |
| 45 | O  | 5.46837  | 2.13401  | 3.05743 |
| 46 | O  | 8.15541  | 2.13071  | 3.04767 |
| 47 | O  | 5.48354  | 17.60736 | 3.04892 |
| 48 | O  | 8.17078  | 17.60357 | 3.04027 |
| 49 | H  | 12.17379 | 12.41397 | 3.02061 |
| 50 | H  | 12.17945 | 7.32257  | 3.01263 |
| 51 | H  | 1.46344  | 12.41877 | 3.01189 |
| 52 | H  | 1.45953  | 7.32740  | 3.00450 |
| 53 | H  | 9.36928  | 15.22321 | 3.01859 |
| 54 | H  | 4.27792  | 15.23012 | 3.03000 |
| 55 | H  | 9.36055  | 4.50820  | 3.02828 |
| 56 | H  | 4.26923  | 4.51456  | 3.04093 |
| 57 | Zn | 6.81911  | 9.86869  | 3.00709 |
| 58 | Zn | 16.06192 | 9.87421  | 3.00426 |
| 59 | Zn | 6.80940  | 0.62549  | 3.05563 |

CO<sub>2</sub>@ZnPc-Zn-O

|    | ATOM | X        | Y        | Z       |
|----|------|----------|----------|---------|
| 1  | C    | 5.67727  | 7.10332  | 2.95458 |
| 2  | C    | 6.08419  | 5.70429  | 2.97563 |
| 3  | C    | 7.51504  | 5.70304  | 2.99270 |
| 4  | C    | 7.92468  | 7.10166  | 2.98157 |
| 5  | C    | 9.59302  | 8.76805  | 2.97230 |
| 6  | C    | 10.99204 | 9.17623  | 2.97662 |
| 7  | C    | 10.99228 | 10.60694 | 2.95368 |
| 8  | C    | 9.59377  | 11.01528 | 2.93659 |
| 9  | C    | 7.92769  | 12.68342 | 2.90165 |
| 10 | C    | 7.52060  | 14.08242 | 2.91619 |
| 11 | C    | 6.08955  | 14.08397 | 2.90112 |
| 12 | C    | 5.68022  | 12.68523 | 2.87742 |
| 13 | C    | 4.01183  | 11.01882 | 2.87937 |
| 14 | C    | 2.61270  | 10.61104 | 2.89929 |
| 15 | C    | 2.61268  | 9.18011  | 2.91946 |
| 16 | C    | 4.01117  | 8.77136  | 2.91191 |
| 17 | C    | 5.35184  | 15.25288 | 2.91735 |
| 18 | C    | 6.06409  | 16.48091 | 2.94917 |
| 19 | C    | 7.55345  | 16.47869 | 2.96442 |
| 20 | C    | 8.26199  | 15.24860 | 2.94785 |
| 21 | C    | 1.44551  | 8.44026  | 2.95085 |
| 22 | C    | 0.21635  | 9.15047  | 2.96292 |

|    |    |          |          |         |
|----|----|----------|----------|---------|
| 23 | C  | 0.21577  | 10.63939 | 2.94135 |
| 24 | C  | 1.44452  | 11.35013 | 2.90973 |
| 25 | C  | 8.25331  | 4.53430  | 3.01252 |
| 26 | C  | 7.54174  | 3.30573  | 3.01314 |
| 27 | C  | 6.05260  | 3.30724  | 2.99581 |
| 28 | C  | 5.34359  | 4.53693  | 2.97816 |
| 29 | C  | 12.16032 | 11.34642 | 2.95266 |
| 30 | C  | 13.38908 | 10.63602 | 2.97517 |
| 31 | C  | 13.38905 | 9.14726  | 2.99840 |
| 32 | C  | 12.15996 | 8.43678  | 2.99928 |
| 33 | C  | 7.15422  | 9.39211  | 6.54551 |
| 34 | N  | 6.80172  | 7.89671  | 2.96016 |
| 35 | N  | 4.40413  | 7.49765  | 2.93661 |
| 36 | N  | 9.19848  | 7.49469  | 2.98885 |
| 37 | N  | 8.79921  | 9.89183  | 2.94819 |
| 38 | N  | 9.20090  | 12.28895 | 2.92007 |
| 39 | N  | 6.80360  | 11.89062 | 2.87301 |
| 40 | N  | 4.40620  | 12.29243 | 2.87314 |
| 41 | N  | 4.80528  | 9.89446  | 2.88252 |
| 42 | O  | 14.53874 | 8.54912  | 3.01720 |
| 43 | O  | 14.53871 | 11.23477 | 2.97639 |
| 44 | O  | 17.55185 | 11.23746 | 2.95486 |
| 45 | O  | 17.55301 | 8.55182  | 2.99450 |
| 46 | O  | 5.45252  | 2.15834  | 2.99672 |
| 47 | O  | 8.13901  | 2.15557  | 3.02767 |
| 48 | O  | 5.46726  | 17.63095 | 2.96853 |
| 49 | O  | 8.15372  | 17.62682 | 2.99527 |
| 50 | O  | 7.65135  | 8.70364  | 7.35571 |
| 51 | O  | 6.65500  | 10.08336 | 5.73407 |
| 52 | H  | 12.16065 | 12.43662 | 2.93603 |
| 53 | H  | 12.16019 | 7.34651  | 3.01762 |
| 54 | H  | 1.44371  | 12.44044 | 2.89772 |
| 55 | H  | 1.44626  | 7.34994  | 2.96911 |
| 56 | H  | 9.35251  | 15.24672 | 2.96270 |
| 57 | H  | 4.26132  | 15.25498 | 2.90941 |
| 58 | H  | 9.34385  | 4.53267  | 3.02601 |
| 59 | H  | 4.25316  | 4.53762  | 2.96587 |
| 60 | Zn | 6.80199  | 9.89390  | 2.90859 |
| 61 | Zn | 16.04546 | 9.89309  | 2.99597 |
| 62 | Zn | 6.79286  | 0.65005  | 3.00587 |

COOH@**ZnPc**-Zn-O

|   | ATOM | X       | Y       | Z       |
|---|------|---------|---------|---------|
| 1 | C    | 5.64709 | 7.08628 | 3.06100 |

|    |   |          |          |         |
|----|---|----------|----------|---------|
| 2  | C | 6.04525  | 5.68473  | 2.97127 |
| 3  | C | 7.47925  | 5.68362  | 2.92532 |
| 4  | C | 7.88423  | 7.08439  | 2.99601 |
| 5  | C | 9.54773  | 8.74705  | 2.97741 |
| 6  | C | 10.95181 | 9.14821  | 2.93376 |
| 7  | C | 10.95116 | 10.58374 | 2.93086 |
| 8  | C | 9.54768  | 10.98437 | 2.97415 |
| 9  | C | 7.88699  | 12.64955 | 2.99397 |
| 10 | C | 7.48486  | 14.05097 | 2.92534 |
| 11 | C | 6.05102  | 14.05312 | 2.97716 |
| 12 | C | 5.65029  | 12.65205 | 3.06534 |
| 13 | C | 3.98827  | 10.98899 | 3.11535 |
| 14 | C | 2.58525  | 10.58869 | 3.07536 |
| 15 | C | 2.58432  | 9.15377  | 3.07388 |
| 16 | C | 3.98684  | 8.75127  | 3.11292 |
| 17 | C | 5.30937  | 15.21540 | 2.93470 |
| 18 | C | 6.01952  | 16.44536 | 2.84331 |
| 19 | C | 7.51454  | 16.44229 | 2.77982 |
| 20 | C | 8.22523  | 15.21038 | 2.82034 |
| 21 | C | 1.42238  | 8.41283  | 3.02163 |
| 22 | C | 0.19130  | 9.12502  | 2.97725 |
| 23 | C | 0.19232  | 10.62208 | 2.97893 |
| 24 | C | 1.42469  | 11.33198 | 3.02447 |
| 25 | C | 8.21680  | 4.52194  | 2.82338 |
| 26 | C | 7.50299  | 3.29164  | 2.78051 |
| 27 | C | 6.00752  | 3.29277  | 2.83458 |
| 28 | C | 5.30052  | 4.52461  | 2.92328 |
| 29 | C | 12.11089 | 11.32784 | 2.89845 |
| 30 | C | 13.34443 | 10.61821 | 2.88141 |
| 31 | C | 13.34603 | 9.12045  | 2.88550 |
| 32 | C | 12.11394 | 8.40739  | 2.90541 |
| 33 | C | 6.91081  | 9.86966  | 5.75196 |
| 34 | N | 6.76768  | 7.88015  | 3.07807 |
| 35 | N | 4.37234  | 7.47491  | 3.09987 |
| 36 | N | 9.16060  | 7.47106  | 2.97803 |
| 37 | N | 8.75295  | 9.86590  | 3.00820 |
| 38 | N | 9.16228  | 12.26073 | 2.97300 |
| 39 | N | 6.76934  | 11.85587 | 3.07841 |
| 40 | N | 4.37514  | 12.26502 | 3.10522 |
| 41 | N | 4.78312  | 9.86954  | 3.14321 |
| 42 | O | 14.49182 | 8.52877  | 2.87654 |
| 43 | O | 14.48855 | 11.21353 | 2.86836 |
| 44 | O | 17.53361 | 11.21710 | 2.93812 |
| 45 | O | 17.53170 | 8.53194  | 2.93475 |

|    |    |          |          |         |
|----|----|----------|----------|---------|
| 46 | O  | 5.41093  | 2.14844  | 2.80218 |
| 47 | O  | 8.09331  | 2.14614  | 2.70151 |
| 48 | O  | 5.42641  | 17.59152 | 2.81540 |
| 49 | O  | 8.10786  | 17.58578 | 2.69512 |
| 50 | O  | 7.95972  | 9.89369  | 6.39505 |
| 51 | O  | 5.70164  | 9.84184  | 6.38527 |
| 52 | H  | 12.10721 | 12.41809 | 2.89662 |
| 53 | H  | 12.11441 | 7.31711  | 2.90884 |
| 54 | H  | 1.42756  | 12.42232 | 3.02048 |
| 55 | H  | 1.42245  | 7.32253  | 3.01556 |
| 56 | H  | 9.31474  | 15.20699 | 2.77603 |
| 57 | H  | 4.21990  | 15.21629 | 2.97713 |
| 58 | H  | 9.30655  | 4.52232  | 2.78400 |
| 59 | H  | 4.21078  | 4.52719  | 2.95952 |
| 60 | H  | 5.84273  | 9.84513  | 7.36326 |
| 61 | Zn | 6.78511  | 9.86748  | 3.68888 |
| 62 | Zn | 16.01315 | 9.87466  | 2.89371 |
| 63 | Zn | 6.74959  | 0.62492  | 2.72255 |

CO@ZnPc-Zn-O

|    | ATOM | X        | Y        | Z       |
|----|------|----------|----------|---------|
| 1  | C    | 5.68845  | 7.08305  | 2.98362 |
| 2  | C    | 6.09456  | 5.68289  | 2.95056 |
| 3  | C    | 7.52510  | 5.68177  | 2.97416 |
| 4  | C    | 7.93206  | 7.08137  | 3.01908 |
| 5  | C    | 9.59978  | 8.74689  | 3.03195 |
| 6  | C    | 10.99960 | 9.15283  | 2.98111 |
| 7  | C    | 10.99997 | 10.58356 | 2.97417 |
| 8  | C    | 9.60054  | 10.99067 | 3.02171 |
| 9  | C    | 7.93471  | 12.65827 | 2.99789 |
| 10 | C    | 7.53034  | 14.05844 | 2.95691 |
| 11 | C    | 6.09969  | 14.06022 | 2.93456 |
| 12 | C    | 5.69099  | 12.66045 | 2.96372 |
| 13 | C    | 4.02299  | 10.99452 | 2.94636 |
| 14 | C    | 2.62287  | 10.58803 | 2.90690 |
| 15 | C    | 2.62292  | 9.15711  | 2.91204 |
| 16 | C    | 4.02249  | 8.75057  | 2.95498 |
| 17 | C    | 5.36306  | 15.22967 | 2.90308 |
| 18 | C    | 6.07582  | 16.45781 | 2.90159 |
| 19 | C    | 7.56440  | 16.45532 | 2.92536 |
| 20 | C    | 8.27208  | 15.22483 | 2.94931 |
| 21 | C    | 1.45549  | 8.41715  | 2.89292 |
| 22 | C    | 0.22590  | 9.12670  | 2.87511 |
| 23 | C    | 0.22519  | 10.61548 | 2.87028 |

|    |    |          |          |          |
|----|----|----------|----------|----------|
| 24 | C  | 1.45442  | 11.32653 | 2.88294  |
| 25 | C  | 8.26385  | 4.51345  | 2.96138  |
| 26 | C  | 7.55284  | 3.28463  | 2.93181  |
| 27 | C  | 6.06424  | 3.28600  | 2.90645  |
| 28 | C  | 5.35480  | 4.51577  | 2.91211  |
| 29 | C  | 12.16748 | 11.32260 | 2.93128  |
| 30 | C  | 13.39640 | 10.61205 | 2.90328  |
| 31 | C  | 13.39622 | 9.12329  | 2.91104  |
| 32 | C  | 12.16700 | 8.41319  | 2.94603  |
| 33 | C  | 6.67749  | 9.91362  | 5.61325  |
| 34 | N  | 6.81027  | 7.87572  | 3.03529  |
| 35 | N  | 4.41373  | 7.47540  | 2.96365  |
| 36 | N  | 9.20732  | 7.47214  | 3.02985  |
| 37 | N  | 8.80717  | 9.86928  | 3.06893  |
| 38 | N  | 9.20935  | 12.26566 | 3.01121  |
| 39 | N  | 6.81173  | 11.86568 | 3.01046  |
| 40 | N  | 4.41563  | 12.26941 | 2.94718  |
| 41 | N  | 4.81634  | 9.87237  | 2.98195  |
| 42 | O  | 14.54573 | 8.52435  | 2.88662  |
| 43 | O  | 14.54596 | 11.21061 | 2.87244  |
| 44 | O  | 17.56064 | 11.21332 | 2.85796  |
| 45 | O  | 17.56211 | 8.52711  | 2.86630  |
| 46 | O  | 5.46468  | 2.13674  | 2.88296  |
| 47 | O  | 8.15070  | 2.13424  | 2.92856  |
| 48 | O  | 5.47946  | 17.60881 | 2.88332  |
| 49 | O  | 8.16557  | 17.60411 | 2.92618  |
| 50 | O  | 6.53983  | 9.95926  | 6.74127  |
| 51 | H  | 12.16772 | 12.41308 | 2.92331  |
| 52 | H  | 12.16702 | 7.32266  | 2.94929  |
| 53 | H  | 1.45338  | 12.41713 | 2.88113  |
| 54 | H  | 1.45608  | 7.32657  | 2.89849  |
| 55 | H  | 9.36254  | 15.22290 | 2.96773  |
| 56 | H  | 4.27259  | 15.23230 | 2.88646  |
| 57 | H  | 9.35431  | 4.51241  | 2.97958  |
| 58 | H  | 4.26440  | 4.51655  | 2.89288  |
| 59 | Zn | 6.80640  | 9.87208  | 3.36717  |
| 60 | Zn | 16.05349 | 9.86754  | 2.85809  |
| 61 | Zn | 6.80550  | 0.62776  | 2.902345 |

CO<sub>2</sub>@ZnPc-**Zn-O**

|   | ATOM | X       | Y       | Z       |
|---|------|---------|---------|---------|
| 1 | C    | 5.65961 | 7.08012 | 2.98686 |
| 2 | C    | 6.06678 | 5.68115 | 3.00651 |
| 3 | C    | 7.49792 | 5.67924 | 2.98650 |

|    |   |          |          |         |
|----|---|----------|----------|---------|
| 4  | C | 7.90753  | 7.07798  | 2.96006 |
| 5  | C | 9.57566  | 8.74385  | 2.91122 |
| 6  | C | 10.97414 | 9.15178  | 2.85602 |
| 7  | C | 10.97422 | 10.58298 | 2.84821 |
| 8  | C | 9.57610  | 10.99168 | 2.90192 |
| 9  | C | 7.90949  | 12.65933 | 2.94912 |
| 10 | C | 7.50240  | 14.05841 | 2.97783 |
| 11 | C | 6.07146  | 14.05929 | 3.01173 |
| 12 | C | 5.66172  | 12.66062 | 2.99287 |
| 13 | C | 3.99284  | 10.99478 | 2.97637 |
| 14 | C | 2.59463  | 10.58646 | 2.91946 |
| 15 | C | 2.59484  | 9.15619  | 2.91092 |
| 16 | C | 3.99253  | 8.74742  | 2.96768 |
| 17 | C | 5.33341  | 15.22725 | 3.05320 |
| 18 | C | 6.04505  | 16.45617 | 3.06027 |
| 19 | C | 7.53416  | 16.45532 | 3.01531 |
| 20 | C | 8.24285  | 15.22555 | 2.97508 |
| 21 | C | 1.42796  | 8.41693  | 2.84410 |
| 22 | C | 0.20064  | 9.12691  | 2.78019 |
| 23 | C | 0.19986  | 10.61452 | 2.79366 |
| 24 | C | 1.42658  | 11.32509 | 2.86581 |
| 25 | C | 8.23533  | 4.51016  | 2.99166 |
| 26 | C | 7.52297  | 3.28198  | 3.02406 |
| 27 | C | 6.03337  | 3.28478  | 3.05013 |
| 28 | C | 5.32511  | 4.51529  | 3.03749 |
| 29 | C | 12.14127 | 11.32230 | 2.79418 |
| 30 | C | 13.37006 | 10.61208 | 2.74901 |
| 31 | C | 13.37035 | 9.12284  | 2.76133 |
| 32 | C | 12.14170 | 8.41244  | 2.81319 |
| 33 | C | 17.21610 | 9.99846  | 6.00560 |
| 34 | N | 6.78414  | 7.87295  | 2.96581 |
| 35 | N | 4.38615  | 7.47387  | 2.97787 |
| 36 | N | 9.18119  | 7.47045  | 2.93020 |
| 37 | N | 8.78237  | 9.86807  | 2.93744 |
| 38 | N | 9.18253  | 12.26529 | 2.91430 |
| 39 | N | 6.78503  | 11.86614 | 2.96231 |
| 40 | N | 4.38770  | 12.26807 | 2.99114 |
| 41 | N | 4.78654  | 9.87082  | 3.00325 |
| 42 | O | 14.51938 | 8.52454  | 2.72292 |
| 43 | O | 14.51851 | 11.21058 | 2.69730 |
| 44 | O | 17.53508 | 11.21260 | 2.74183 |
| 45 | O | 17.53709 | 8.52808  | 2.71445 |
| 46 | O | 5.43299  | 2.13700  | 3.08255 |
| 47 | O | 8.11922  | 2.13176  | 3.03239 |

|    |    |          |          |         |
|----|----|----------|----------|---------|
| 48 | O  | 5.44835  | 17.60549 | 3.10275 |
| 49 | O  | 8.13365  | 17.60399 | 3.01537 |
| 50 | O  | 18.26715 | 10.08787 | 6.51961 |
| 51 | O  | 16.16620 | 9.90831  | 5.47941 |
| 52 | H  | 12.14094 | 12.41275 | 2.78535 |
| 53 | H  | 12.14212 | 7.32194  | 2.81846 |
| 54 | H  | 1.42518  | 12.41544 | 2.87625 |
| 55 | H  | 1.42858  | 7.32654  | 2.83758 |
| 56 | H  | 9.33280  | 15.22489 | 2.94255 |
| 57 | H  | 4.24328  | 15.22776 | 3.08101 |
| 58 | H  | 9.32558  | 4.50789  | 2.97153 |
| 59 | H  | 4.23473  | 4.51800  | 3.05274 |
| 60 | Zn | 6.78420  | 9.86949  | 2.98163 |
| 61 | Zn | 16.02658 | 9.86811  | 2.68006 |
| 62 | Zn | 6.77174  | 0.62661  | 3.07400 |

COOH@ZnPc-**Zn-O**

|    | ATOM | X        | Y        | Z       |
|----|------|----------|----------|---------|
| 1  | C    | 5.61478  | 7.08372  | 2.97002 |
| 2  | C    | 6.02199  | 5.68602  | 2.96217 |
| 3  | C    | 7.45162  | 5.68433  | 2.97942 |
| 4  | C    | 7.86348  | 7.08177  | 2.99964 |
| 5  | C    | 9.53945  | 8.74368  | 3.03296 |
| 6  | C    | 10.94234 | 9.14968  | 3.08266 |
| 7  | C    | 10.94231 | 10.58632 | 3.07803 |
| 8  | C    | 9.53995  | 10.99229 | 3.02721 |
| 9  | C    | 7.86624  | 12.65620 | 2.99077 |
| 10 | C    | 7.45704  | 14.05398 | 2.97087 |
| 11 | C    | 6.02744  | 14.05518 | 2.95651 |
| 12 | C    | 5.61779  | 12.65776 | 2.96457 |
| 13 | C    | 3.94219  | 10.99824 | 2.94277 |
| 14 | C    | 2.53313  | 10.59562 | 2.90823 |
| 15 | C    | 2.53213  | 9.14936  | 2.90923 |
| 16 | C    | 3.94064  | 8.74498  | 2.94466 |
| 17 | C    | 5.28968  | 15.22621 | 2.93672 |
| 18 | C    | 6.00045  | 16.45486 | 2.92862 |
| 19 | C    | 7.48703  | 16.45376 | 2.94006 |
| 20 | C    | 8.19592  | 15.22425 | 2.96235 |
| 21 | C    | 1.38000  | 8.40555  | 2.89292 |
| 22 | C    | 0.13619  | 9.11845  | 2.84794 |
| 23 | C    | 0.13718  | 10.63059 | 2.84677 |
| 24 | C    | 1.38237  | 11.34138 | 2.89108 |
| 25 | C    | 8.18731  | 4.51208  | 2.97161 |
| 26 | C    | 7.47504  | 3.28411  | 2.94624 |

|    |    |          |          |         |
|----|----|----------|----------|---------|
| 27 | C  | 5.98843  | 3.28671  | 2.93074 |
| 28 | C  | 5.28113  | 4.51701  | 2.93909 |
| 29 | C  | 12.10614 | 11.32683 | 3.13436 |
| 30 | C  | 13.33963 | 10.61659 | 3.19648 |
| 31 | C  | 13.34007 | 9.12303  | 3.20265 |
| 32 | C  | 12.10706 | 8.41090  | 3.14516 |
| 33 | C  | 16.93393 | 9.88334  | 5.42322 |
| 34 | N  | 6.73765  | 7.87931  | 2.99338 |
| 35 | N  | 4.33729  | 7.47578  | 2.94954 |
| 36 | N  | 9.13893  | 7.47211  | 3.02347 |
| 37 | N  | 8.74917  | 9.86818  | 3.00446 |
| 38 | N  | 9.14099  | 12.26415 | 3.01366 |
| 39 | N  | 6.73924  | 11.86030 | 2.98632 |
| 40 | N  | 4.33990  | 12.26721 | 2.94570 |
| 41 | N  | 4.72558  | 9.87121  | 2.96983 |
| 42 | O  | 14.48567 | 8.53640  | 3.27309 |
| 43 | O  | 14.48474 | 11.20508 | 3.26126 |
| 44 | O  | 17.48837 | 11.20622 | 2.81923 |
| 45 | O  | 17.48641 | 8.54433  | 2.82151 |
| 46 | O  | 5.38656  | 2.13710  | 2.90945 |
| 47 | O  | 8.07216  | 2.13219  | 2.93613 |
| 48 | O  | 5.40174  | 17.60604 | 2.91108 |
| 49 | O  | 8.08725  | 17.60428 | 2.92987 |
| 50 | O  | 18.15355 | 9.87952  | 5.54065 |
| 51 | O  | 16.08921 | 9.89482  | 6.47030 |
| 52 | H  | 12.10438 | 12.41730 | 3.13512 |
| 53 | H  | 12.10696 | 7.32050  | 3.15438 |
| 54 | H  | 1.38694  | 12.43165 | 2.89605 |
| 55 | H  | 1.38243  | 7.31530  | 2.89917 |
| 56 | H  | 9.28636  | 15.22373 | 2.97174 |
| 57 | H  | 4.19915  | 15.22794 | 2.92762 |
| 58 | H  | 9.27773  | 4.50923  | 2.98349 |
| 59 | H  | 4.19063  | 4.51871  | 2.92714 |
| 60 | H  | 16.59626 | 9.89933  | 7.31942 |
| 61 | Zn | 6.74258  | 9.86956  | 2.99076 |
| 62 | Zn | 16.01663 | 9.87388  | 3.57173 |
| 63 | Zn | 6.72527  | 0.62665  | 2.91302 |

CO@ZnPc-**Zn-O**

|   | ATOM | X       | Y       | Z       |
|---|------|---------|---------|---------|
| 1 | C    | 5.69045 | 7.08284 | 2.85949 |
| 2 | C    | 6.09908 | 5.68593 | 2.89890 |
| 3 | C    | 7.52640 | 5.68470 | 2.90025 |
| 4 | C    | 7.93741 | 7.08094 | 2.85290 |

|    |   |          |          |         |
|----|---|----------|----------|---------|
| 5  | C | 9.60902  | 8.74544  | 2.82486 |
| 6  | C | 11.01076 | 9.15328  | 2.86179 |
| 7  | C | 11.01041 | 10.58821 | 2.84919 |
| 8  | C | 9.60942  | 10.99550 | 2.80908 |
| 9  | C | 7.93997  | 12.66237 | 2.82591 |
| 10 | C | 7.53215  | 14.05908 | 2.87468 |
| 11 | C | 6.10497  | 14.06080 | 2.87598 |
| 12 | C | 5.69393  | 12.66436 | 2.83554 |
| 13 | C | 4.02149  | 10.99973 | 2.84940 |
| 14 | C | 2.62048  | 10.59349 | 2.90957 |
| 15 | C | 2.61949  | 9.15834  | 2.91903 |
| 16 | C | 4.02001  | 8.74970  | 2.86189 |
| 17 | C | 5.36932  | 15.23454 | 2.92574 |
| 18 | C | 6.08016  | 16.46054 | 2.97995 |
| 19 | C | 7.56333  | 16.45806 | 2.98572 |
| 20 | C | 8.27087  | 15.23047 | 2.93030 |
| 21 | C | 1.45644  | 8.42021  | 3.00338 |
| 22 | C | 0.22741  | 9.13179  | 3.09780 |
| 23 | C | 0.22833  | 10.62747 | 3.08380 |
| 24 | C | 1.45893  | 11.33519 | 2.98106 |
| 25 | C | 8.26184  | 4.51107  | 2.95278 |
| 26 | C | 7.55088  | 3.28472  | 3.00118 |
| 27 | C | 6.06770  | 3.28597  | 2.99189 |
| 28 | C | 5.36034  | 4.51388  | 2.94191 |
| 29 | C | 12.17252 | 11.32992 | 2.91027 |
| 30 | C | 13.40315 | 10.62294 | 3.01613 |
| 31 | C | 13.40386 | 9.12728  | 3.03511 |
| 32 | C | 12.17453 | 8.41554  | 2.94041 |
| 33 | C | 15.95552 | 9.95323  | 5.68105 |
| 34 | N | 6.81452  | 7.87934  | 2.82803 |
| 35 | N | 4.41531  | 7.47730  | 2.87088 |
| 36 | N | 9.21324  | 7.47326  | 2.84712 |
| 37 | N | 8.81870  | 9.87051  | 2.79009 |
| 38 | N | 9.21497  | 12.26801 | 2.81993 |
| 39 | N | 6.81612  | 11.86571 | 2.80208 |
| 40 | N | 4.41832  | 12.27164 | 2.84884 |
| 41 | N | 4.81060  | 9.87411  | 2.81920 |
| 42 | O | 14.54303 | 8.53385  | 3.15787 |
| 43 | O | 14.54186 | 11.22100 | 3.11865 |
| 44 | O | 17.57465 | 11.22486 | 3.18117 |
| 45 | O | 17.57314 | 8.53756  | 3.21022 |
| 46 | O | 5.46557  | 2.13337  | 3.03182 |
| 47 | O | 8.15001  | 2.13112  | 3.05305 |
| 48 | O | 5.48120  | 17.61435 | 3.02734 |

|    |    |          |          |         |
|----|----|----------|----------|---------|
| 49 | O  | 8.16575  | 17.60989 | 3.04203 |
| 50 | O  | 15.86481 | 10.01639 | 6.81146 |
| 51 | H  | 12.16991 | 12.42043 | 2.90575 |
| 52 | H  | 12.17441 | 7.32531  | 2.95866 |
| 53 | H  | 1.46125  | 12.42573 | 2.97963 |
| 54 | H  | 1.45682  | 7.32992  | 3.01879 |
| 55 | H  | 9.36147  | 15.22889 | 2.93594 |
| 56 | H  | 4.27853  | 15.23695 | 2.92577 |
| 57 | H  | 9.35245  | 4.50950  | 2.96011 |
| 58 | H  | 4.26951  | 4.51454  | 2.93863 |
| 59 | Zn | 6.81403  | 9.87206  | 2.78940 |
| 60 | Zn | 16.05423 | 9.88325  | 3.50542 |
| 61 | Zn | 6.80615  | 0.62890  | 3.06946 |

#### CuPc-Cu-O

|    | ATOM | X        | Y        | Z       |
|----|------|----------|----------|---------|
| 1  | C    | 5.66418  | 7.04679  | 3.04084 |
| 2  | C    | 6.06998  | 5.64952  | 3.04332 |
| 3  | C    | 7.49541  | 5.64875  | 3.03105 |
| 4  | C    | 7.90200  | 7.04588  | 3.02967 |
| 5  | C    | 9.54860  | 8.69282  | 3.03021 |
| 6  | C    | 10.94432 | 9.09900  | 3.03097 |
| 7  | C    | 10.94413 | 10.52232 | 3.03225 |
| 8  | C    | 9.54944  | 10.92808 | 3.03134 |
| 9  | C    | 7.90300  | 12.57504 | 3.02478 |
| 10 | C    | 7.49767  | 13.97221 | 3.01758 |
| 11 | C    | 6.07030  | 13.97232 | 3.02140 |
| 12 | C    | 5.66437  | 12.57522 | 3.02760 |
| 13 | C    | 4.01662  | 10.92911 | 3.03223 |
| 14 | C    | 2.62161  | 10.52347 | 3.02994 |
| 15 | C    | 2.62139  | 9.10001  | 3.03055 |
| 16 | C    | 4.01718  | 8.69375  | 3.03575 |
| 17 | C    | 5.32288  | 15.13556 | 3.02111 |
| 18 | C    | 6.04787  | 16.35267 | 3.01877 |
| 19 | C    | 7.52021  | 16.35261 | 3.01076 |
| 20 | C    | 8.24523  | 15.13546 | 3.00988 |
| 21 | C    | 1.45294  | 8.35502  | 3.02595 |
| 22 | C    | 0.23747  | 9.08010  | 3.02257 |
| 23 | C    | 0.23781  | 10.54585 | 3.02362 |
| 24 | C    | 1.45346  | 11.26957 | 3.02679 |
| 25 | C    | 8.24183  | 4.48352  | 3.02172 |
| 26 | C    | 7.51520  | 3.26827  | 3.02665 |
| 27 | C    | 6.04651  | 3.26935  | 3.04461 |
| 28 | C    | 5.32190  | 4.48559  | 3.05308 |

|    |    |          |          |         |
|----|----|----------|----------|---------|
| 29 | C  | 12.11193 | 11.26874 | 3.03126 |
| 30 | C  | 13.32749 | 10.54514 | 3.02795 |
| 31 | C  | 13.32798 | 9.07937  | 3.02657 |
| 32 | C  | 12.11272 | 8.35404  | 3.02843 |
| 33 | N  | 6.78328  | 7.85352  | 3.03402 |
| 34 | N  | 4.39235  | 7.42050  | 3.04073 |
| 35 | N  | 9.17385  | 7.41941  | 3.02745 |
| 36 | N  | 8.73961  | 9.80992  | 3.03144 |
| 37 | N  | 9.17469  | 12.20082 | 3.02741 |
| 38 | N  | 6.78357  | 11.76881 | 3.02997 |
| 39 | N  | 4.39241  | 12.20158 | 3.02955 |
| 40 | N  | 4.82613  | 9.81076  | 3.03570 |
| 41 | O  | 14.50254 | 8.50183  | 3.02299 |
| 42 | O  | 14.50191 | 11.12370 | 3.02531 |
| 43 | O  | 17.33657 | 11.12404 | 3.02150 |
| 44 | O  | 17.33634 | 8.50246  | 3.01904 |
| 45 | O  | 5.47008  | 2.09672  | 3.04987 |
| 46 | O  | 8.08905  | 2.09446  | 3.01557 |
| 47 | O  | 5.47324  | 17.52303 | 3.02494 |
| 48 | O  | 8.09438  | 17.52314 | 3.00679 |
| 49 | H  | 12.11251 | 12.35888 | 3.03192 |
| 50 | H  | 12.11520 | 7.26389  | 3.02682 |
| 51 | H  | 1.45255  | 12.35971 | 3.02707 |
| 52 | H  | 1.45046  | 7.26487  | 3.02477 |
| 53 | H  | 9.33514  | 15.13729 | 3.00466 |
| 54 | H  | 4.23305  | 15.13754 | 3.02492 |
| 55 | H  | 9.33182  | 4.48156  | 3.00910 |
| 56 | H  | 4.23196  | 4.48531  | 3.06615 |
| 57 | Cu | 15.91894 | 9.81334  | 3.02063 |
| 58 | Cu | 6.77780  | 0.68077  | 3.02375 |
| 59 | Cu | 6.78274  | 9.81078  | 3.03356 |

CO<sub>2</sub>@*CuPc*-Cu-O

|    | ATOM | X        | Y        | Z       |
|----|------|----------|----------|---------|
| 1  | C    | 5.66342  | 7.04563  | 2.93643 |
| 2  | C    | 6.06930  | 5.64999  | 2.96393 |
| 3  | C    | 7.49393  | 5.64933  | 2.96515 |
| 4  | C    | 7.90067  | 7.04493  | 2.93818 |
| 5  | C    | 9.54872  | 8.69084  | 2.93577 |
| 6  | C    | 10.94491 | 9.09721  | 2.95818 |
| 7  | C    | 10.94461 | 10.52191 | 2.95316 |
| 8  | C    | 9.54889  | 10.92769 | 2.92828 |
| 9  | C    | 7.90174  | 12.57384 | 2.92659 |
| 10 | C    | 7.49563  | 13.96947 | 2.95397 |

|    |   |          |          |         |
|----|---|----------|----------|---------|
| 11 | C | 6.07108  | 13.96928 | 2.95822 |
| 12 | C | 5.66492  | 12.57377 | 2.93280 |
| 13 | C | 4.01639  | 10.92857 | 2.93710 |
| 14 | C | 2.62029  | 10.52341 | 2.96190 |
| 15 | C | 2.61953  | 9.09862  | 2.96131 |
| 16 | C | 4.01555  | 8.69178  | 2.93645 |
| 17 | C | 5.32405  | 15.13461 | 2.98876 |
| 18 | C | 6.04888  | 16.35020 | 3.01493 |
| 19 | C | 7.51671  | 16.35043 | 3.01141 |
| 20 | C | 8.24222  | 15.13524 | 2.98057 |
| 21 | C | 1.45264  | 8.35336  | 2.98809 |
| 22 | C | 0.23746  | 9.07941  | 3.01432 |
| 23 | C | 0.23820  | 10.54695 | 3.01409 |
| 24 | C | 1.45459  | 11.27084 | 2.98876 |
| 25 | C | 8.23973  | 4.48294  | 2.99306 |
| 26 | C | 7.51361  | 3.26781  | 3.01904 |
| 27 | C | 6.04580  | 3.26889  | 3.01839 |
| 28 | C | 5.32175  | 4.48490  | 2.99105 |
| 29 | C | 12.11030 | 11.26933 | 2.97779 |
| 30 | C | 13.32632 | 10.54538 | 3.00699 |
| 31 | C | 13.32703 | 9.07788  | 3.01147 |
| 32 | C | 12.11171 | 8.35184  | 2.98758 |
| 33 | C | 6.81202  | 9.82027  | 6.19936 |
| 34 | N | 6.78221  | 7.85337  | 2.91742 |
| 35 | N | 4.39095  | 7.41978  | 2.94013 |
| 36 | N | 9.17317  | 7.41884  | 2.94294 |
| 37 | N | 8.74036  | 9.80916  | 2.91593 |
| 38 | N | 9.17406  | 12.19979 | 2.92903 |
| 39 | N | 6.78331  | 11.76557 | 2.91032 |
| 40 | N | 4.39249  | 12.20022 | 2.94057 |
| 41 | N | 4.82420  | 9.80975  | 2.91970 |
| 42 | O | 14.50091 | 8.50307  | 3.03812 |
| 43 | O | 14.49951 | 11.12205 | 3.03065 |
| 44 | O | 17.33822 | 11.12315 | 3.03735 |
| 45 | O | 17.33708 | 8.50439  | 3.03849 |
| 46 | O | 5.46859  | 2.09628  | 3.04264 |
| 47 | O | 8.08829  | 2.09402  | 3.04343 |
| 48 | O | 5.47264  | 17.52314 | 3.04260 |
| 49 | O | 8.09241  | 17.52360 | 3.03716 |
| 50 | O | 7.46916  | 8.84522  | 6.18985 |
| 51 | O | 6.15483  | 10.79518 | 6.18772 |
| 52 | H | 12.11086 | 12.35949 | 2.97622 |
| 53 | H | 12.11408 | 7.26176  | 2.99341 |
| 54 | H | 1.45433  | 12.36098 | 2.99077 |

|    |    |          |          |         |
|----|----|----------|----------|---------|
| 55 | H  | 1.44986  | 7.26326  | 2.98949 |
| 56 | H  | 9.33233  | 15.13691 | 2.97876 |
| 57 | H  | 4.23401  | 15.13533 | 2.99324 |
| 58 | H  | 9.32984  | 4.48099  | 2.99487 |
| 59 | H  | 4.23167  | 4.48472  | 2.99137 |
| 60 | Cu | 15.91858 | 9.81381  | 3.04613 |
| 61 | Cu | 6.77668  | 0.67767  | 3.05203 |
| 62 | Cu | 6.78202  | 9.80922  | 2.89203 |

COOH@*CuPc*-Cu-O

|    | ATOM | X        | Y        | Z       |
|----|------|----------|----------|---------|
| 1  | C    | 5.66999  | 7.04073  | 3.03521 |
| 2  | C    | 6.07653  | 5.64525  | 3.02225 |
| 3  | C    | 7.50185  | 5.64416  | 3.00819 |
| 4  | C    | 7.91021  | 7.04016  | 3.01228 |
| 5  | C    | 9.55510  | 8.69070  | 2.97702 |
| 6  | C    | 10.95013 | 9.09690  | 2.99963 |
| 7  | C    | 10.94966 | 10.52165 | 2.99624 |
| 8  | C    | 9.55569  | 10.92645 | 2.97173 |
| 9  | C    | 7.91045  | 12.57740 | 3.00253 |
| 10 | C    | 7.50329  | 13.97083 | 3.01457 |
| 11 | C    | 6.07793  | 13.97073 | 3.02744 |
| 12 | C    | 5.67051  | 12.57777 | 3.02339 |
| 13 | C    | 4.02402  | 10.92842 | 3.01950 |
| 14 | C    | 2.63119  | 10.52271 | 3.04124 |
| 15 | C    | 2.63085  | 9.09812  | 3.04668 |
| 16 | C    | 4.02479  | 8.69120  | 3.02702 |
| 17 | C    | 5.33056  | 15.13635 | 3.02208 |
| 18 | C    | 6.05438  | 16.35113 | 3.01094 |
| 19 | C    | 7.52347  | 16.35161 | 2.99804 |
| 20 | C    | 8.24906  | 15.13751 | 2.99627 |
| 21 | C    | 1.46318  | 8.35318  | 3.04252 |
| 22 | C    | 0.24756  | 9.07833  | 3.03844 |
| 23 | C    | 0.24816  | 10.54749 | 3.03343 |
| 24 | C    | 1.46421  | 11.26997 | 3.03195 |
| 25 | C    | 8.24648  | 4.47812  | 2.99375 |
| 26 | C    | 7.51902  | 3.26358  | 2.99793 |
| 27 | C    | 6.05184  | 3.26522  | 3.01179 |
| 28 | C    | 5.32841  | 4.48132  | 3.02167 |
| 29 | C    | 12.11569 | 11.26934 | 2.99804 |
| 30 | C    | 13.33216 | 10.54691 | 3.00849 |
| 31 | C    | 13.33299 | 9.07753  | 3.01196 |
| 32 | C    | 12.11713 | 8.35194  | 3.00463 |
| 33 | C    | 6.81955  | 9.85588  | 5.35150 |

|    |    |          |          |         |
|----|----|----------|----------|---------|
| 34 | N  | 6.79066  | 7.84449  | 3.02871 |
| 35 | N  | 4.39930  | 7.41750  | 3.04952 |
| 36 | N  | 9.18131  | 7.41657  | 3.00513 |
| 37 | N  | 8.75024  | 9.80714  | 2.92622 |
| 38 | N  | 9.18152  | 12.19930 | 2.99975 |
| 39 | N  | 6.79003  | 11.77138 | 2.99438 |
| 40 | N  | 4.39927  | 12.20062 | 3.04045 |
| 41 | N  | 4.83033  | 9.80812  | 2.97803 |
| 42 | O  | 14.50372 | 8.49798  | 3.02546 |
| 43 | O  | 14.50274 | 11.12793 | 3.01877 |
| 44 | O  | 17.35030 | 11.12828 | 3.03256 |
| 45 | O  | 17.34978 | 8.49853  | 3.04128 |
| 46 | O  | 5.47155  | 2.09352  | 3.01638 |
| 47 | O  | 8.09567  | 2.09042  | 2.99172 |
| 48 | O  | 5.47582  | 17.52315 | 3.01488 |
| 49 | O  | 8.10026  | 17.52437 | 2.99193 |
| 50 | O  | 7.88652  | 9.88138  | 5.91752 |
| 51 | O  | 5.59650  | 9.82894  | 5.84087 |
| 52 | H  | 12.11553 | 12.35962 | 2.99437 |
| 53 | H  | 12.12018 | 7.26171  | 3.00562 |
| 54 | H  | 1.46415  | 12.36024 | 3.02471 |
| 55 | H  | 1.46027  | 7.26293  | 3.04326 |
| 56 | H  | 9.33927  | 15.13987 | 2.98498 |
| 57 | H  | 4.24035  | 15.13702 | 3.02947 |
| 58 | H  | 9.33665  | 4.47464  | 2.98395 |
| 59 | H  | 4.23830  | 4.48162  | 3.03206 |
| 60 | H  | 5.60963  | 9.82895  | 6.83334 |
| 61 | Cu | 15.92681 | 9.81395  | 3.03182 |
| 62 | Cu | 6.78133  | 0.67605  | 3.00245 |
| 63 | Cu | 6.78973  | 9.81267  | 3.16583 |

CO@*CuPc*-Cu-O

|    | ATOM | X        | Y        | Z       |
|----|------|----------|----------|---------|
| 1  | C    | 5.68115  | 7.03203  | 2.95277 |
| 2  | C    | 6.08663  | 5.63601  | 2.96500 |
| 3  | C    | 7.51096  | 5.63507  | 2.94909 |
| 4  | C    | 7.91756  | 7.03098  | 2.92721 |
| 5  | C    | 9.56594  | 8.67760  | 2.92121 |
| 6  | C    | 10.96324 | 9.08405  | 2.94128 |
| 7  | C    | 10.96278 | 10.50927 | 2.94747 |
| 8  | C    | 9.56581  | 10.91464 | 2.93160 |
| 9  | C    | 7.91809  | 12.56110 | 2.95252 |
| 10 | C    | 7.51221  | 13.95669 | 2.97149 |
| 11 | C    | 6.08814  | 13.95681 | 2.98810 |

|    |   |          |          |         |
|----|---|----------|----------|---------|
| 12 | C | 5.68184  | 12.56148 | 2.97882 |
| 13 | C | 4.03317  | 10.91599 | 2.98740 |
| 14 | C | 2.63628  | 10.51045 | 3.00109 |
| 15 | C | 2.63593  | 9.08538  | 2.99399 |
| 16 | C | 4.03295  | 8.67860  | 2.97619 |
| 17 | C | 5.34144  | 15.12276 | 3.01312 |
| 18 | C | 6.06624  | 16.33811 | 3.02069 |
| 19 | C | 7.53317  | 16.33817 | 3.00415 |
| 20 | C | 8.25845  | 15.12311 | 2.97985 |
| 21 | C | 1.46979  | 8.33974  | 3.00336 |
| 22 | C | 0.25395  | 9.06556  | 3.02010 |
| 23 | C | 0.25433  | 10.53342 | 3.02711 |
| 24 | C | 1.47099  | 11.25778 | 3.01773 |
| 25 | C | 8.25607  | 4.46803  | 2.96077 |
| 26 | C | 7.52981  | 3.25321  | 2.98893 |
| 27 | C | 6.06272  | 3.25455  | 3.00484 |
| 28 | C | 5.33906  | 4.47086  | 2.99261 |
| 29 | C | 12.12727 | 11.25693 | 2.97558 |
| 30 | C | 13.34372 | 10.53255 | 2.99812 |
| 31 | C | 13.34440 | 9.06476  | 2.99219 |
| 32 | C | 12.12895 | 8.33844  | 2.96327 |
| 33 | C | 6.59234  | 10.04643 | 5.94893 |
| 34 | N | 6.79947  | 7.83859  | 2.92556 |
| 35 | N | 4.40841  | 7.40691  | 2.97125 |
| 36 | N | 9.19043  | 7.40559  | 2.92187 |
| 37 | N | 8.75884  | 9.79604  | 2.91326 |
| 38 | N | 9.19062  | 12.18658 | 2.94217 |
| 39 | N | 6.79968  | 11.75333 | 2.95749 |
| 40 | N | 4.40900  | 12.18756 | 2.99342 |
| 41 | N | 4.84068  | 9.79714  | 2.97192 |
| 42 | O | 14.51788 | 8.48997  | 3.01485 |
| 43 | O | 14.51673 | 11.10842 | 3.02499 |
| 44 | O | 17.35429 | 11.10946 | 3.04147 |
| 45 | O | 17.35377 | 8.49003  | 3.02943 |
| 46 | O | 5.48463  | 2.08198  | 3.03111 |
| 47 | O | 8.10497  | 2.07907  | 3.00289 |
| 48 | O | 5.48897  | 17.51143 | 3.04111 |
| 49 | O | 8.10969  | 17.51186 | 3.01191 |
| 50 | O | 5.87007  | 10.66976 | 6.57859 |
| 51 | H | 12.12764 | 12.34699 | 2.98317 |
| 52 | H | 12.13184 | 7.24843  | 2.96192 |
| 53 | H | 1.47042  | 12.34796 | 3.02197 |
| 54 | H | 1.46724  | 7.24968  | 2.99699 |
| 55 | H | 9.34857  | 15.12475 | 2.96848 |

|    |    |          |          |         |
|----|----|----------|----------|---------|
| 56 | H  | 4.25129  | 15.12301 | 3.02614 |
| 57 | H  | 9.34620  | 4.46557  | 2.95047 |
| 58 | H  | 4.24890  | 4.47178  | 3.00561 |
| 59 | Cu | 15.93563 | 9.79949  | 3.03429 |
| 60 | Cu | 6.79298  | 0.66399  | 3.02846 |
| 61 | Cu | 6.80049  | 9.79516  | 2.94687 |

CO<sub>2</sub>@CuPc-**Cu-O**

|    | ATOM | X        | Y        | Z       |
|----|------|----------|----------|---------|
| 1  | C    | 5.66395  | 7.04762  | 3.05846 |
| 2  | C    | 6.06984  | 5.65224  | 3.06034 |
| 3  | C    | 7.49390  | 5.65123  | 3.05488 |
| 4  | C    | 7.90111  | 7.04656  | 3.05107 |
| 5  | C    | 9.55131  | 8.69135  | 3.02117 |
| 6  | C    | 10.94903 | 9.09752  | 2.97058 |
| 7  | C    | 10.94858 | 10.52319 | 2.96917 |
| 8  | C    | 9.55116  | 10.92858 | 3.01857 |
| 9  | C    | 7.90157  | 12.57356 | 3.04262 |
| 10 | C    | 7.49523  | 13.96889 | 3.04422 |
| 11 | C    | 6.07126  | 13.96873 | 3.04692 |
| 12 | C    | 5.66480  | 12.57359 | 3.04649 |
| 13 | C    | 4.01403  | 10.92953 | 3.02745 |
| 14 | C    | 2.61641  | 10.52432 | 2.97604 |
| 15 | C    | 2.61584  | 9.09861  | 2.97993 |
| 16 | C    | 4.01350  | 8.69241  | 3.03341 |
| 17 | C    | 5.32475  | 15.13547 | 3.04100 |
| 18 | C    | 6.04900  | 16.35121 | 3.03316 |
| 19 | C    | 7.51586  | 16.35148 | 3.02938 |
| 20 | C    | 8.24099  | 15.13609 | 3.03469 |
| 21 | C    | 1.45093  | 8.35309  | 2.92472 |
| 22 | C    | 0.23646  | 9.07928  | 2.85512 |
| 23 | C    | 0.23712  | 10.54679 | 2.85126 |
| 24 | C    | 1.45257  | 11.27142 | 2.91686 |
| 25 | C    | 8.23855  | 4.48322  | 3.04324 |
| 26 | C    | 7.51252  | 3.26817  | 3.03755 |
| 27 | C    | 6.04569  | 3.26955  | 3.04392 |
| 28 | C    | 5.32256  | 4.48598  | 3.05531 |
| 29 | C    | 12.11241 | 11.27043 | 2.91264 |
| 30 | C    | 13.32778 | 10.54606 | 2.84727 |
| 31 | C    | 13.32850 | 9.07858  | 2.84883 |
| 32 | C    | 12.11408 | 8.35223  | 2.91545 |
| 33 | C    | 15.91647 | 9.83082  | 6.04553 |
| 34 | N    | 6.78280  | 7.85572  | 3.05688 |
| 35 | N    | 4.39053  | 7.42129  | 3.04512 |

|    |    |          |          |         |
|----|----|----------|----------|---------|
| 36 | N  | 9.17454  | 7.42003  | 3.03247 |
| 37 | N  | 8.74472  | 9.80986  | 3.04523 |
| 38 | N  | 9.17477  | 12.19986 | 3.02668 |
| 39 | N  | 6.78311  | 11.76484 | 3.04760 |
| 40 | N  | 4.39135  | 12.20050 | 3.03339 |
| 41 | N  | 4.82008  | 9.81074  | 3.05893 |
| 42 | O  | 14.50116 | 8.50465  | 2.78469 |
| 43 | O  | 14.49982 | 11.12138 | 2.78165 |
| 44 | O  | 17.33855 | 11.12174 | 2.78274 |
| 45 | O  | 17.33744 | 8.50519  | 2.78943 |
| 46 | O  | 5.46693  | 2.09656  | 3.03616 |
| 47 | O  | 8.08819  | 2.09377  | 3.02452 |
| 48 | O  | 5.47119  | 17.52464 | 3.02775 |
| 49 | O  | 8.09263  | 17.52531 | 3.02006 |
| 50 | O  | 17.09237 | 9.83374  | 6.03664 |
| 51 | O  | 14.74064 | 9.82772  | 6.03939 |
| 52 | H  | 12.11313 | 12.36049 | 2.91183 |
| 53 | H  | 12.11702 | 7.26220  | 2.91651 |
| 54 | H  | 1.45180  | 12.36150 | 2.91376 |
| 55 | H  | 1.44811  | 7.26306  | 2.92748 |
| 56 | H  | 9.33124  | 15.13802 | 3.02959 |
| 57 | H  | 4.23457  | 15.13651 | 3.04055 |
| 58 | H  | 9.32879  | 4.48050  | 3.03548 |
| 59 | H  | 4.23237  | 4.48602  | 3.05685 |
| 60 | Cu | 15.91883 | 9.81366  | 2.74782 |
| 61 | Cu | 6.77564  | 0.67839  | 3.02283 |
| 62 | Cu | 6.78241  | 9.81020  | 3.05927 |

COOH@CuPc-**Cu-O**

|    | ATOM | X        | Y        | Z       |
|----|------|----------|----------|---------|
| 1  | C    | 5.64597  | 7.04799  | 3.07025 |
| 2  | C    | 6.05231  | 5.65443  | 3.06683 |
| 3  | C    | 7.47235  | 5.65443  | 3.05525 |
| 4  | C    | 7.87816  | 7.04762  | 3.05522 |
| 5  | C    | 9.52308  | 8.69425  | 3.04673 |
| 6  | C    | 10.92023 | 9.10025  | 3.03904 |
| 7  | C    | 10.91908 | 10.52674 | 3.03135 |
| 8  | C    | 9.52264  | 10.93088 | 3.03595 |
| 9  | C    | 7.87836  | 12.57757 | 3.03317 |
| 10 | C    | 7.47347  | 13.97073 | 3.03133 |
| 11 | C    | 6.05351  | 13.97157 | 3.04109 |
| 12 | C    | 5.64674  | 12.57824 | 3.04567 |
| 13 | C    | 4.00219  | 10.93186 | 3.05259 |
| 14 | C    | 2.60624  | 10.52795 | 3.01894 |

|    |   |          |          |         |
|----|---|----------|----------|---------|
| 15 | C | 2.60503  | 9.10064  | 3.02908 |
| 16 | C | 4.00152  | 8.69510  | 3.06625 |
| 17 | C | 5.30932  | 15.14191 | 3.04260 |
| 18 | C | 6.03406  | 16.35625 | 3.03372 |
| 19 | C | 7.49658  | 16.35541 | 3.02200 |
| 20 | C | 8.21931  | 15.14049 | 3.02064 |
| 21 | C | 1.44446  | 8.35434  | 3.02193 |
| 22 | C | 0.22670  | 9.07783  | 2.92247 |
| 23 | C | 0.22867  | 10.55621 | 2.90652 |
| 24 | C | 1.44762  | 11.27743 | 2.99847 |
| 25 | C | 8.21706  | 4.48383  | 3.04022 |
| 26 | C | 7.49339  | 3.26932  | 3.03768 |
| 27 | C | 6.03098  | 3.26960  | 3.05088 |
| 28 | C | 5.30736  | 4.48452  | 3.06574 |
| 29 | C | 12.07822 | 11.27650 | 3.04841 |
| 30 | C | 13.29896 | 10.55525 | 3.00625 |
| 31 | C | 13.30090 | 9.07943  | 3.02036 |
| 32 | C | 12.08151 | 8.35451  | 3.06658 |
| 33 | C | 16.20383 | 9.86173  | 5.16054 |
| 34 | N | 6.76201  | 7.85996  | 3.06126 |
| 35 | N | 4.37254  | 7.42268  | 3.07149 |
| 36 | N | 9.15231  | 7.42198  | 3.04994 |
| 37 | N | 8.71750  | 9.81204  | 3.04970 |
| 38 | N | 9.15218  | 12.20302 | 3.02996 |
| 39 | N | 6.76218  | 11.76560 | 3.03972 |
| 40 | N | 4.37336  | 12.20410 | 3.04694 |
| 41 | N | 4.80638  | 9.81297  | 3.08451 |
| 42 | O | 14.46190 | 8.50278  | 2.97374 |
| 43 | O | 14.45783 | 11.13489 | 2.93766 |
| 44 | O | 17.34836 | 11.13313 | 2.78615 |
| 45 | O | 17.34407 | 8.50226  | 2.82341 |
| 46 | O | 5.44844  | 2.09524  | 3.04662 |
| 47 | O | 8.07551  | 2.09444  | 3.02278 |
| 48 | O | 5.45260  | 17.53110 | 3.03545 |
| 49 | O | 8.07977  | 17.52978 | 3.01369 |
| 50 | O | 17.32725 | 9.86369  | 5.61201 |
| 51 | O | 15.04444 | 9.87976  | 5.79089 |
| 52 | H | 12.07650 | 12.36643 | 3.06443 |
| 53 | H | 12.08405 | 7.26492  | 3.09643 |
| 54 | H | 1.44878  | 12.36743 | 3.01239 |
| 55 | H | 1.44183  | 7.26477  | 3.05408 |
| 56 | H | 9.30968  | 15.14138 | 3.01124 |
| 57 | H | 4.21911  | 15.14492 | 3.05037 |
| 58 | H | 9.30743  | 4.48215  | 3.02834 |

|    |    |          |         |         |
|----|----|----------|---------|---------|
| 59 | H  | 4.21716  | 4.48253 | 3.07393 |
| 60 | H  | 15.17417 | 9.89592 | 6.77353 |
| 61 | Cu | 15.91606 | 9.82583 | 3.18627 |
| 62 | Cu | 6.76127  | 0.68104 | 3.02662 |
| 63 | Cu | 6.76211  | 9.81268 | 3.05937 |

CO@CuPc-*Cu*-O

|    | ATOM | X        | Y        | Z       |
|----|------|----------|----------|---------|
| 1  | C    | 5.68188  | 7.04917  | 3.02553 |
| 2  | C    | 6.08719  | 5.65271  | 3.03282 |
| 3  | C    | 7.51193  | 5.65178  | 3.04408 |
| 4  | C    | 7.91885  | 7.04846  | 3.04201 |
| 5  | C    | 9.56606  | 8.69538  | 3.03876 |
| 6  | C    | 10.96246 | 9.10214  | 3.03106 |
| 7  | C    | 10.96174 | 10.52579 | 3.02120 |
| 8  | C    | 9.56568  | 10.93131 | 3.02549 |
| 9  | C    | 7.91918  | 12.57825 | 3.01845 |
| 10 | C    | 7.51328  | 13.97492 | 3.01960 |
| 11 | C    | 6.08837  | 13.97484 | 3.01154 |
| 12 | C    | 5.68264  | 12.57850 | 3.00637 |
| 13 | C    | 4.03538  | 10.93239 | 2.99351 |
| 14 | C    | 2.63873  | 10.52727 | 2.98013 |
| 15 | C    | 2.63802  | 9.10218  | 2.98746 |
| 16 | C    | 4.03467  | 8.69589  | 3.00275 |
| 17 | C    | 5.34138  | 15.14014 | 3.01124 |
| 18 | C    | 6.06622  | 16.35583 | 3.02068 |
| 19 | C    | 7.53404  | 16.35605 | 3.02957 |
| 20 | C    | 8.25973  | 15.14061 | 3.02885 |
| 21 | C    | 1.47180  | 8.35662  | 2.98194 |
| 22 | C    | 0.25597  | 9.08272  | 2.96735 |
| 23 | C    | 0.25691  | 10.55111 | 2.95719 |
| 24 | C    | 1.47392  | 11.27495 | 2.96432 |
| 25 | C    | 8.25733  | 4.48536  | 3.05183 |
| 26 | C    | 7.53072  | 3.27017  | 3.04625 |
| 27 | C    | 6.06295  | 3.27157  | 3.03476 |
| 28 | C    | 5.33927  | 4.48805  | 3.02809 |
| 29 | C    | 12.12768 | 11.27336 | 3.00680 |
| 30 | C    | 13.34375 | 10.54992 | 2.99809 |
| 31 | C    | 13.34486 | 9.08373  | 3.01196 |
| 32 | C    | 12.13014 | 8.35736  | 3.02934 |
| 33 | C    | 15.58716 | 9.92204  | 5.83711 |
| 34 | N    | 6.80056  | 7.85640  | 3.03276 |
| 35 | N    | 4.40956  | 7.42358  | 3.01223 |
| 36 | N    | 9.19151  | 7.42267  | 3.04445 |

|    |    |          |          |         |
|----|----|----------|----------|---------|
| 37 | N  | 8.75750  | 9.81309  | 3.03597 |
| 38 | N  | 9.19156  | 12.20391 | 3.02039 |
| 39 | N  | 6.80076  | 11.77082 | 3.01277 |
| 40 | N  | 4.41031  | 12.20457 | 2.99576 |
| 41 | N  | 4.84243  | 9.81384  | 3.00491 |
| 42 | O  | 14.51995 | 8.50794  | 3.00377 |
| 43 | O  | 14.51779 | 11.12774 | 2.97463 |
| 44 | O  | 17.35858 | 11.12833 | 2.94147 |
| 45 | O  | 17.35668 | 8.50731  | 2.96138 |
| 46 | O  | 5.48589  | 2.09891  | 3.03001 |
| 47 | O  | 8.10527  | 2.09640  | 3.04938 |
| 48 | O  | 5.49020  | 17.52901 | 3.02288 |
| 49 | O  | 8.10959  | 17.52932 | 3.03845 |
| 50 | O  | 14.54172 | 9.99324  | 6.29653 |
| 51 | H  | 12.12720 | 12.36341 | 2.99673 |
| 52 | H  | 12.13277 | 7.26731  | 3.03624 |
| 53 | H  | 1.47379  | 12.36502 | 2.95887 |
| 54 | H  | 1.46949  | 7.26657  | 2.99023 |
| 55 | H  | 9.34978  | 15.14276 | 3.03661 |
| 56 | H  | 4.25146  | 15.14117 | 3.00519 |
| 57 | H  | 9.34751  | 4.48226  | 3.06055 |
| 58 | H  | 4.24925  | 4.48814  | 3.01828 |
| 59 | Cu | 15.93799 | 9.81879  | 2.97973 |
| 60 | Cu | 6.79383  | 0.68186  | 3.03578 |
| 61 | Cu | 6.80029  | 9.81348  | 3.02384 |

# NiPc-Co-O

|    | ATOM | X        | Y        | Z       |
|----|------|----------|----------|---------|
| 1  | C    | 5.50188  | 6.94103  | 2.35200 |
| 2  | C    | 5.90356  | 5.55102  | 2.35144 |
| 3  | C    | 7.32033  | 5.54945  | 2.34596 |
| 4  | C    | 7.72470  | 6.93898  | 2.34804 |
| 5  | C    | 9.34629  | 8.55841  | 2.34846 |
| 6  | C    | 10.73631 | 8.96137  | 2.34686 |
| 7  | C    | 10.73614 | 10.37816 | 2.34986 |
| 8  | C    | 9.34660  | 10.78133 | 2.34983 |
| 9  | C    | 7.72713  | 12.40299 | 2.34104 |
| 10 | C    | 7.32541  | 13.79306 | 2.33292 |
| 11 | C    | 5.90862  | 13.79454 | 2.33777 |
| 12 | C    | 5.50429  | 12.40494 | 2.34430 |
| 13 | C    | 3.88306  | 10.78521 | 2.34482 |
| 14 | C    | 2.49307  | 10.38259 | 2.33918 |
| 15 | C    | 2.49289  | 8.96583  | 2.33643 |
| 16 | C    | 3.88240  | 8.56242  | 2.34392 |

|    |    |          |          |         |
|----|----|----------|----------|---------|
| 17 | C  | 5.15453  | 14.96349 | 2.33565 |
| 18 | C  | 5.89806  | 16.15271 | 2.32793 |
| 19 | C  | 7.34224  | 16.15086 | 2.32020 |
| 20 | C  | 8.08256  | 14.95984 | 2.32239 |
| 21 | C  | 1.32527  | 8.21005  | 2.32798 |
| 22 | C  | 0.13527  | 8.95189  | 2.32523 |
| 23 | C  | 0.13509  | 10.39608 | 2.33026 |
| 24 | C  | 1.32511  | 11.13816 | 2.33626 |
| 25 | C  | 8.07429  | 4.38048  | 2.33682 |
| 26 | C  | 7.33059  | 3.19144  | 2.33393 |
| 27 | C  | 5.88641  | 3.19337  | 2.34219 |
| 28 | C  | 5.14618  | 4.38436  | 2.35139 |
| 29 | C  | 11.90342 | 11.13452 | 2.34854 |
| 30 | C  | 13.09384 | 10.39340 | 2.34137 |
| 31 | C  | 13.09447 | 8.94920  | 2.33626 |
| 32 | C  | 11.90471 | 8.20645  | 2.33994 |
| 33 | N  | 6.61395  | 7.77021  | 2.35123 |
| 34 | N  | 4.23195  | 7.29211  | 2.34822 |
| 35 | N  | 8.99518  | 7.28841  | 2.34654 |
| 36 | N  | 8.51640  | 9.67020  | 2.35054 |
| 37 | N  | 8.99693  | 12.05163 | 2.34459 |
| 38 | N  | 6.61513  | 11.57390 | 2.34607 |
| 39 | N  | 4.23390  | 12.05526 | 2.34522 |
| 40 | N  | 4.71294  | 9.67348  | 2.34712 |
| 41 | Ni | 6.61478  | 9.67207  | 2.35017 |
| 42 | Co | 15.62421 | 9.67314  | 2.32667 |
| 43 | Co | 6.60469  | 0.66243  | 2.32360 |
| 44 | O  | 14.31016 | 8.41140  | 2.32761 |
| 45 | O  | 14.30873 | 10.93301 | 2.33751 |
| 46 | O  | 16.93865 | 10.93451 | 2.32976 |
| 47 | O  | 16.93917 | 8.41288  | 2.31995 |
| 48 | O  | 5.34590  | 1.97892  | 2.33866 |
| 49 | O  | 7.86747  | 1.97539  | 2.32321 |
| 50 | O  | 5.36114  | 17.36883 | 2.32834 |
| 51 | O  | 7.88271  | 17.36537 | 2.31349 |
| 52 | H  | 11.90592 | 12.22414 | 2.35169 |
| 53 | H  | 11.90891 | 7.11679  | 2.33593 |
| 54 | H  | 1.32142  | 12.22779 | 2.33943 |
| 55 | H  | 1.32204  | 7.12042  | 2.32419 |
| 56 | H  | 9.17218  | 14.96182 | 2.31676 |
| 57 | H  | 4.06488  | 14.96845 | 2.34085 |
| 58 | H  | 9.16391  | 4.37524  | 2.33030 |
| 59 | H  | 4.05654  | 4.38265  | 2.35679 |

CO<sub>2</sub>@NiPc-Co-O

|    | ATOM | X        | Y        | Z       |
|----|------|----------|----------|---------|
| 1  | C    | 5.54136  | 6.96550  | 2.40883 |
| 2  | C    | 5.94324  | 5.57473  | 2.42584 |
| 3  | C    | 7.35963  | 5.57332  | 2.42959 |
| 4  | C    | 7.76408  | 6.96372  | 2.41471 |
| 5  | C    | 9.38643  | 8.58390  | 2.41725 |
| 6  | C    | 10.77716 | 8.98680  | 2.43318 |
| 7  | C    | 10.77744 | 10.40314 | 2.42688 |
| 8  | C    | 9.38730  | 10.80683 | 2.40751 |
| 9  | C    | 7.76699  | 12.42893 | 2.40055 |
| 10 | C    | 7.36493  | 13.81972 | 2.41634 |
| 11 | C    | 5.94855  | 13.82097 | 2.41932 |
| 12 | C    | 5.54422  | 12.43054 | 2.40495 |
| 13 | C    | 3.92195  | 10.81032 | 2.41094 |
| 14 | C    | 2.53113  | 10.40727 | 2.42808 |
| 15 | C    | 2.53109  | 8.99096  | 2.42762 |
| 16 | C    | 3.92128  | 8.58744  | 2.41024 |
| 17 | C    | 5.19464  | 14.99006 | 2.43947 |
| 18 | C    | 5.93770  | 16.18030 | 2.45483 |
| 19 | C    | 7.38144  | 16.17870 | 2.45285 |
| 20 | C    | 8.12166  | 14.98694 | 2.43414 |
| 21 | C    | 1.36348  | 8.23497  | 2.44610 |
| 22 | C    | 0.17221  | 8.97597  | 2.46253 |
| 23 | C    | 0.17177  | 10.41972 | 2.46205 |
| 24 | C    | 1.36255  | 11.16201 | 2.44628 |
| 25 | C    | 8.11320  | 4.40405  | 2.44834 |
| 26 | C    | 7.36979  | 3.21401  | 2.46129 |
| 27 | C    | 5.92597  | 3.21587  | 2.45877 |
| 28 | C    | 5.18616  | 4.40787  | 2.44180 |
| 29 | C    | 11.94558 | 11.15864 | 2.44243 |
| 30 | C    | 13.13652 | 10.41733 | 2.46174 |
| 31 | C    | 13.13666 | 8.97363  | 2.46668 |
| 32 | C    | 11.94569 | 8.23181  | 2.45407 |
| 33 | C    | 6.86618  | 9.68782  | 5.68130 |
| 34 | N    | 6.65310  | 7.79474  | 2.39957 |
| 35 | N    | 4.27157  | 7.31726  | 2.41113 |
| 36 | N    | 9.03425  | 7.31409  | 2.42187 |
| 37 | N    | 8.55644  | 9.69573  | 2.40170 |
| 38 | N    | 9.03673  | 12.07701 | 2.40425 |
| 39 | N    | 6.65495  | 11.59965 | 2.39193 |
| 40 | N    | 4.27393  | 12.08011 | 2.41154 |
| 41 | N    | 4.75185  | 9.69845  | 2.40019 |
| 42 | Ni   | 6.65379  | 9.69707  | 2.38951 |

|    |    |          |          |         |
|----|----|----------|----------|---------|
| 43 | Co | 15.66904 | 9.69643  | 2.48318 |
| 44 | Co | 6.64397  | 0.68237  | 2.47734 |
| 45 | O  | 14.35231 | 8.43519  | 2.48185 |
| 46 | O  | 14.35177 | 10.95660 | 2.47459 |
| 47 | O  | 16.98590 | 10.95790 | 2.47575 |
| 48 | O  | 16.98697 | 8.43645  | 2.47765 |
| 49 | O  | 5.38536  | 2.00142  | 2.47156 |
| 50 | O  | 7.90666  | 1.99786  | 2.47473 |
| 51 | O  | 5.40048  | 17.39630 | 2.47093 |
| 52 | O  | 7.92174  | 17.39331 | 2.46868 |
| 53 | O  | 7.39275  | 8.63690  | 5.65044 |
| 54 | O  | 6.33939  | 10.73896 | 5.70237 |
| 55 | H  | 11.94882 | 12.24829 | 2.43982 |
| 56 | H  | 11.94938 | 7.14217  | 2.46007 |
| 57 | H  | 1.35851  | 12.25165 | 2.44828 |
| 58 | H  | 1.36095  | 7.14534  | 2.44798 |
| 59 | H  | 9.21134  | 14.98905 | 2.43457 |
| 60 | H  | 4.10501  | 14.99483 | 2.44402 |
| 61 | H  | 9.20289  | 4.39895  | 2.45258 |
| 62 | H  | 4.09646  | 4.40622  | 2.44129 |

COOH@*NiPc*-Co-O

|    | ATOM | X        | Y        | Z       |
|----|------|----------|----------|---------|
| 1  | C    | 5.53494  | 9.45970  | 6.28487 |
| 2  | C    | 5.94081  | 8.07424  | 6.28965 |
| 3  | C    | 7.34900  | 8.07064  | 6.27797 |
| 4  | C    | 7.76231  | 9.45338  | 6.26297 |
| 5  | C    | 9.38423  | 11.07220 | 6.23970 |
| 6  | C    | 10.76782 | 11.48392 | 6.25228 |
| 7  | C    | 10.76482 | 12.89216 | 6.25712 |
| 8  | C    | 9.37858  | 13.29766 | 6.24599 |
| 9  | C    | 7.75440  | 14.92347 | 6.24294 |
| 10 | C    | 7.34989  | 16.31006 | 6.25054 |
| 11 | C    | 5.94169  | 16.31413 | 6.24112 |
| 12 | C    | 5.52893  | 14.93104 | 6.22907 |
| 13 | C    | 3.90854  | 13.31088 | 6.24721 |
| 14 | C    | 2.52534  | 12.89954 | 6.26122 |
| 15 | C    | 2.52713  | 11.49141 | 6.27752 |
| 16 | C    | 3.91221  | 11.08386 | 6.27665 |
| 17 | C    | 5.19152  | 17.49177 | 6.22920 |
| 18 | C    | 5.91320  | 0.64886  | 6.23123 |
| 19 | C    | 7.34948  | 0.64573  | 6.23694 |
| 20 | C    | 8.10443  | 17.48541 | 6.24436 |
| 21 | C    | 1.35071  | 10.73844 | 6.26635 |

|    |    |          |          |         |
|----|----|----------|----------|---------|
| 22 | C  | 0.16204  | 11.47617 | 6.25031 |
| 23 | C  | 0.16097  | 12.91265 | 6.24035 |
| 24 | C  | 1.34862  | 13.65139 | 6.23977 |
| 25 | C  | 8.09884  | 6.89259  | 6.25738 |
| 26 | C  | 7.35811  | 5.70611  | 6.25265 |
| 27 | C  | 5.92163  | 5.70922  | 6.25785 |
| 28 | C  | 5.18596  | 6.89910  | 6.27453 |
| 29 | C  | 11.94056 | 13.64617 | 6.24934 |
| 30 | C  | 13.12998 | 12.90942 | 6.24413 |
| 31 | C  | 13.13210 | 11.47315 | 6.24299 |
| 32 | C  | 11.94511 | 10.73311 | 6.24338 |
| 33 | C  | 6.66361  | 12.21926 | 8.36387 |
| 34 | N  | 6.65084  | 10.28616 | 6.23985 |
| 35 | N  | 4.26578  | 9.81454  | 6.30483 |
| 36 | N  | 9.03373  | 9.80141  | 6.26479 |
| 37 | N  | 8.55293  | 12.18257 | 6.20019 |
| 38 | N  | 9.02353  | 14.56726 | 6.26976 |
| 39 | N  | 6.63861  | 14.09865 | 6.19611 |
| 40 | N  | 4.25781  | 14.58190 | 6.24893 |
| 41 | N  | 4.74005  | 12.19862 | 6.22765 |
| 42 | Ni | 6.64455  | 12.19114 | 6.34433 |
| 43 | Co | 15.66108 | 12.19368 | 6.24105 |
| 44 | Co | 6.63540  | 3.17754  | 6.23883 |
| 45 | O  | 14.35047 | 10.91776 | 6.24560 |
| 46 | O  | 14.34736 | 13.46752 | 6.24482 |
| 47 | O  | 16.97290 | 13.46902 | 6.23569 |
| 48 | O  | 16.97425 | 10.91903 | 6.24895 |
| 49 | O  | 5.36257  | 4.49258  | 6.24974 |
| 50 | O  | 7.91255  | 4.48744  | 6.24523 |
| 51 | O  | 5.35854  | 1.86755  | 6.23319 |
| 52 | O  | 7.90821  | 1.86274  | 6.24068 |
| 53 | O  | 7.43466  | 12.97570 | 8.87988 |
| 54 | O  | 5.78978  | 11.36736 | 8.79517 |
| 55 | H  | 11.94320 | 14.73599 | 6.25090 |
| 56 | H  | 11.95032 | 9.64330  | 6.24064 |
| 57 | H  | 1.34433  | 14.74112 | 6.22768 |
| 58 | H  | 1.34714  | 9.64863  | 6.27209 |
| 59 | H  | 9.19423  | 17.48739 | 6.24963 |
| 60 | H  | 4.10177  | 17.49732 | 6.22343 |
| 61 | H  | 9.18857  | 6.88641  | 6.24799 |
| 62 | H  | 4.09615  | 6.89746  | 6.27618 |
| 63 | H  | 5.75820  | 11.34568 | 9.79294 |

CO@NiPc-Co-O

|    | ATOM | X        | Y        | Z       |
|----|------|----------|----------|---------|
| 1  | C    | 5.51303  | 6.95288  | 3.09599 |
| 2  | C    | 5.91535  | 5.56248  | 3.10437 |
| 3  | C    | 7.33164  | 5.56130  | 3.11794 |
| 4  | C    | 7.73587  | 6.95125  | 3.11558 |
| 5  | C    | 9.35855  | 8.57173  | 3.11727 |
| 6  | C    | 10.74896 | 8.97484  | 3.12165 |
| 7  | C    | 10.74885 | 10.39118 | 3.10726 |
| 8  | C    | 9.35883  | 10.79462 | 3.09694 |
| 9  | C    | 7.73842  | 12.41653 | 3.08045 |
| 10 | C    | 7.33673  | 13.80725 | 3.07855 |
| 11 | C    | 5.92042  | 13.80888 | 3.07171 |
| 12 | C    | 5.51579  | 12.41837 | 3.07077 |
| 13 | C    | 3.89375  | 10.79784 | 3.07240 |
| 14 | C    | 2.50292  | 10.39498 | 3.07578 |
| 15 | C    | 2.50261  | 8.97860  | 3.08313 |
| 16 | C    | 3.89284  | 8.57506  | 3.08264 |
| 17 | C    | 5.16738  | 14.97852 | 3.07006 |
| 18 | C    | 5.91110  | 16.16852 | 3.07980 |
| 19 | C    | 7.35463  | 16.16633 | 3.08848 |
| 20 | C    | 8.09403  | 14.97404 | 3.08559 |
| 21 | C    | 1.33455  | 8.22333  | 3.09206 |
| 22 | C    | 0.14340  | 8.96476  | 3.09583 |
| 23 | C    | 0.14331  | 10.40832 | 3.08643 |
| 24 | C    | 1.33459  | 11.14996 | 3.07527 |
| 25 | C    | 8.08561  | 4.39202  | 3.12497 |
| 26 | C    | 7.34298  | 3.20169  | 3.11733 |
| 27 | C    | 5.89956  | 3.20318  | 3.10414 |
| 28 | C    | 5.15913  | 4.39480  | 3.09740 |
| 29 | C    | 11.91673 | 11.14696 | 3.10084 |
| 30 | C    | 13.10822 | 10.40625 | 3.10941 |
| 31 | C    | 13.10882 | 8.96274  | 3.12375 |
| 32 | C    | 11.91797 | 8.22053  | 3.13050 |
| 33 | C    | 6.80601  | 9.48698  | 6.13162 |
| 34 | N    | 6.62495  | 7.78198  | 3.09890 |
| 35 | N    | 4.24315  | 7.30479  | 3.08966 |
| 36 | N    | 9.00618  | 7.30192  | 3.12700 |
| 37 | N    | 8.52887  | 9.68349  | 3.09957 |
| 38 | N    | 9.00818  | 12.06477 | 3.08860 |
| 39 | N    | 6.62640  | 11.58795 | 3.07536 |
| 40 | N    | 4.24535  | 12.06796 | 3.06929 |
| 41 | N    | 4.72289  | 9.68616  | 3.07630 |
| 42 | Ni   | 6.62563  | 9.68527  | 3.09192 |
| 43 | Co   | 15.64079 | 9.68596  | 3.10710 |

|    |    |          |          |         |
|----|----|----------|----------|---------|
| 44 | Co | 6.61834  | 0.67024  | 3.09953 |
| 45 | O  | 14.32452 | 8.42450  | 3.12607 |
| 46 | O  | 14.32311 | 10.94612 | 3.10192 |
| 47 | O  | 16.95778 | 10.94721 | 3.08945 |
| 48 | O  | 16.95812 | 8.42556  | 3.10764 |
| 49 | O  | 5.35925  | 1.98850  | 3.09623 |
| 50 | O  | 7.88064  | 1.98569  | 3.11817 |
| 51 | O  | 5.37430  | 17.38463 | 3.08241 |
| 52 | O  | 7.89576  | 17.38061 | 3.09909 |
| 53 | O  | 7.55679  | 8.70141  | 6.49081 |
| 54 | H  | 11.91886 | 12.23658 | 3.08661 |
| 55 | H  | 11.92184 | 7.13087  | 3.13865 |
| 56 | H  | 1.33128  | 12.23961 | 3.06711 |
| 57 | H  | 1.33173  | 7.13366  | 3.09650 |
| 58 | H  | 9.18369  | 14.97482 | 3.08944 |
| 59 | H  | 4.07774  | 14.98363 | 3.06224 |
| 60 | H  | 9.17527  | 4.38806  | 3.13266 |
| 61 | H  | 4.06947  | 4.39288  | 3.08436 |

CO<sub>2</sub>@NiPc-*Co-O*

|    | ATOM | X        | Y        | Z       |
|----|------|----------|----------|---------|
| 1  | C    | 5.54371  | 6.96416  | 2.48951 |
| 2  | C    | 5.94570  | 5.57351  | 2.50249 |
| 3  | C    | 7.36229  | 5.57204  | 2.50267 |
| 4  | C    | 7.76690  | 6.96235  | 2.48963 |
| 5  | C    | 9.38922  | 8.58208  | 2.45660 |
| 6  | C    | 10.77984 | 8.98492  | 2.42072 |
| 7  | C    | 10.77989 | 10.40179 | 2.41929 |
| 8  | C    | 9.38970  | 10.80511 | 2.45478 |
| 9  | C    | 7.76911  | 12.42659 | 2.48581 |
| 10 | C    | 7.36702  | 13.81733 | 2.49767 |
| 11 | C    | 5.95039  | 13.81876 | 2.49674 |
| 12 | C    | 5.54590  | 12.42844 | 2.48459 |
| 13 | C    | 3.92369  | 10.80853 | 2.45306 |
| 14 | C    | 2.53313  | 10.40553 | 2.41702 |
| 15 | C    | 2.53310  | 8.98867  | 2.41921 |
| 16 | C    | 3.92319  | 8.58546  | 2.45596 |
| 17 | C    | 5.19691  | 14.98822 | 2.49828 |
| 18 | C    | 5.94007  | 16.17860 | 2.50140 |
| 19 | C    | 7.38363  | 16.17679 | 2.50232 |
| 20 | C    | 8.12362  | 14.98466 | 2.50026 |
| 21 | C    | 1.36575  | 8.23327  | 2.38329 |
| 22 | C    | 0.17458  | 8.97418  | 2.33958 |
| 23 | C    | 0.17424  | 10.41785 | 2.33710 |

|    |    |          |          |         |
|----|----|----------|----------|---------|
| 24 | C  | 1.36503  | 11.15986 | 2.37847 |
| 25 | C  | 8.11568  | 4.40257  | 2.50479 |
| 26 | C  | 7.37233  | 3.21226  | 2.50645 |
| 27 | C  | 5.92873  | 3.21416  | 2.50606 |
| 28 | C  | 5.18888  | 4.40638  | 2.50418 |
| 29 | C  | 11.94748 | 11.15693 | 2.38154 |
| 30 | C  | 13.13860 | 10.41580 | 2.33999 |
| 31 | C  | 13.13888 | 8.97214  | 2.34199 |
| 32 | C  | 11.94799 | 8.23040  | 2.38498 |
| 33 | C  | 15.71637 | 9.71964  | 5.56150 |
| 34 | N  | 6.65578  | 7.79362  | 2.48548 |
| 35 | N  | 4.27359  | 7.31520  | 2.47251 |
| 36 | N  | 9.03751  | 7.31203  | 2.47277 |
| 37 | N  | 8.55914  | 9.69387  | 2.46964 |
| 38 | N  | 9.03923  | 12.07539 | 2.46942 |
| 39 | N  | 6.65687  | 11.59717 | 2.48214 |
| 40 | N  | 4.27531  | 12.07858 | 2.46727 |
| 41 | N  | 4.75365  | 9.69666  | 2.46890 |
| 42 | Ni | 6.65616  | 9.69529  | 2.47875 |
| 43 | Co | 15.67133 | 9.69483  | 2.27699 |
| 44 | Co | 6.64664  | 0.68065  | 2.50390 |
| 45 | O  | 14.35370 | 8.43459  | 2.30153 |
| 46 | O  | 14.35299 | 10.95411 | 2.29759 |
| 47 | O  | 16.98918 | 10.95522 | 2.29517 |
| 48 | O  | 16.98996 | 8.43570  | 2.29960 |
| 49 | O  | 5.38825  | 1.99971  | 2.50516 |
| 50 | O  | 7.90922  | 1.99617  | 2.50597 |
| 51 | O  | 5.40311  | 17.39470 | 2.50201 |
| 52 | O  | 7.92407  | 17.39134 | 2.50345 |
| 53 | O  | 16.89239 | 9.72137  | 5.55209 |
| 54 | O  | 14.54024 | 9.71795  | 5.56973 |
| 55 | H  | 11.94993 | 12.24668 | 2.38059 |
| 56 | H  | 11.95124 | 7.14064  | 2.38661 |
| 57 | H  | 1.36174  | 12.24962 | 2.37725 |
| 58 | H  | 1.36364  | 7.14352  | 2.38575 |
| 59 | H  | 9.21335  | 14.98637 | 2.49869 |
| 60 | H  | 4.10719  | 14.99304 | 2.49513 |
| 61 | H  | 9.20540  | 4.39773  | 2.50252 |
| 62 | H  | 4.09916  | 4.40496  | 2.50137 |

COOH@NiPc-*Co-O*

|   | ATOM | X       | Y       | Z       |
|---|------|---------|---------|---------|
| 1 | C    | 5.54282 | 6.96423 | 2.47000 |
| 2 | C    | 5.94454 | 5.57398 | 2.47936 |

|    |    |          |          |         |
|----|----|----------|----------|---------|
| 3  | C  | 7.36161  | 5.57247  | 2.47969 |
| 4  | C  | 7.76605  | 6.96230  | 2.47090 |
| 5  | C  | 9.38894  | 8.58207  | 2.46066 |
| 6  | C  | 10.77959 | 8.98337  | 2.46291 |
| 7  | C  | 10.77962 | 10.40666 | 2.45751 |
| 8  | C  | 9.38939  | 10.80834 | 2.45409 |
| 9  | C  | 7.76830  | 12.42991 | 2.46182 |
| 10 | C  | 7.36643  | 13.82017 | 2.47062 |
| 11 | C  | 5.94935  | 13.82157 | 2.47133 |
| 12 | C  | 5.54508  | 12.43171 | 2.46215 |
| 13 | C  | 3.92237  | 10.81192 | 2.44984 |
| 14 | C  | 2.53179  | 10.41054 | 2.44276 |
| 15 | C  | 2.53176  | 8.98729  | 2.44762 |
| 16 | C  | 3.92188  | 8.58558  | 2.45548 |
| 17 | C  | 5.19556  | 14.99099 | 2.47910 |
| 18 | C  | 5.93857  | 16.18065 | 2.48582 |
| 19 | C  | 7.38308  | 16.17892 | 2.48505 |
| 20 | C  | 8.12312  | 14.98766 | 2.47745 |
| 21 | C  | 1.36962  | 8.23239  | 2.45483 |
| 22 | C  | 0.16990  | 8.97016  | 2.46906 |
| 23 | C  | 0.16953  | 10.42587 | 2.46276 |
| 24 | C  | 1.36887  | 11.16454 | 2.44334 |
| 25 | C  | 8.11508  | 4.40283  | 2.48554 |
| 26 | C  | 7.37171  | 3.21339  | 2.49051 |
| 27 | C  | 5.92717  | 3.21535  | 2.49034 |
| 28 | C  | 5.18746  | 4.40687  | 2.48495 |
| 29 | C  | 11.94205 | 11.16203 | 2.47161 |
| 30 | C  | 13.13984 | 10.42283 | 2.50239 |
| 31 | C  | 13.14016 | 8.96911  | 2.50891 |
| 32 | C  | 11.94261 | 8.22890  | 2.48395 |
| 33 | C  | 15.79658 | 9.70728  | 4.55446 |
| 34 | N  | 6.65488  | 7.79303  | 2.46568 |
| 35 | N  | 4.27286  | 7.31563  | 2.46439 |
| 36 | N  | 9.03651  | 7.31232  | 2.46800 |
| 37 | N  | 8.55998  | 9.69545  | 2.45594 |
| 38 | N  | 9.03823  | 12.07834 | 2.45727 |
| 39 | N  | 6.65600  | 11.60103 | 2.45891 |
| 40 | N  | 4.27462  | 12.08165 | 2.45549 |
| 41 | N  | 4.75120  | 9.69839  | 2.45477 |
| 42 | Ni | 6.65532  | 9.69691  | 2.45819 |
| 43 | Co | 15.67405 | 9.69767  | 2.64911 |
| 44 | Co | 6.64544  | 0.68226  | 2.49470 |
| 45 | O  | 14.34259 | 8.43215  | 2.53063 |
| 46 | O  | 14.34184 | 10.96093 | 2.51890 |

|    |   |          |          |         |
|----|---|----------|----------|---------|
| 47 | O | 16.99941 | 10.96581 | 2.45057 |
| 48 | O | 17.00026 | 8.42906  | 2.46221 |
| 49 | O | 5.38703  | 2.00045  | 2.49416 |
| 50 | O | 7.90810  | 1.99676  | 2.49418 |
| 51 | O | 5.40194  | 17.39717 | 2.49223 |
| 52 | O | 7.92301  | 17.39400 | 2.49106 |
| 53 | O | 16.86848 | 9.71188  | 5.12911 |
| 54 | O | 14.58873 | 9.70823  | 5.12151 |
| 55 | H | 11.94314 | 12.25174 | 2.46782 |
| 56 | H | 11.94451 | 7.13919  | 2.48962 |
| 57 | H | 1.36705  | 12.25428 | 2.43843 |
| 58 | H | 1.36904  | 7.14266  | 2.45887 |
| 59 | H | 9.21303  | 14.98968 | 2.47665 |
| 60 | H | 4.10565  | 14.99587 | 2.47967 |
| 61 | H | 9.20500  | 4.39770  | 2.48525 |
| 62 | H | 4.09754  | 4.40534  | 2.48424 |
| 63 | H | 14.67804 | 9.71339  | 6.10527 |

CO@NiPc-*Co-O*

|    | ATOM | X        | Y        | Z       |
|----|------|----------|----------|---------|
| 1  | C    | 5.49878  | 6.93783  | 2.29268 |
| 2  | C    | 5.90060  | 5.54798  | 2.30723 |
| 3  | C    | 7.31681  | 5.54674  | 2.30561 |
| 4  | C    | 7.72080  | 6.93607  | 2.28915 |
| 5  | C    | 9.34243  | 8.55575  | 2.27905 |
| 6  | C    | 10.73207 | 8.95744  | 2.29870 |
| 7  | C    | 10.73182 | 10.37633 | 2.30383 |
| 8  | C    | 9.34266  | 10.77825 | 2.28444 |
| 9  | C    | 7.72307  | 12.39949 | 2.29371 |
| 10 | C    | 7.32153  | 13.78920 | 2.30905 |
| 11 | C    | 5.90558  | 13.79093 | 2.31079 |
| 12 | C    | 5.50109  | 12.40152 | 2.29734 |
| 13 | C    | 3.87998  | 10.78182 | 2.29504 |
| 14 | C    | 2.49038  | 10.38023 | 2.31734 |
| 15 | C    | 2.49002  | 8.96140  | 2.31199 |
| 16 | C    | 3.87920  | 8.55928  | 2.28942 |
| 17 | C    | 5.15267  | 14.96057 | 2.32667 |
| 18 | C    | 5.89633  | 16.14942 | 2.34042 |
| 19 | C    | 7.34006  | 16.14719 | 2.33953 |
| 20 | C    | 8.07892  | 14.95582 | 2.32400 |
| 21 | C    | 1.32635  | 8.20740  | 2.36401 |
| 22 | C    | 0.13223  | 8.94649  | 2.41235 |
| 23 | C    | 0.13243  | 10.39456 | 2.41921 |
| 24 | C    | 1.32684  | 11.13395 | 2.37637 |

|    |    |          |          |         |
|----|----|----------|----------|---------|
| 25 | C  | 8.07116  | 4.37781  | 2.32221 |
| 26 | C  | 7.32842  | 3.18866  | 2.33883 |
| 27 | C  | 5.88450  | 3.19020  | 2.33953 |
| 28 | C  | 5.14395  | 4.38066  | 2.32446 |
| 29 | C  | 11.89467 | 11.13106 | 2.36396 |
| 30 | C  | 13.08924 | 10.39247 | 2.40995 |
| 31 | C  | 13.09010 | 8.94425  | 2.40337 |
| 32 | C  | 11.89644 | 8.20415  | 2.35211 |
| 33 | C  | 15.62159 | 9.65706  | 4.51243 |
| 34 | N  | 6.61041  | 7.76777  | 2.28342 |
| 35 | N  | 4.22879  | 7.28892  | 2.29276 |
| 36 | N  | 8.99132  | 7.28563  | 2.28457 |
| 37 | N  | 8.51360  | 9.66737  | 2.27364 |
| 38 | N  | 8.99297  | 12.04854 | 2.29134 |
| 39 | N  | 6.61155  | 11.56982 | 2.28745 |
| 40 | N  | 4.23069  | 12.05191 | 2.29979 |
| 41 | N  | 4.70863  | 9.67030  | 2.28207 |
| 42 | Ni | 6.61119  | 9.66891  | 2.27792 |
| 43 | Co | 15.62005 | 9.66867  | 2.77827 |
| 44 | Co | 6.60354  | 0.65919  | 2.35933 |
| 45 | O  | 14.29077 | 8.39441  | 2.46408 |
| 46 | O  | 14.28892 | 10.94381 | 2.47687 |
| 47 | O  | 16.95131 | 10.94532 | 2.48210 |
| 48 | O  | 16.95107 | 8.39526  | 2.46873 |
| 49 | O  | 5.34375  | 1.97543  | 2.35326 |
| 50 | O  | 7.86668  | 1.97270  | 2.35258 |
| 51 | O  | 5.35894  | 17.36571 | 2.35356 |
| 52 | O  | 7.88229  | 17.36140 | 2.35265 |
| 53 | O  | 15.62543 | 9.64946  | 5.66757 |
| 54 | H  | 11.89668 | 12.22049 | 2.38314 |
| 55 | H  | 11.90061 | 7.11462  | 2.36218 |
| 56 | H  | 1.32336  | 12.22327 | 2.39538 |
| 57 | H  | 1.32286  | 7.11796  | 2.37352 |
| 58 | H  | 9.16843  | 14.95576 | 2.32415 |
| 59 | H  | 4.06306  | 14.96504 | 2.32832 |
| 60 | H  | 9.16085  | 4.37458  | 2.32301 |
| 61 | H  | 4.05419  | 4.37962  | 2.32652 |

NiPc-Ni-O

|   | ATOM | X       | Y       | Z       |
|---|------|---------|---------|---------|
| 1 | C    | 5.50103 | 6.93941 | 2.35191 |
| 2 | C    | 5.90201 | 5.54903 | 2.35132 |
| 3 | C    | 7.32182 | 5.54750 | 2.34590 |
| 4 | C    | 7.72547 | 6.93738 | 2.34802 |

|    |    |          |          |         |
|----|----|----------|----------|---------|
| 5  | C  | 9.34788  | 8.55764  | 2.34836 |
| 6  | C  | 10.73829 | 8.95988  | 2.34670 |
| 7  | C  | 10.73813 | 10.37973 | 2.34965 |
| 8  | C  | 9.34822  | 10.78216 | 2.34969 |
| 9  | C  | 7.72792  | 12.40458 | 2.34109 |
| 10 | C  | 7.32691  | 13.79500 | 2.33294 |
| 11 | C  | 5.90707  | 13.79652 | 2.33774 |
| 12 | C  | 5.50346  | 12.40656 | 2.34424 |
| 13 | C  | 3.88143  | 10.78599 | 2.34483 |
| 14 | C  | 2.49110  | 10.38407 | 2.33924 |
| 15 | C  | 2.49090  | 8.96427  | 2.33652 |
| 16 | C  | 3.88075  | 8.56159  | 2.34399 |
| 17 | C  | 5.15356  | 14.96270 | 2.33563 |
| 18 | C  | 5.89625  | 16.15781 | 2.32813 |
| 19 | C  | 7.34419  | 16.15590 | 2.32050 |
| 20 | C  | 8.08356  | 14.95897 | 2.32258 |
| 21 | C  | 1.32609  | 8.20901  | 2.32817 |
| 22 | C  | 0.13020  | 8.94998  | 2.32546 |
| 23 | C  | 0.13004  | 10.39794 | 2.33037 |
| 24 | C  | 1.32596  | 11.13912 | 2.33629 |
| 25 | C  | 8.07529  | 4.38137  | 2.33683 |
| 26 | C  | 7.33250  | 3.18643  | 2.33392 |
| 27 | C  | 5.88456  | 3.18828  | 2.34202 |
| 28 | C  | 5.14518  | 4.38515  | 2.35121 |
| 29 | C  | 11.90259 | 11.13554 | 2.34832 |
| 30 | C  | 13.09891 | 10.39535 | 2.34127 |
| 31 | C  | 13.09957 | 8.94736  | 2.33626 |
| 32 | C  | 11.90389 | 8.20550  | 2.33993 |
| 33 | N  | 6.61390  | 7.76925  | 2.35126 |
| 34 | N  | 4.23115  | 7.29131  | 2.34816 |
| 35 | N  | 8.99591  | 7.28765  | 2.34647 |
| 36 | N  | 8.51734  | 9.67022  | 2.35050 |
| 37 | N  | 8.99768  | 12.05242 | 2.34457 |
| 38 | N  | 6.61510  | 11.57485 | 2.34609 |
| 39 | N  | 4.23311  | 12.05603 | 2.34521 |
| 40 | N  | 4.71195  | 9.67344  | 2.34717 |
| 41 | Ni | 6.61476  | 9.67208  | 2.35019 |
| 42 | Ni | 15.62427 | 9.67325  | 2.32719 |
| 43 | Ni | 6.60490  | 0.66244  | 2.32412 |
| 44 | O  | 14.30713 | 8.40803  | 2.32771 |
| 45 | O  | 14.30569 | 10.93646 | 2.33739 |
| 46 | O  | 16.94176 | 10.93796 | 2.32959 |
| 47 | O  | 16.94222 | 8.40949  | 2.32012 |
| 48 | O  | 5.34262  | 1.98193  | 2.33832 |

|    |   |          |          |         |
|----|---|----------|----------|---------|
| 49 | O | 7.87101  | 1.97854  | 2.32328 |
| 50 | O | 5.35787  | 17.36585 | 2.32828 |
| 51 | O | 7.88625  | 17.36226 | 2.31370 |
| 52 | H | 11.90470 | 12.22526 | 2.35138 |
| 53 | H | 11.90771 | 7.11571  | 2.33609 |
| 54 | H | 1.32270  | 12.22887 | 2.33940 |
| 55 | H | 1.32326  | 7.11927  | 2.32450 |
| 56 | H | 9.17331  | 14.96045 | 2.31707 |
| 57 | H | 4.06379  | 14.96723 | 2.34072 |
| 58 | H | 9.16498  | 4.37659  | 2.33043 |
| 59 | H | 4.05541  | 4.38384  | 2.35652 |

CO<sub>2</sub>@*NiPc*-Ni-O

|    | ATOM | X        | Y        | Z       |
|----|------|----------|----------|---------|
| 1  | C    | 5.50203  | 6.93628  | 2.26439 |
| 2  | C    | 5.90331  | 5.54582  | 2.27225 |
| 3  | C    | 7.32337  | 5.54455  | 2.27746 |
| 4  | C    | 7.72682  | 6.93467  | 2.27184 |
| 5  | C    | 9.34956  | 8.55482  | 2.27763 |
| 6  | C    | 10.74009 | 8.95715  | 2.28608 |
| 7  | C    | 10.73994 | 10.37725 | 2.28383 |
| 8  | C    | 9.34993  | 10.77967 | 2.27482 |
| 9  | C    | 7.72951  | 12.40215 | 2.27393 |
| 10 | C    | 7.32836  | 13.79266 | 2.28319 |
| 11 | C    | 5.90823  | 13.79431 | 2.28586 |
| 12 | C    | 5.50466  | 12.40415 | 2.27842 |
| 13 | C    | 3.88260  | 10.78340 | 2.27869 |
| 14 | C    | 2.49220  | 10.38145 | 2.28572 |
| 15 | C    | 2.49178  | 8.96145  | 2.27993 |
| 16 | C    | 3.88164  | 8.55858  | 2.26938 |
| 17 | C    | 5.15508  | 14.96073 | 2.29614 |
| 18 | C    | 5.89840  | 16.15561 | 2.30543 |
| 19 | C    | 7.34626  | 16.15347 | 2.30435 |
| 20 | C    | 8.08541  | 14.95628 | 2.29214 |
| 21 | C    | 1.32668  | 8.20646  | 2.28899 |
| 22 | C    | 0.13116  | 8.94788  | 2.30457 |
| 23 | C    | 0.13128  | 10.39568 | 2.30816 |
| 24 | C    | 1.32726  | 11.13671 | 2.29888 |
| 25 | C    | 8.07715  | 4.37867  | 2.29065 |
| 26 | C    | 7.33446  | 3.18356  | 2.30062 |
| 27 | C    | 5.88660  | 3.18518  | 2.29661 |
| 28 | C    | 5.14676  | 4.38191  | 2.28079 |
| 29 | C    | 11.90429 | 11.13319 | 2.29340 |
| 30 | C    | 13.10060 | 10.39305 | 2.30662 |

|    |    |          |          |         |
|----|----|----------|----------|---------|
| 31 | C  | 13.10135 | 8.94521  | 2.30812 |
| 32 | C  | 11.90587 | 8.20302  | 2.29771 |
| 33 | C  | 6.43668  | 9.68093  | 5.55693 |
| 34 | N  | 6.61498  | 7.76611  | 2.26353 |
| 35 | N  | 4.23219  | 7.28837  | 2.26493 |
| 36 | N  | 8.99718  | 7.28494  | 2.27777 |
| 37 | N  | 8.51902  | 9.66754  | 2.27155 |
| 38 | N  | 8.99921  | 12.04987 | 2.27449 |
| 39 | N  | 6.61659  | 11.57252 | 2.27025 |
| 40 | N  | 4.23451  | 12.05335 | 2.28257 |
| 41 | N  | 4.71308  | 9.67059  | 2.26962 |
| 42 | Ni | 6.61612  | 9.66929  | 2.26334 |
| 43 | Ni | 15.62569 | 9.67134  | 2.32308 |
| 44 | Ni | 6.60744  | 0.65982  | 2.31694 |
| 45 | O  | 14.30900 | 8.40626  | 2.31971 |
| 46 | O  | 14.30719 | 10.93437 | 2.31866 |
| 47 | O  | 16.94304 | 10.93564 | 2.32119 |
| 48 | O  | 16.94322 | 8.40751  | 2.31669 |
| 49 | O  | 5.34505  | 1.97883  | 2.30899 |
| 50 | O  | 7.87330  | 1.97597  | 2.31448 |
| 51 | O  | 5.36029  | 17.36357 | 2.31495 |
| 52 | O  | 7.88848  | 17.35960 | 2.31476 |
| 53 | O  | 7.09006  | 8.70336  | 5.57474 |
| 54 | O  | 5.78342  | 10.65832 | 5.53015 |
| 55 | H  | 11.90521 | 12.22291 | 2.29170 |
| 56 | H  | 11.90949 | 7.11335  | 2.29969 |
| 57 | H  | 1.32485  | 12.22640 | 2.30268 |
| 58 | H  | 1.32432  | 7.11682  | 2.28567 |
| 59 | H  | 9.17507  | 14.95658 | 2.29025 |
| 60 | H  | 4.06546  | 14.96491 | 2.29716 |
| 61 | H  | 9.16673  | 4.37509  | 2.29452 |
| 62 | H  | 4.05705  | 4.38084  | 2.27713 |

COOH@*NiPc*-Ni-O

|   | ATOM | X        | Y        | Z       |
|---|------|----------|----------|---------|
| 1 | C    | 5.49244  | 6.94203  | 2.37998 |
| 2 | C    | 5.89767  | 5.55678  | 2.40298 |
| 3 | C    | 7.31379  | 5.55405  | 2.39911 |
| 4 | C    | 7.72515  | 6.93664  | 2.37233 |
| 5 | C    | 9.34797  | 8.55576  | 2.32746 |
| 6 | C    | 10.73212 | 8.96538  | 2.32963 |
| 7 | C    | 10.72920 | 10.38162 | 2.33844 |
| 8 | C    | 9.34271  | 10.78513 | 2.33958 |
| 9 | C    | 7.71815  | 12.41176 | 2.35910 |

|    |    |          |          |         |
|----|----|----------|----------|---------|
| 10 | C  | 7.31543  | 13.79836 | 2.37398 |
| 11 | C  | 5.89953  | 13.80339 | 2.34456 |
| 12 | C  | 5.48770  | 12.42013 | 2.31673 |
| 13 | C  | 3.86668  | 10.79843 | 2.29218 |
| 14 | C  | 2.48307  | 10.38889 | 2.29211 |
| 15 | C  | 2.48452  | 8.97287  | 2.31435 |
| 16 | C  | 3.86956  | 8.56707  | 2.32816 |
| 17 | C  | 5.15003  | 14.97578 | 2.32932 |
| 18 | C  | 5.89295  | 16.16714 | 2.35036 |
| 19 | C  | 7.33727  | 16.16267 | 2.37390 |
| 20 | C  | 8.07256  | 14.96620 | 2.38464 |
| 21 | C  | 1.31483  | 8.21880  | 2.30553 |
| 22 | C  | 0.12072  | 8.95764  | 2.28877 |
| 23 | C  | 0.11988  | 10.40235 | 2.27301 |
| 24 | C  | 1.31314  | 11.14190 | 2.26569 |
| 25 | C  | 8.06638  | 4.38339  | 2.39192 |
| 26 | C  | 7.32637  | 3.19050  | 2.39209 |
| 27 | C  | 5.88179  | 3.19231  | 2.38944 |
| 28 | C  | 5.14344  | 4.38687  | 2.39436 |
| 29 | C  | 11.89800 | 11.13672 | 2.32225 |
| 30 | C  | 13.09327 | 10.39950 | 2.30682 |
| 31 | C  | 13.09546 | 8.95498  | 2.30402 |
| 32 | C  | 11.90277 | 8.21395  | 2.30966 |
| 33 | C  | 6.60247  | 9.69652  | 4.45318 |
| 34 | N  | 6.61104  | 7.76701  | 2.34183 |
| 35 | N  | 4.22431  | 7.29895  | 2.37402 |
| 36 | N  | 8.99546  | 7.28650  | 2.36408 |
| 37 | N  | 8.51916  | 9.66848  | 2.28975 |
| 38 | N  | 8.98615  | 12.05342 | 2.37907 |
| 39 | N  | 6.60012  | 11.58926 | 2.30026 |
| 40 | N  | 4.21779  | 12.06853 | 2.30686 |
| 41 | N  | 4.69604  | 9.68367  | 2.27980 |
| 42 | Ni | 6.60396  | 9.67656  | 2.43002 |
| 43 | Ni | 15.61691 | 9.67970  | 2.28860 |
| 44 | Ni | 6.60231  | 0.66850  | 2.37902 |
| 45 | O  | 14.30375 | 8.40804  | 2.29901 |
| 46 | O  | 14.30043 | 10.94941 | 2.29834 |
| 47 | O  | 16.93098 | 10.95054 | 2.27355 |
| 48 | O  | 16.93204 | 8.40911  | 2.29508 |
| 49 | O  | 5.33266  | 1.98465  | 2.38373 |
| 50 | O  | 7.87392  | 1.98198  | 2.39452 |
| 51 | O  | 5.34814  | 17.37665 | 2.35380 |
| 52 | O  | 7.88908  | 17.36924 | 2.38891 |
| 53 | O  | 7.42276  | 10.39199 | 4.97907 |

|    |   |          |          |         |
|----|---|----------|----------|---------|
| 54 | O | 5.66298  | 8.91153  | 4.87398 |
| 55 | H | 11.89918 | 12.22648 | 2.32382 |
| 56 | H | 11.90733 | 7.12432  | 2.30159 |
| 57 | H | 1.31050  | 12.23161 | 2.24867 |
| 58 | H | 1.31218  | 7.12904  | 2.31786 |
| 59 | H | 9.16224  | 14.96540 | 2.40422 |
| 60 | H | 4.06038  | 14.98241 | 2.30682 |
| 61 | H | 9.15615  | 4.38015  | 2.38700 |
| 62 | H | 4.05362  | 4.38418  | 2.39143 |
| 63 | H | 5.61702  | 8.89465  | 5.87133 |

CO<sub>2</sub>@NiPc-*Ni-O*

|    | ATOM | X        | Y        | Z       |
|----|------|----------|----------|---------|
| 1  | C    | 5.50119  | 6.94023  | 2.35325 |
| 2  | C    | 5.90256  | 5.54945  | 2.35995 |
| 3  | C    | 7.32244  | 5.54819  | 2.35961 |
| 4  | C    | 7.72611  | 6.93853  | 2.35299 |
| 5  | C    | 9.34946  | 8.55847  | 2.32226 |
| 6  | C    | 10.74000 | 8.96084  | 2.28368 |
| 7  | C    | 10.73981 | 10.38046 | 2.28229 |
| 8  | C    | 9.34969  | 10.78286 | 2.32036 |
| 9  | C    | 7.72843  | 12.40489 | 2.34876 |
| 10 | C    | 7.32736  | 13.79568 | 2.35430 |
| 11 | C    | 5.90749  | 13.79742 | 2.35440 |
| 12 | C    | 5.50354  | 12.40698 | 2.34861 |
| 13 | C    | 3.88075  | 10.78647 | 2.31940 |
| 14 | C    | 2.49026  | 10.38444 | 2.28093 |
| 15 | C    | 2.49000  | 8.96486  | 2.28273 |
| 16 | C    | 3.88001  | 8.56209  | 2.32183 |
| 17 | C    | 5.15446  | 14.96392 | 2.34974 |
| 18 | C    | 5.89778  | 16.15900 | 2.34641 |
| 19 | C    | 7.34545  | 16.15680 | 2.34612 |
| 20 | C    | 8.08449  | 14.95938 | 2.34929 |
| 21 | C    | 1.32502  | 8.21016  | 2.24218 |
| 22 | C    | 0.12974  | 8.95107  | 2.19582 |
| 23 | C    | 0.12974  | 10.39815 | 2.19355 |
| 24 | C    | 1.32523  | 11.13906 | 2.23809 |
| 25 | C    | 8.07625  | 4.38231  | 2.35415 |
| 26 | C    | 7.33380  | 3.18688  | 2.34995 |
| 27 | C    | 5.88610  | 3.18845  | 2.35041 |
| 28 | C    | 5.14619  | 4.38532  | 2.35500 |
| 29 | C    | 11.90419 | 11.13582 | 2.23971 |
| 30 | C    | 13.10014 | 10.39592 | 2.19481 |

|    |    |          |          |         |
|----|----|----------|----------|---------|
| 31 | C  | 13.10085 | 8.94877  | 2.19684 |
| 32 | C  | 11.90574 | 8.20704  | 2.24297 |
| 33 | C  | 15.64428 | 9.69084  | 5.37868 |
| 34 | N  | 6.61423  | 7.77011  | 2.35257 |
| 35 | N  | 4.23111  | 7.29184  | 2.33690 |
| 36 | N  | 8.99673  | 7.28856  | 2.33677 |
| 37 | N  | 8.51894  | 9.67101  | 2.33721 |
| 38 | N  | 8.99844  | 12.05303 | 2.33304 |
| 39 | N  | 6.61538  | 11.57532 | 2.34915 |
| 40 | N  | 4.23305  | 12.05654 | 2.33236 |
| 41 | N  | 4.71115  | 9.67396  | 2.33666 |
| 42 | Ni | 6.61507  | 9.67271  | 2.34808 |
| 43 | Ni | 15.62473 | 9.67412  | 2.13128 |
| 44 | Ni | 6.60687  | 0.66312  | 2.34127 |
| 45 | O  | 14.30775 | 8.40868  | 2.15177 |
| 46 | O  | 14.30623 | 10.93772 | 2.14758 |
| 47 | O  | 16.94224 | 10.93898 | 2.14678 |
| 48 | O  | 16.94236 | 8.40990  | 2.15108 |
| 49 | O  | 5.34445  | 1.98223  | 2.34424 |
| 50 | O  | 7.87270  | 1.97935  | 2.34343 |
| 51 | O  | 5.35971  | 17.36690 | 2.34194 |
| 52 | O  | 7.88791  | 17.36274 | 2.34141 |
| 53 | O  | 16.82036 | 9.69050  | 5.37280 |
| 54 | O  | 14.46821 | 9.69120  | 5.38124 |
| 55 | H  | 11.90553 | 12.22551 | 2.23694 |
| 56 | H  | 11.90917 | 7.11737  | 2.24247 |
| 57 | H  | 1.32282  | 12.22868 | 2.23509 |
| 58 | H  | 1.32253  | 7.12050  | 2.24217 |
| 59 | H  | 9.17408  | 14.95973 | 2.34574 |
| 60 | H  | 4.06481  | 14.96848 | 2.34661 |
| 61 | H  | 9.16586  | 4.37859  | 2.35041 |
| 62 | H  | 4.05653  | 4.38403  | 2.35192 |

COOH@NiPc-*Ni-O*

|   | ATOM | X        | Y        | Z       |
|---|------|----------|----------|---------|
| 1 | C    | 5.48994  | 6.94089  | 2.34758 |
| 2 | C    | 5.89213  | 5.55031  | 2.33912 |
| 3 | C    | 7.31183  | 5.54963  | 2.33476 |
| 4 | C    | 7.71502  | 6.93968  | 2.33829 |
| 5 | C    | 9.33784  | 8.56034  | 2.34101 |
| 6 | C    | 10.72843 | 8.96426  | 2.34568 |
| 7 | C    | 10.72768 | 10.37925 | 2.34237 |
| 8 | C    | 9.33859  | 10.78193 | 2.33676 |
| 9 | C    | 7.71708  | 12.40388 | 2.33145 |

|    |    |          |          |         |
|----|----|----------|----------|---------|
| 10 | C  | 7.31663  | 13.79435 | 2.32700 |
| 11 | C  | 5.89696  | 13.79668 | 2.33167 |
| 12 | C  | 5.49241  | 12.40643 | 2.34122 |
| 13 | C  | 3.86906  | 10.78584 | 2.36528 |
| 14 | C  | 2.47929  | 10.38338 | 2.37609 |
| 15 | C  | 2.47852  | 8.96807  | 2.37896 |
| 16 | C  | 3.86885  | 8.56358  | 2.36897 |
| 17 | C  | 5.14564  | 14.96474 | 2.33266 |
| 18 | C  | 5.88963  | 16.15880 | 2.33088 |
| 19 | C  | 7.33717  | 16.15586 | 2.32801 |
| 20 | C  | 8.07451  | 14.95820 | 2.32520 |
| 21 | C  | 1.30850  | 8.21713  | 2.39049 |
| 22 | C  | 0.11459  | 8.95698  | 2.36709 |
| 23 | C  | 0.11524  | 10.39899 | 2.36281 |
| 24 | C  | 1.30979  | 11.13635 | 2.38385 |
| 25 | C  | 8.06636  | 4.38357  | 2.33254 |
| 26 | C  | 7.32556  | 3.18787  | 2.33369 |
| 27 | C  | 5.87808  | 3.18870  | 2.33641 |
| 28 | C  | 5.13745  | 4.38456  | 2.33949 |
| 29 | C  | 11.89646 | 11.13355 | 2.35985 |
| 30 | C  | 13.09005 | 10.39623 | 2.35841 |
| 31 | C  | 13.09134 | 8.95550  | 2.36350 |
| 32 | C  | 11.89909 | 8.21380  | 2.36753 |
| 33 | C  | 15.70742 | 9.68936  | 4.47077 |
| 34 | N  | 6.60287  | 7.77163  | 2.34407 |
| 35 | N  | 4.21942  | 7.29259  | 2.36125 |
| 36 | N  | 8.98614  | 7.28979  | 2.33932 |
| 37 | N  | 8.50720  | 9.67067  | 2.33878 |
| 38 | N  | 8.98756  | 12.05232 | 2.33200 |
| 39 | N  | 6.60398  | 11.57383 | 2.33894 |
| 40 | N  | 4.22150  | 12.05616 | 2.35482 |
| 41 | N  | 4.69958  | 9.67363  | 2.36150 |
| 42 | Ni | 6.60344  | 9.67260  | 2.34618 |
| 43 | Ni | 15.61582 | 9.67907  | 2.50237 |
| 44 | Ni | 6.59982  | 0.66316  | 2.33437 |
| 45 | O  | 14.29873 | 8.39784  | 2.35704 |
| 46 | O  | 14.29685 | 10.95659 | 2.34468 |
| 47 | O  | 16.92970 | 10.95957 | 2.30716 |
| 48 | O  | 16.92940 | 8.39690  | 2.31761 |
| 49 | O  | 5.33642  | 1.98171  | 2.33731 |
| 50 | O  | 7.86588  | 1.98004  | 2.33327 |
| 51 | O  | 5.35162  | 17.36752 | 2.33392 |
| 52 | O  | 7.88100  | 17.36214 | 2.32978 |
| 53 | O  | 16.78404 | 9.68949  | 5.01433 |

|    |   |          |          |         |
|----|---|----------|----------|---------|
| 54 | O | 14.49446 | 9.69518  | 4.97145 |
| 55 | H | 11.89880 | 12.22313 | 2.36571 |
| 56 | H | 11.90621 | 7.12430  | 2.37956 |
| 57 | H | 1.30642  | 12.22600 | 2.38614 |
| 58 | H | 1.30246  | 7.12757  | 2.39837 |
| 59 | H | 9.16426  | 14.95703 | 2.32427 |
| 60 | H | 4.05590  | 14.97063 | 2.33680 |
| 61 | H | 9.15612  | 4.38122  | 2.33168 |
| 62 | H | 4.04774  | 4.38189  | 2.34335 |
| 63 | H | 14.51659 | 9.70097  | 5.96269 |

NiPc-Cu-O

|    | ATOM | X        | Y        | Z       |
|----|------|----------|----------|---------|
| 1  | C    | 5.66954  | 7.07323  | 3.04137 |
| 2  | C    | 6.07277  | 5.67983  | 3.04313 |
| 3  | C    | 7.49222  | 5.67905  | 3.03141 |
| 4  | C    | 7.89662  | 7.07240  | 3.02995 |
| 5  | C    | 9.52296  | 8.69698  | 3.02924 |
| 6  | C    | 10.91668 | 9.10088  | 3.02990 |
| 7  | C    | 10.91638 | 10.52032 | 3.03105 |
| 8  | C    | 9.52281  | 10.92359 | 3.02992 |
| 9  | C    | 7.89710  | 12.54840 | 3.02371 |
| 10 | C    | 7.49348  | 13.94173 | 3.01846 |
| 11 | C    | 6.07397  | 13.94181 | 3.02237 |
| 12 | C    | 5.67020  | 12.54862 | 3.02688 |
| 13 | C    | 4.04370  | 10.92446 | 3.03109 |
| 14 | C    | 2.64982  | 10.52141 | 3.02984 |
| 15 | C    | 2.64948  | 9.10191  | 3.03102 |
| 16 | C    | 4.04330  | 8.69799  | 3.03546 |
| 17 | C    | 5.32590  | 15.11044 | 3.02269 |
| 18 | C    | 6.04946  | 16.32907 | 3.02013 |
| 19 | C    | 7.51764  | 16.32902 | 3.01277 |
| 20 | C    | 8.24144  | 15.11040 | 3.01180 |
| 21 | C    | 1.47979  | 8.35475  | 3.02718 |
| 22 | C    | 0.26106  | 9.07882  | 3.02376 |
| 23 | C    | 0.26140  | 10.54676 | 3.02434 |
| 24 | C    | 1.48076  | 11.26969 | 3.02685 |
| 25 | C    | 8.23913  | 4.50959  | 3.02262 |
| 26 | C    | 7.51447  | 3.29138  | 3.02674 |
| 27 | C    | 6.04641  | 3.29244  | 3.04277 |
| 28 | C    | 5.32394  | 4.51165  | 3.05125 |
| 29 | C    | 12.08519 | 11.26884 | 3.03060 |
| 30 | C    | 13.30441 | 10.54601 | 3.02796 |
| 31 | C    | 13.30490 | 9.07810  | 3.02663 |

|    |    |          |          |         |
|----|----|----------|----------|---------|
| 32 | C  | 12.08639 | 8.35379  | 3.02798 |
| 33 | N  | 6.78337  | 7.90558  | 3.03465 |
| 34 | N  | 4.39857  | 7.42742  | 3.04152 |
| 35 | N  | 9.16772  | 7.42630  | 3.02707 |
| 36 | N  | 8.68992  | 9.81026  | 3.03016 |
| 37 | N  | 9.16799  | 12.19428 | 3.02620 |
| 38 | N  | 6.78363  | 11.71582 | 3.02743 |
| 39 | N  | 4.39918  | 12.19494 | 3.02916 |
| 40 | N  | 4.87645  | 9.81103  | 3.03340 |
| 41 | O  | 14.48204 | 8.50669  | 3.02361 |
| 42 | O  | 14.48108 | 11.11851 | 3.02584 |
| 43 | O  | 17.35806 | 11.11900 | 3.02252 |
| 44 | O  | 17.35746 | 8.50722  | 3.02063 |
| 45 | O  | 5.47296  | 2.11647  | 3.04668 |
| 46 | O  | 8.08550  | 2.11437  | 3.01653 |
| 47 | O  | 5.47701  | 17.50543 | 3.02491 |
| 48 | O  | 8.08978  | 17.50539 | 3.00906 |
| 49 | H  | 12.08409 | 12.35888 | 3.03137 |
| 50 | H  | 12.08688 | 7.26377  | 3.02661 |
| 51 | H  | 1.48156  | 12.35974 | 3.02663 |
| 52 | H  | 1.47940  | 7.26473  | 3.02649 |
| 53 | H  | 9.33147  | 15.11009 | 3.00700 |
| 54 | H  | 4.23587  | 15.11001 | 3.02624 |
| 55 | H  | 9.32913  | 4.50904  | 3.01120 |
| 56 | H  | 4.23397  | 4.51302  | 3.06293 |
| 57 | Cu | 15.91917 | 9.81315  | 3.02193 |
| 58 | Cu | 6.77746  | 0.67872  | 3.02360 |
| 59 | Ni | 6.78345  | 9.81073  | 3.03132 |

CO<sub>2</sub>@*NiPc*-Cu-O

|    | ATOM | X        | Y        | Z       |
|----|------|----------|----------|---------|
| 1  | C    | 5.66888  | 7.07215  | 2.95281 |
| 2  | C    | 6.07196  | 5.67961  | 2.97330 |
| 3  | C    | 7.49076  | 5.67875  | 2.97279 |
| 4  | C    | 7.89535  | 7.07122  | 2.95346 |
| 5  | C    | 9.52198  | 8.69587  | 2.95589 |
| 6  | C    | 10.91634 | 9.09974  | 2.97419 |
| 7  | C    | 10.91625 | 10.51969 | 2.97285 |
| 8  | C    | 9.52223  | 10.92351 | 2.95326 |
| 9  | C    | 7.89665  | 12.54865 | 2.95028 |
| 10 | C    | 7.49272  | 13.94127 | 2.96996 |
| 11 | C    | 6.07393  | 13.94087 | 2.97413 |
| 12 | C    | 5.67057  | 12.54843 | 2.95603 |
| 13 | C    | 4.04376  | 10.92424 | 2.95857 |

|    |   |          |          |         |
|----|---|----------|----------|---------|
| 14 | C | 2.64928  | 10.52100 | 2.97663 |
| 15 | C | 2.64881  | 9.10098  | 2.97427 |
| 16 | C | 4.04305  | 8.69683  | 2.95482 |
| 17 | C | 5.32563  | 15.11007 | 2.99705 |
| 18 | C | 6.04849  | 16.32845 | 3.01472 |
| 19 | C | 7.51592  | 16.32891 | 3.01022 |
| 20 | C | 8.23998  | 15.11118 | 2.98853 |
| 21 | C | 1.48020  | 8.35341  | 2.99403 |
| 22 | C | 0.26136  | 9.07756  | 3.01544 |
| 23 | C | 0.26181  | 10.54647 | 3.01706 |
| 24 | C | 1.48120  | 11.26970 | 2.99789 |
| 25 | C | 8.23721  | 4.50810  | 2.99291 |
| 26 | C | 7.51239  | 3.29061  | 3.01312 |
| 27 | C | 6.04498  | 3.29194  | 3.01510 |
| 28 | C | 5.32298  | 4.51072  | 2.99549 |
| 29 | C | 12.08418 | 11.26850 | 2.99367 |
| 30 | C | 13.30338 | 10.54541 | 3.01520 |
| 31 | C | 13.30381 | 9.07659  | 3.01568 |
| 32 | C | 12.08508 | 8.35218  | 2.99552 |
| 33 | C | 6.76617  | 9.67867  | 6.20204 |
| 34 | N | 6.78241  | 7.90459  | 2.93877 |
| 35 | N | 4.39760  | 7.42664  | 2.95657 |
| 36 | N | 9.16673  | 7.42570  | 2.95861 |
| 37 | N | 8.68931  | 9.80985  | 2.94299 |
| 38 | N | 9.16794  | 12.19386 | 2.95325 |
| 39 | N | 6.78370  | 11.71579 | 2.93861 |
| 40 | N | 4.39919  | 12.19408 | 2.96295 |
| 41 | N | 4.87612  | 9.81005  | 2.94399 |
| 42 | O | 14.48054 | 8.50643  | 3.03555 |
| 43 | O | 14.47960 | 11.11671 | 3.03524 |
| 44 | O | 17.35891 | 11.11744 | 3.03704 |
| 45 | O | 17.35811 | 8.50728  | 3.03443 |
| 46 | O | 5.47066  | 2.11606  | 3.03442 |
| 47 | O | 8.08384  | 2.11338  | 3.02995 |
| 48 | O | 5.47506  | 17.50473 | 3.03503 |
| 49 | O | 8.08832  | 17.50560 | 3.02667 |
| 50 | O | 7.39115  | 8.68269  | 6.19508 |
| 51 | O | 6.14121  | 10.67479 | 6.19709 |
| 52 | H | 12.08344 | 12.35846 | 2.99472 |
| 53 | H | 12.08571 | 7.26227  | 2.99774 |
| 54 | H | 1.48202  | 12.35966 | 3.00078 |
| 55 | H | 1.47977  | 7.26343  | 2.99408 |
| 56 | H | 9.33024  | 15.11195 | 2.98685 |
| 57 | H | 4.23545  | 15.10934 | 3.00158 |

|    |    |          |         |         |
|----|----|----------|---------|---------|
| 58 | H  | 9.32746  | 4.50680 | 2.99302 |
| 59 | H  | 4.23285  | 4.51223 | 2.99784 |
| 60 | Cu | 15.91892 | 9.81222 | 3.04267 |
| 61 | Cu | 6.77553  | 0.67835 | 3.03829 |
| 62 | Ni | 6.78310  | 9.81011 | 2.93065 |

COOH@*NiPc*-Cu-O

|    | ATOM | X        | Y        | Z       |
|----|------|----------|----------|---------|
| 1  | C    | 5.65564  | 7.06137  | 3.01042 |
| 2  | C    | 6.06535  | 5.67508  | 3.04470 |
| 3  | C    | 7.48301  | 5.67717  | 3.06934 |
| 4  | C    | 7.88871  | 7.06604  | 3.04551 |
| 5  | C    | 9.52077  | 8.69548  | 3.03414 |
| 6  | C    | 10.91165 | 9.09952  | 3.04248 |
| 7  | C    | 10.91515 | 10.51717 | 3.03462 |
| 8  | C    | 9.52720  | 10.92800 | 3.02264 |
| 9  | C    | 7.89871  | 12.55335 | 3.05420 |
| 10 | C    | 7.48797  | 13.93898 | 3.08596 |
| 11 | C    | 6.07022  | 13.93724 | 3.09550 |
| 12 | C    | 5.66324  | 12.54972 | 3.06863 |
| 13 | C    | 4.03183  | 10.92204 | 3.03652 |
| 14 | C    | 2.64227  | 10.51540 | 3.03834 |
| 15 | C    | 2.64133  | 9.09837  | 3.01323 |
| 16 | C    | 4.02889  | 8.68853  | 2.99964 |
| 17 | C    | 5.32285  | 15.11004 | 3.08678 |
| 18 | C    | 6.04354  | 16.32746 | 3.08349 |
| 19 | C    | 7.51129  | 16.32858 | 3.07753 |
| 20 | C    | 8.23360  | 15.11254 | 3.07054 |
| 21 | C    | 1.46929  | 8.35184  | 2.97641 |
| 22 | C    | 0.25263  | 9.07292  | 2.98037 |
| 23 | C    | 0.25206  | 10.53770 | 3.00338 |
| 24 | C    | 1.46824  | 11.26060 | 3.02556 |
| 25 | C    | 8.22970  | 4.50417  | 3.07333 |
| 26 | C    | 7.50822  | 3.28650  | 3.06853 |
| 27 | C    | 6.04036  | 3.28590  | 3.04750 |
| 28 | C    | 5.31891  | 4.50262  | 3.02669 |
| 29 | C    | 12.08908 | 11.26076 | 3.00781 |
| 30 | C    | 13.30390 | 10.53586 | 3.00031 |
| 31 | C    | 13.30105 | 9.07077  | 3.00364 |
| 32 | C    | 12.08274 | 8.35099  | 3.01922 |
| 33 | C    | 6.77285  | 9.78674  | 5.14130 |
| 34 | N    | 6.77074  | 7.89083  | 2.97277 |
| 35 | N    | 4.38494  | 7.41809  | 3.01495 |
| 36 | N    | 9.15816  | 7.42704  | 3.07370 |

|    |    |          |          |         |
|----|----|----------|----------|---------|
| 37 | N  | 8.69715  | 9.81410  | 2.97239 |
| 38 | N  | 9.16977  | 12.19772 | 3.05759 |
| 39 | N  | 6.78231  | 11.72359 | 3.01034 |
| 40 | N  | 4.39349  | 12.18988 | 3.08063 |
| 41 | N  | 4.85884  | 9.80409  | 2.96986 |
| 42 | O  | 14.47757 | 8.49126  | 2.99948 |
| 43 | O  | 14.48225 | 11.11147 | 2.99666 |
| 44 | O  | 17.34705 | 11.11397 | 3.00987 |
| 45 | O  | 17.34909 | 8.49385  | 2.97130 |
| 46 | O  | 5.46230  | 2.11077  | 3.05378 |
| 47 | O  | 8.08517  | 2.11094  | 3.08729 |
| 48 | O  | 5.46508  | 17.50277 | 3.08953 |
| 49 | O  | 8.08875  | 17.50439 | 3.08178 |
| 50 | O  | 7.55781  | 9.05864  | 5.68198 |
| 51 | O  | 5.86735  | 10.61367 | 5.57180 |
| 52 | H  | 12.09151 | 12.35086 | 2.99874 |
| 53 | H  | 12.08038 | 7.26082  | 3.01906 |
| 54 | H  | 1.46671  | 12.35075 | 3.03918 |
| 55 | H  | 1.47082  | 7.26194  | 2.95313 |
| 56 | H  | 9.32364  | 15.11277 | 3.05714 |
| 57 | H  | 4.23277  | 15.10905 | 3.08554 |
| 58 | H  | 9.31978  | 4.50480  | 3.08455 |
| 59 | H  | 4.22906  | 4.50355  | 3.00229 |
| 60 | H  | 5.83104  | 10.62914 | 6.56763 |
| 61 | Cu | 15.91392 | 9.80065  | 2.99233 |
| 62 | Cu | 6.77172  | 0.67494  | 3.07836 |
| 63 | Ni | 6.77498  | 9.80891  | 3.12490 |

CO<sub>2</sub>@NiPc-*Cu-O*

|    | ATOM | X        | Y        | Z       |
|----|------|----------|----------|---------|
| 1  | C    | 5.67029  | 7.07478  | 3.03142 |
| 2  | C    | 6.07341  | 5.68217  | 3.04582 |
| 3  | C    | 7.49271  | 5.68090  | 3.04132 |
| 4  | C    | 7.89764  | 7.07427  | 3.02603 |
| 5  | C    | 9.52450  | 8.69817  | 2.99108 |
| 6  | C    | 10.91802 | 9.10206  | 2.95795 |
| 7  | C    | 10.91781 | 10.52090 | 2.95852 |
| 8  | C    | 9.52498  | 10.92459 | 2.99139 |
| 9  | C    | 7.89822  | 12.54888 | 3.02414 |
| 10 | C    | 7.49408  | 13.94237 | 3.03781 |
| 11 | C    | 6.07473  | 13.94194 | 3.04000 |
| 12 | C    | 5.67102  | 12.54943 | 3.02640 |
| 13 | C    | 4.04376  | 10.92543 | 2.99508 |
| 14 | C    | 2.65059  | 10.52210 | 2.96282 |

|    |   |          |          |         |
|----|---|----------|----------|---------|
| 15 | C | 2.65029  | 9.10311  | 2.96472 |
| 16 | C | 4.04389  | 8.69933  | 2.99798 |
| 17 | C | 5.32622  | 15.11090 | 3.04414 |
| 18 | C | 6.04888  | 16.32989 | 3.04312 |
| 19 | C | 7.51684  | 16.33050 | 3.03950 |
| 20 | C | 8.24133  | 15.11173 | 3.03847 |
| 21 | C | 1.48007  | 8.35619  | 2.93403 |
| 22 | C | 0.26165  | 9.07992  | 2.89553 |
| 23 | C | 0.26197  | 10.54653 | 2.89412 |
| 24 | C | 1.48045  | 11.26957 | 2.93046 |
| 25 | C | 8.23902  | 4.51082  | 3.04104 |
| 26 | C | 7.51360  | 3.29244  | 3.04283 |
| 27 | C | 6.04569  | 3.29416  | 3.04828 |
| 28 | C | 5.32404  | 4.51372  | 3.05125 |
| 29 | C | 12.08795 | 11.26853 | 2.92839 |
| 30 | C | 13.30618 | 10.54560 | 2.89249 |
| 31 | C | 13.30663 | 9.07934  | 2.89144 |
| 32 | C | 12.08845 | 8.35532  | 2.92689 |
| 33 | C | 15.83487 | 9.74704  | 6.14597 |
| 34 | N | 6.78481  | 7.90739  | 3.02401 |
| 35 | N | 4.39920  | 7.42858  | 3.01563 |
| 36 | N | 9.16911  | 7.42730  | 3.00673 |
| 37 | N | 8.69170  | 9.81111  | 3.00505 |
| 38 | N | 9.16953  | 12.19530 | 3.00659 |
| 39 | N | 6.78514  | 11.71637 | 3.02137 |
| 40 | N | 4.39985  | 12.19590 | 3.01000 |
| 41 | N | 4.87688  | 9.81193  | 3.00916 |
| 42 | O | 14.48386 | 8.50710  | 2.85585 |
| 43 | O | 14.48338 | 11.11863 | 2.85819 |
| 44 | O | 17.35847 | 11.11925 | 2.85609 |
| 45 | O | 17.35829 | 8.50748  | 2.85798 |
| 46 | O | 5.47176  | 2.11836  | 3.04746 |
| 47 | O | 8.08434  | 2.11565  | 3.03752 |
| 48 | O | 5.47600  | 17.50608 | 3.04306 |
| 49 | O | 8.08858  | 17.50671 | 3.03549 |
| 50 | O | 17.01053 | 9.76393  | 6.12687 |
| 51 | O | 14.65919 | 9.73035  | 6.15065 |
| 52 | H | 12.08799 | 12.35868 | 2.92904 |
| 53 | H | 12.08974 | 7.26520  | 2.92626 |
| 54 | H | 1.48034  | 12.35972 | 2.92901 |
| 55 | H | 1.47905  | 7.26606  | 2.93532 |
| 56 | H | 9.33153  | 15.11272 | 3.03550 |
| 57 | H | 4.23605  | 15.10994 | 3.04555 |
| 58 | H | 9.32923  | 4.50896  | 3.03631 |

|    |    |          |         |         |
|----|----|----------|---------|---------|
| 59 | H  | 4.23386  | 4.51561 | 3.05452 |
| 60 | Cu | 15.92057 | 9.81322 | 2.83205 |
| 61 | Cu | 6.77593  | 0.68011 | 3.03923 |
| 62 | Ni | 6.78477  | 9.81174 | 3.01664 |

COOH@NiPc-*Cu-O*

|    | ATOM | X        | Y        | Z       |
|----|------|----------|----------|---------|
| 1  | C    | 5.65238  | 7.06886  | 3.06427 |
| 2  | C    | 6.05449  | 5.67699  | 3.05549 |
| 3  | C    | 7.47082  | 5.67647  | 3.03888 |
| 4  | C    | 7.87348  | 7.06744  | 3.03810 |
| 5  | C    | 9.49449  | 8.69292  | 3.01915 |
| 6  | C    | 10.88420 | 9.09404  | 3.00406 |
| 7  | C    | 10.88390 | 10.51646 | 3.02376 |
| 8  | C    | 9.48986  | 10.91953 | 3.03573 |
| 9  | C    | 7.87609  | 12.55004 | 3.05184 |
| 10 | C    | 7.47429  | 13.94139 | 3.05183 |
| 11 | C    | 6.05858  | 13.94178 | 3.06607 |
| 12 | C    | 5.65528  | 12.55014 | 3.07125 |
| 13 | C    | 4.03816  | 10.92212 | 3.07269 |
| 14 | C    | 2.64332  | 10.52056 | 3.05722 |
| 15 | C    | 2.64137  | 9.09747  | 3.05552 |
| 16 | C    | 4.03120  | 8.69496  | 3.07163 |
| 17 | C    | 5.31158  | 15.11270 | 3.06392 |
| 18 | C    | 6.03437  | 16.33002 | 3.04794 |
| 19 | C    | 7.49890  | 16.32978 | 3.03412 |
| 20 | C    | 8.22153  | 15.11267 | 3.03434 |
| 21 | C    | 1.47948  | 8.34709  | 3.04527 |
| 22 | C    | 0.25566  | 9.06431  | 2.97727 |
| 23 | C    | 0.26109  | 10.55115 | 2.93206 |
| 24 | C    | 1.48583  | 11.27097 | 3.03825 |
| 25 | C    | 8.21723  | 4.50450  | 3.02038 |
| 26 | C    | 7.49423  | 3.28762  | 3.02213 |
| 27 | C    | 6.02922  | 3.28812  | 3.03811 |
| 28 | C    | 5.30717  | 4.50586  | 3.05275 |
| 29 | C    | 12.04247 | 11.26654 | 3.04559 |
| 30 | C    | 13.26679 | 10.54545 | 2.97414 |
| 31 | C    | 13.27029 | 9.05963  | 2.99637 |
| 32 | C    | 12.04511 | 8.34200  | 3.00539 |
| 33 | C    | 16.12766 | 9.97459  | 5.16831 |
| 34 | N    | 6.76306  | 7.90368  | 3.05418 |
| 35 | N    | 4.38113  | 7.42473  | 3.07194 |
| 36 | N    | 9.14460  | 7.42290  | 3.02027 |
| 37 | N    | 8.66260  | 9.81012  | 3.03762 |

|    |    |          |          |         |
|----|----|----------|----------|---------|
| 38 | N  | 9.14594  | 12.19293 | 3.04285 |
| 39 | N  | 6.76503  | 11.71435 | 3.06142 |
| 40 | N  | 4.38477  | 12.19486 | 3.07628 |
| 41 | N  | 4.86370  | 9.81165  | 3.07629 |
| 42 | O  | 14.42933 | 8.48913  | 3.01661 |
| 43 | O  | 14.41825 | 11.12058 | 2.86876 |
| 44 | O  | 17.39267 | 11.12482 | 2.76093 |
| 45 | O  | 17.37193 | 8.49127  | 2.93930 |
| 46 | O  | 5.45239  | 2.11108  | 3.03675 |
| 47 | O  | 8.07025  | 2.10993  | 3.00815 |
| 48 | O  | 5.45759  | 17.50721 | 3.04221 |
| 49 | O  | 8.07586  | 17.50716 | 3.01949 |
| 50 | O  | 17.23259 | 10.00885 | 5.66488 |
| 51 | O  | 14.94616 | 10.00038 | 5.76085 |
| 52 | H  | 12.04085 | 12.35610 | 3.07590 |
| 53 | H  | 12.03995 | 7.25206  | 3.01174 |
| 54 | H  | 1.48722  | 12.36103 | 3.04602 |
| 55 | H  | 1.48252  | 7.25732  | 3.06551 |
| 56 | H  | 9.31167  | 15.11329 | 3.01792 |
| 57 | H  | 4.22147  | 15.11246 | 3.07097 |
| 58 | H  | 9.30738  | 4.50321  | 3.00281 |
| 59 | H  | 4.21708  | 4.50623  | 3.05900 |
| 60 | H  | 15.04341 | 10.05505 | 6.74544 |
| 61 | Cu | 15.91199 | 9.84544  | 3.20851 |
| 62 | Cu | 6.76103  | 0.67704  | 3.02279 |
| 63 | Ni | 6.76373  | 9.80947  | 3.06004 |

# NiPc-Zn-O

|    | ATOM | X        | Y        | Z       |
|----|------|----------|----------|---------|
| 1  | C    | 5.70326  | 7.12698  | 3.01799 |
| 2  | C    | 6.10558  | 5.73127  | 3.02614 |
| 3  | C    | 7.52710  | 5.72990  | 3.02395 |
| 4  | C    | 7.93200  | 7.12510  | 3.01668 |
| 5  | C    | 9.56193  | 8.75279  | 3.01354 |
| 6  | C    | 10.95769 | 9.15642  | 3.01424 |
| 7  | C    | 10.95731 | 10.57787 | 3.01536 |
| 8  | C    | 9.56219  | 10.98136 | 3.01365 |
| 9  | C    | 7.93477  | 12.61113 | 3.01224 |
| 10 | C    | 7.53266  | 14.00683 | 3.01623 |
| 11 | C    | 6.11122  | 14.00835 | 3.01816 |
| 12 | C    | 5.70641  | 12.61309 | 3.01327 |
| 13 | C    | 4.07683  | 10.98536 | 3.01070 |
| 14 | C    | 2.68111  | 10.58269 | 3.00945 |
| 15 | C    | 2.68023  | 9.16123  | 3.00850 |

|    |    |          |          |         |
|----|----|----------|----------|---------|
| 16 | C  | 4.07543  | 8.75676  | 3.01083 |
| 17 | C  | 5.37009  | 15.18077 | 3.02722 |
| 18 | C  | 6.08042  | 16.41388 | 3.03592 |
| 19 | C  | 7.57028  | 16.41195 | 3.03233 |
| 20 | C  | 8.27711  | 15.17715 | 3.02168 |
| 21 | C  | 1.50828  | 8.41928  | 3.00623 |
| 22 | C  | 0.27489  | 9.12878  | 3.00503 |
| 23 | C  | 0.27566  | 10.61861 | 3.00735 |
| 24 | C  | 1.51019  | 11.32634 | 3.00951 |
| 25 | C  | 8.26841  | 4.55747  | 3.03054 |
| 26 | C  | 7.55832  | 3.32423  | 3.04088 |
| 27 | C  | 6.06846  | 3.32597  | 3.04489 |
| 28 | C  | 5.36144  | 4.56076  | 3.03676 |
| 29 | C  | 12.12790 | 11.32191 | 3.01688 |
| 30 | C  | 13.36234 | 10.61466 | 3.01450 |
| 31 | C  | 13.36343 | 9.12480  | 3.01220 |
| 32 | C  | 12.12995 | 8.41484  | 3.01330 |
| 33 | N  | 6.81827  | 7.95790  | 3.01390 |
| 34 | N  | 4.43203  | 7.48513  | 3.01494 |
| 35 | N  | 9.20382  | 7.48148  | 3.01501 |
| 36 | N  | 8.73015  | 9.86734  | 3.01271 |
| 37 | N  | 9.20587  | 12.25303 | 3.01299 |
| 38 | N  | 6.81994  | 11.78015 | 3.01066 |
| 39 | N  | 4.43472  | 12.25669 | 3.01250 |
| 40 | N  | 4.90802  | 9.87054  | 3.01079 |
| 41 | O  | 14.51801 | 8.53417  | 3.00877 |
| 42 | O  | 14.51581 | 11.20788 | 3.01334 |
| 43 | O  | 17.60768 | 11.21114 | 3.00720 |
| 44 | O  | 17.60626 | 8.53744  | 3.00228 |
| 45 | O  | 5.47511  | 2.17269  | 3.05565 |
| 46 | O  | 8.14876  | 2.16950  | 3.04752 |
| 47 | O  | 5.49012  | 17.56863 | 3.04781 |
| 48 | O  | 8.16402  | 17.56506 | 3.04049 |
| 49 | H  | 12.12422 | 12.41232 | 3.01901 |
| 50 | H  | 12.12917 | 7.32438  | 3.01231 |
| 51 | H  | 1.51320  | 12.41677 | 3.01129 |
| 52 | H  | 1.50961  | 7.32885  | 3.00516 |
| 53 | H  | 9.36753  | 15.17333 | 3.01954 |
| 54 | H  | 4.27964  | 15.18024 | 3.02966 |
| 55 | H  | 9.35884  | 4.55826  | 3.02835 |
| 56 | H  | 4.27100  | 4.56441  | 3.03972 |
| 57 | Ni | 6.81912  | 9.86884  | 3.01107 |
| 58 | Zn | 16.06192 | 9.87375  | 3.00478 |
| 59 | Zn | 6.80931  | 0.62555  | 3.05537 |

CO<sub>2</sub>@*NiPc*-Zn-O

| ATOM |   | X        | Y        | Z       |
|------|---|----------|----------|---------|
| 1    | C | 5.70241  | 7.12658  | 2.93940 |
| 2    | C | 6.10485  | 5.73116  | 2.96391 |
| 3    | C | 7.52636  | 5.73002  | 2.96879 |
| 4    | C | 7.93092  | 7.12517  | 2.94733 |
| 5    | C | 9.56059  | 8.75304  | 2.94571 |
| 6    | C | 10.95635 | 9.15593  | 2.96039 |
| 7    | C | 10.95682 | 10.57742 | 2.95733 |
| 8    | C | 9.56181  | 10.98157 | 2.94124 |
| 9    | C | 7.93438  | 12.61111 | 2.94447 |
| 10   | C | 7.53182  | 14.00663 | 2.96769 |
| 11   | C | 6.11030  | 14.00768 | 2.97050 |
| 12   | C | 5.70592  | 12.61244 | 2.94839 |
| 13   | C | 4.07621  | 10.98460 | 2.94201 |
| 14   | C | 2.68052  | 10.58178 | 2.95527 |
| 15   | C | 2.67996  | 9.16025  | 2.95007 |
| 16   | C | 4.07496  | 8.75610  | 2.93429 |
| 17   | C | 5.36886  | 15.17977 | 2.99643 |
| 18   | C | 6.07899  | 16.41313 | 3.01927 |
| 19   | C | 7.56893  | 16.41144 | 3.01656 |
| 20   | C | 8.27606  | 15.17682 | 2.99107 |
| 21   | C | 1.50887  | 8.41729  | 2.96671 |
| 22   | C | 0.27500  | 9.12584  | 2.98599 |
| 23   | C | 0.27495  | 10.61579 | 2.99077 |
| 24   | C | 1.50911  | 11.32451 | 2.97661 |
| 25   | C | 8.26773  | 4.55790  | 2.99597 |
| 26   | C | 7.55755  | 3.32461  | 3.01865 |
| 27   | C | 6.06759  | 3.32625  | 3.01441 |
| 28   | C | 5.36049  | 4.56092  | 2.98719 |
| 29   | C | 12.12798 | 11.32041 | 2.97456 |
| 30   | C | 13.36191 | 10.61195 | 2.99166 |
| 31   | C | 13.36182 | 9.12200  | 2.99511 |
| 32   | C | 12.12761 | 8.41324  | 2.98057 |
| 33   | C | 6.77960  | 9.77123  | 6.17649 |
| 34   | N | 6.81716  | 7.95766  | 2.92879 |
| 35   | N | 4.43128  | 7.48444  | 2.93710 |
| 36   | N | 9.20239  | 7.48189  | 2.95198 |
| 37   | N | 8.72935  | 9.86772  | 2.93227 |
| 38   | N | 9.20545  | 12.25315 | 2.94423 |
| 39   | N | 6.81963  | 11.78003 | 2.93197 |
| 40   | N | 4.43441  | 12.25571 | 2.95051 |
| 41   | N | 4.90742  | 9.86985  | 2.92732 |

|    |    |          |          |         |
|----|----|----------|----------|---------|
| 42 | O  | 14.51561 | 8.53052  | 3.01170 |
| 43 | O  | 14.51564 | 11.20398 | 3.00478 |
| 44 | O  | 17.60681 | 11.20719 | 3.00868 |
| 45 | O  | 17.60701 | 8.53375  | 3.00054 |
| 46 | O  | 5.47432  | 2.17327  | 3.03674 |
| 47 | O  | 8.14759  | 2.17018  | 3.04410 |
| 48 | O  | 5.48874  | 17.56743 | 3.04335 |
| 49 | O  | 8.16228  | 17.56442 | 3.03849 |
| 50 | O  | 7.56279  | 8.89396  | 6.16855 |
| 51 | O  | 5.99646  | 10.64850 | 6.17550 |
| 52 | H  | 12.12546 | 12.41076 | 2.97583 |
| 53 | H  | 12.12543 | 7.32282  | 2.98599 |
| 54 | H  | 1.51129  | 12.41492 | 2.98378 |
| 55 | H  | 1.51152  | 7.32697  | 2.96659 |
| 56 | H  | 9.36641  | 15.17325 | 2.99141 |
| 57 | H  | 4.27851  | 15.17883 | 3.00080 |
| 58 | H  | 9.35814  | 4.55891  | 3.00144 |
| 59 | H  | 4.27023  | 4.56489  | 2.98645 |
| 60 | Ni | 6.81845  | 9.86881  | 2.92018 |
| 61 | Zn | 16.06128 | 9.86827  | 3.00990 |
| 62 | Zn | 6.80784  | 0.62544  | 3.05469 |

COOH@*NiPc*-Zn-O

|    | ATOM | X        | Y        | Z       |
|----|------|----------|----------|---------|
| 1  | C    | 5.69202  | 7.11840  | 3.06235 |
| 2  | C    | 6.10150  | 5.72851  | 3.07659 |
| 3  | C    | 7.52097  | 5.72759  | 3.07977 |
| 4  | C    | 7.93259  | 7.11678  | 3.06727 |
| 5  | C    | 9.57066  | 8.74772  | 2.99970 |
| 6  | C    | 10.96314 | 9.15306  | 3.03024 |
| 7  | C    | 10.96245 | 10.57427 | 3.03271 |
| 8  | C    | 9.57025  | 10.97881 | 3.00374 |
| 9  | C    | 7.93412  | 12.61208 | 3.07491 |
| 10 | C    | 7.52615  | 14.00246 | 3.08730 |
| 11 | C    | 6.10677  | 14.00519 | 3.08311 |
| 12 | C    | 5.69434  | 12.61606 | 3.06834 |
| 13 | C    | 4.05816  | 10.98502 | 2.99262 |
| 14 | C    | 2.66790  | 10.57934 | 3.02205 |
| 15 | C    | 2.66742  | 9.15873  | 3.02000 |
| 16 | C    | 4.05741  | 8.75219  | 2.98943 |
| 17 | C    | 5.36882  | 15.18426 | 3.05538 |
| 18 | C    | 6.07905  | 16.41413 | 3.04134 |
| 19 | C    | 7.56412  | 16.41117 | 3.04593 |
| 20 | C    | 8.26913  | 15.17852 | 3.06416 |

|    |    |          |          |         |
|----|----|----------|----------|---------|
| 21 | C  | 1.49209  | 8.41746  | 3.00066 |
| 22 | C  | 0.26209  | 9.12650  | 2.99555 |
| 23 | C  | 0.26259  | 10.61428 | 2.99723 |
| 24 | C  | 1.49343  | 11.32200 | 3.00463 |
| 25 | C  | 8.26044  | 4.54889  | 3.05705 |
| 26 | C  | 7.55196  | 3.31823  | 3.04063 |
| 27 | C  | 6.06697  | 3.31950  | 3.03630 |
| 28 | C  | 5.36032  | 4.55136  | 3.04947 |
| 29 | C  | 12.13477 | 11.31821 | 3.01740 |
| 30 | C  | 13.36683 | 10.61099 | 3.00950 |
| 31 | C  | 13.36814 | 9.12236  | 3.00807 |
| 32 | C  | 12.13738 | 8.41208  | 3.01335 |
| 33 | C  | 6.82101  | 9.84875  | 5.13045 |
| 34 | N  | 6.81244  | 7.94694  | 3.04449 |
| 35 | N  | 4.42239  | 7.48297  | 3.05029 |
| 36 | N  | 9.20348  | 7.47874  | 3.05990 |
| 37 | N  | 8.74887  | 9.86350  | 2.90575 |
| 38 | N  | 9.20404  | 12.24784 | 3.06725 |
| 39 | N  | 6.81251  | 11.78489 | 3.05121 |
| 40 | N  | 4.42396  | 12.25392 | 3.05606 |
| 41 | N  | 4.88239  | 9.86849  | 2.89048 |
| 42 | O  | 14.52411 | 8.53173  | 3.00819 |
| 43 | O  | 14.52165 | 11.20423 | 3.00994 |
| 44 | O  | 17.59219 | 11.20715 | 3.00053 |
| 45 | O  | 17.59129 | 8.53442  | 2.99796 |
| 46 | O  | 5.47302  | 2.16202  | 3.02157 |
| 47 | O  | 8.14358  | 2.15923  | 3.02975 |
| 48 | O  | 5.48866  | 17.57333 | 3.02495 |
| 49 | O  | 8.15933  | 17.56814 | 3.03327 |
| 50 | O  | 7.87961  | 9.92398  | 5.69557 |
| 51 | O  | 5.59700  | 9.75130  | 5.58056 |
| 52 | H  | 12.13075 | 12.40863 | 3.01502 |
| 53 | H  | 12.13650 | 7.32166  | 3.00791 |
| 54 | H  | 1.49650  | 12.41228 | 3.00285 |
| 55 | H  | 1.49381  | 7.32720  | 2.99568 |
| 56 | H  | 9.35955  | 15.17381 | 3.06053 |
| 57 | H  | 4.27838  | 15.18405 | 3.04489 |
| 58 | H  | 9.35090  | 4.55032  | 3.05308 |
| 59 | H  | 4.26987  | 4.55469  | 3.03951 |
| 60 | H  | 5.58330  | 9.74307  | 6.57462 |
| 61 | Ni | 6.80975  | 9.86519  | 3.12682 |
| 62 | Zn | 16.05933 | 9.87021  | 3.00857 |
| 63 | Zn | 6.80666  | 0.62262  | 3.01891 |

CO<sub>2</sub>@NiPc-**Zn-O**

|    | ATOM | X        | Y        | Z       |
|----|------|----------|----------|---------|
| 1  | C    | 5.68399  | 7.12716  | 3.02073 |
| 2  | C    | 6.08652  | 5.73153  | 3.03140 |
| 3  | C    | 7.50763  | 5.73030  | 3.02312 |
| 4  | C    | 7.91209  | 7.12546  | 3.00777 |
| 5  | C    | 9.54114  | 8.75350  | 2.98061 |
| 6  | C    | 10.93687 | 9.15656  | 2.95903 |
| 7  | C    | 10.93762 | 10.57843 | 2.96942 |
| 8  | C    | 9.54229  | 10.98240 | 2.99183 |
| 9  | C    | 7.91482  | 12.61215 | 3.01694 |
| 10 | C    | 7.51270  | 14.00770 | 3.02966 |
| 11 | C    | 6.09154  | 14.00934 | 3.02747 |
| 12 | C    | 5.68646  | 12.61415 | 3.01463 |
| 13 | C    | 4.05704  | 10.98601 | 2.99728 |
| 14 | C    | 2.66108  | 10.58258 | 2.98392 |
| 15 | C    | 2.66136  | 9.16093  | 2.99007 |
| 16 | C    | 4.05668  | 8.75726  | 3.00471 |
| 17 | C    | 5.35096  | 15.18271 | 3.03490 |
| 18 | C    | 6.06148  | 16.41543 | 3.04542 |
| 19 | C    | 7.55075  | 16.41332 | 3.04794 |
| 20 | C    | 8.25719  | 15.17848 | 3.03950 |
| 21 | C    | 1.49073  | 8.41726  | 2.98148 |
| 22 | C    | 0.25670  | 9.12492  | 2.96361 |
| 23 | C    | 0.25553  | 10.61472 | 2.95722 |
| 24 | C    | 1.48912  | 11.32442 | 2.96821 |
| 25 | C    | 8.24911  | 4.55753  | 3.02805 |
| 26 | C    | 7.53943  | 3.32428  | 3.04181 |
| 27 | C    | 6.05018  | 3.32590  | 3.04957 |
| 28 | C    | 5.34291  | 4.56021  | 3.04415 |
| 29 | C    | 12.10866 | 11.32104 | 2.96026 |
| 30 | C    | 13.34266 | 10.61211 | 2.93897 |
| 31 | C    | 13.34176 | 9.12135  | 2.92195 |
| 32 | C    | 12.10710 | 8.41319  | 2.93437 |
| 33 | C    | 16.77239 | 9.65718  | 6.36805 |
| 34 | N    | 6.79865  | 7.95862  | 3.01003 |
| 35 | N    | 4.41280  | 7.48566  | 3.01644 |
| 36 | N    | 9.18374  | 7.48220  | 2.98977 |
| 37 | N    | 8.71022  | 9.86831  | 2.99531 |
| 38 | N    | 9.18612  | 12.25388 | 3.00670 |
| 39 | N    | 6.80000  | 11.78089 | 3.01114 |
| 40 | N    | 4.41464  | 12.25730 | 3.00449 |
| 41 | N    | 4.88852  | 9.87135  | 3.00528 |
| 42 | O    | 14.49390 | 8.52858  | 2.89775 |

|    |    |          |          |         |
|----|----|----------|----------|---------|
| 43 | O  | 14.49581 | 11.20378 | 2.93356 |
| 44 | O  | 17.58688 | 11.20543 | 2.94369 |
| 45 | O  | 17.58931 | 8.53151  | 2.95437 |
| 46 | O  | 5.45653  | 2.17232  | 3.06117 |
| 47 | O  | 8.13011  | 2.16925  | 3.04798 |
| 48 | O  | 5.47096  | 17.57054 | 3.05306 |
| 49 | O  | 8.14476  | 17.56673 | 3.05773 |
| 50 | O  | 17.62068 | 9.53291  | 7.16772 |
| 51 | O  | 15.91802 | 9.78242  | 5.56635 |
| 52 | H  | 12.10705 | 12.41140 | 2.97099 |
| 53 | H  | 12.10486 | 7.32281  | 2.92551 |
| 54 | H  | 1.48936  | 12.41481 | 2.96392 |
| 55 | H  | 1.49269  | 7.32692  | 2.98787 |
| 56 | H  | 9.34764  | 15.17487 | 3.04091 |
| 57 | H  | 4.26055  | 15.18343 | 3.03290 |
| 58 | H  | 9.33954  | 4.55821  | 3.02199 |
| 59 | H  | 4.25252  | 4.56270  | 3.05004 |
| 60 | Ni | 6.79931  | 9.86975  | 3.00582 |
| 61 | Zn | 16.04069 | 9.86480  | 2.94518 |
| 62 | Zn | 6.78961  | 0.62642  | 3.06299 |

COOH@NiPc-Zn-O

|    | ATOM | X        | Y        | Z       |
|----|------|----------|----------|---------|
| 1  | C    | 5.58578  | 7.12139  | 3.02052 |
| 2  | C    | 5.98858  | 5.72800  | 3.00367 |
| 3  | C    | 7.40780  | 5.72683  | 3.01938 |
| 4  | C    | 7.81306  | 7.12027  | 3.04183 |
| 5  | C    | 9.44172  | 8.74845  | 3.06802 |
| 6  | C    | 10.84029 | 9.15079  | 3.08436 |
| 7  | C    | 10.84019 | 10.57711 | 3.07924 |
| 8  | C    | 9.44209  | 10.97935 | 3.06126 |
| 9  | C    | 7.81554  | 12.60930 | 3.03507 |
| 10 | C    | 7.41280  | 14.00308 | 3.01543 |
| 11 | C    | 5.99356  | 14.00470 | 3.01002 |
| 12 | C    | 5.58852  | 12.61151 | 3.02545 |
| 13 | C    | 3.95949  | 10.98429 | 3.02877 |
| 14 | C    | 2.55740  | 10.58479 | 3.01325 |
| 15 | C    | 2.55643  | 9.15147  | 3.01255 |
| 16 | C    | 3.95819  | 8.75025  | 3.02634 |
| 17 | C    | 5.25341  | 15.18071 | 2.99108 |
| 18 | C    | 5.96393  | 16.41252 | 2.97771 |
| 19 | C    | 7.45030  | 16.41046 | 2.98373 |
| 20 | C    | 8.15672  | 15.17649 | 3.00211 |

|    |    |          |          |         |
|----|----|----------|----------|---------|
| 21 | C  | 1.40158  | 8.40325  | 2.98718 |
| 22 | C  | 0.15565  | 9.11411  | 2.92166 |
| 23 | C  | 0.15670  | 10.62575 | 2.92170 |
| 24 | C  | 1.40369  | 11.33470 | 2.98742 |
| 25 | C  | 8.14867  | 4.55142  | 3.01103 |
| 26 | C  | 7.43911  | 3.31889  | 2.98668 |
| 27 | C  | 5.95285  | 3.32056  | 2.96683 |
| 28 | C  | 5.24558  | 4.55391  | 2.97592 |
| 29 | C  | 12.00397 | 11.32360 | 3.09477 |
| 30 | C  | 13.24362 | 10.61453 | 3.11508 |
| 31 | C  | 13.24418 | 9.11723  | 3.12059 |
| 32 | C  | 12.00527 | 8.40618  | 3.10551 |
| 33 | C  | 16.67747 | 9.87510  | 5.40700 |
| 34 | N  | 6.69895  | 7.95650  | 3.03954 |
| 35 | N  | 4.31306  | 7.48137  | 3.01802 |
| 36 | N  | 9.08484  | 7.47836  | 3.06033 |
| 37 | N  | 8.61400  | 9.86412  | 3.05781 |
| 38 | N  | 9.08675  | 12.24967 | 3.04882 |
| 39 | N  | 6.70037  | 11.77465 | 3.03830 |
| 40 | N  | 4.31546  | 12.25297 | 3.02448 |
| 41 | N  | 4.78272  | 9.86680  | 3.03555 |
| 42 | O  | 14.39215 | 8.53487  | 3.14905 |
| 43 | O  | 14.39104 | 11.19839 | 3.13933 |
| 44 | O  | 17.50685 | 11.20193 | 2.85539 |
| 45 | O  | 17.50504 | 8.53942  | 2.85453 |
| 46 | O  | 5.36088  | 2.16374  | 2.94314 |
| 47 | O  | 8.02873  | 2.16094  | 2.98083 |
| 48 | O  | 5.37489  | 17.57078 | 2.96027 |
| 49 | O  | 8.04316  | 17.56690 | 2.97221 |
| 50 | O  | 15.71133 | 9.89258  | 6.34622 |
| 51 | O  | 17.87379 | 9.86498  | 5.66781 |
| 52 | H  | 11.99942 | 12.41391 | 3.09287 |
| 53 | H  | 12.00310 | 7.31591  | 3.11177 |
| 54 | H  | 1.41086  | 12.42494 | 2.98618 |
| 55 | H  | 1.40698  | 7.31299  | 2.98644 |
| 56 | H  | 9.24720  | 15.17208 | 3.00522 |
| 57 | H  | 4.16295  | 15.18054 | 2.98617 |
| 58 | H  | 9.23912  | 4.55280  | 3.02298 |
| 59 | H  | 4.15525  | 4.55725  | 2.96129 |
| 60 | H  | 16.11216 | 9.89514  | 7.25033 |
| 61 | Ni | 6.69839  | 9.86540  | 3.04528 |
| 62 | Zn | 15.95889 | 9.86901  | 3.46209 |
| 63 | Zn | 6.69097  | 0.62228  | 2.95688 |
